# Supplementary material for: Problem and non-problem gamblers: a cross-sectional clustering study by gambling characteristics
Source: PubMed Central journal article supplement — BMJ Open. 2020 Feb 18;10(2):e030424. doi: 10.1136/bmjopen-2019-030424 (PMC7044887; doi:10.1136/bmjopen-2019-030424), 2020-02-18
Supplement: bmjopen-2019-030424.draft_revisions.pdf [file bmjopen-2019-030424.draft_revisions.pdf]

# BMJ Open

BMJ Open is committed to open peer review. As part of this commitment we make the peer review history of every article we publish publicly available.

When an article is published we post the peer reviewers' comments and the authors' responses online. We also post the versions of the paper that were used during peer review. These are the versions that the peer review comments apply to.

The versions of the paper that follow are the versions that were submitted during the peer review process. They are not the versions of record or the final published versions. They should not be cited or distributed as the published version of this manuscript.

BMJ Open is an open access journal and the full, final, typeset and author-corrected version of record of the manuscript is available on our site with no access controls, subscription charges or pay-per-view fees (<http://bmjopen.bmj.com>).

If you have any questions on BMJ Open's open peer review process please email [info.bmjopen@bmj.com](mailto:info.bmjopen@bmj.com)

# BMJ Open

## Problem and non problem gamblers : clustering according to gambling characteristics and course- a prospective study

|                               |                                                                                                                                                                                                                                                                                                                                                                                                                                                                                                                                                                                                                                                                                                                                                                                                                                                                                                                                                                                                                                                                                                                                                                                                                                                         |
|-------------------------------|---------------------------------------------------------------------------------------------------------------------------------------------------------------------------------------------------------------------------------------------------------------------------------------------------------------------------------------------------------------------------------------------------------------------------------------------------------------------------------------------------------------------------------------------------------------------------------------------------------------------------------------------------------------------------------------------------------------------------------------------------------------------------------------------------------------------------------------------------------------------------------------------------------------------------------------------------------------------------------------------------------------------------------------------------------------------------------------------------------------------------------------------------------------------------------------------------------------------------------------------------------|
| Journal:                      | <i>BMJ Open</i>                                                                                                                                                                                                                                                                                                                                                                                                                                                                                                                                                                                                                                                                                                                                                                                                                                                                                                                                                                                                                                                                                                                                                                                                                                         |
| Manuscript ID                 | bmjopen-2019-030424                                                                                                                                                                                                                                                                                                                                                                                                                                                                                                                                                                                                                                                                                                                                                                                                                                                                                                                                                                                                                                                                                                                                                                                                                                     |
| Article Type:                 | Research                                                                                                                                                                                                                                                                                                                                                                                                                                                                                                                                                                                                                                                                                                                                                                                                                                                                                                                                                                                                                                                                                                                                                                                                                                                |
| Date Submitted by the Author: | 22-Mar-2019                                                                                                                                                                                                                                                                                                                                                                                                                                                                                                                                                                                                                                                                                                                                                                                                                                                                                                                                                                                                                                                                                                                                                                                                                                             |
| Complete List of Authors:     | <p>guillou landreat, morgane; Universite de Bretagne Occidentale, ERCR SPURBO; CHRU de Brest, addictive disorders department<br/> chereau Boudet , isabelle; chu Clermont ferrand , addicctology and psychiatry department<br/> perrot, bastien; Université de Nantes, UMR 1246 SPHERE<br/> Romo, Lucia; Universite Paris-Nanterre, EA 4430 CLIPSYD "clinique psychiatrique developpement"; Hospital Louis-Mourier, addictive disorders<br/> codina , irene ; GPS Perray-Vaucluse<br/> magalon , david ; Hopital Sainte-Marguerite, department of adult psychiatry<br/> fatseas , melina ; University of Bordeaux, psychiatric laboratory SANPSY USR 3413; Hospital Centre Charles Perrens, addictive disorders<br/> Luquiens, Amandine; 1. Hôpital Paul Brousse, APHP Villejuif, France. Université Paris-Saclay, Univ. Paris-Sud, UVSQ, CESP, INSERM, Villejuif, France 2. CMAP, Ecole Polytechnique, 91128 Palaiseau Cedex, France , psychiatry and addictology department<br/> Brousse, Georges; CHU Clermont Ferrand, psychiatry and addictology group, jeu; chu nantes<br/> Challet-Bouju, Gaëlle; University Hospital of Nantes, addictology<br/> Grall-Bronnec, Marie; University Hospital of Nantes, addictology and psychiatry department</p> |
| Keywords:                     | gambling disorder, long term course, gamblers, addictive behaviors, addiction                                                                                                                                                                                                                                                                                                                                                                                                                                                                                                                                                                                                                                                                                                                                                                                                                                                                                                                                                                                                                                                                                                                                                                           |

SCHOLARONE™  
Manuscripts

1  
2  
3 **Title : Problem and non-problem gamblers: clustering according to gambling**  
4  
5  
6 **characteristics and course- a prospective study -**  
7  
8

9  
10 **Running head: Gambling course clustering in problem and non-problem gamblers**  
11

12  
13 **Authors list:**  
14

15 Morgane Guillou-Landreat<sup>a,b</sup>, Isabelle Chereau-Boudet<sup>c</sup>, Bastien Perrot<sup>d</sup>, Lucia Romo<sup>e,f</sup> #, Irène  
16 Codina<sup>g</sup>, David Magalon<sup>h</sup>, Mélina Fatseas<sup>i</sup>, Amandine Luquiens<sup>j</sup>, Georges Brousse<sup>c</sup>, JEU-Group, Gaëlle  
17  
18 Challet-Bouju<sup>d,k</sup>, Marie Grall-Bronnec<sup>d,k</sup> \*  
19  
20  
21  
22  
23  
24  
25

26 Members of the JEU Group:  
27

28  
29 *Marie Grall-Bronnec, Gaëlle Challet-Bouju, Jean-Luc Vénisse, Lucia Romo, Cindy*  
30 *Legauffre, Caroline Dubertret, Irène Codina, Marc Valleur, Marc Auriacombe, Mélina*  
31 *Fatséas, Jean-Marc Alexandre, Pierre-Michel Llorca, Isabelle Chéreau-Boudet, Christophe*  
32 *Lançon, David Magalon, Michel Reynaud et Amandine Luquiens.*  
33  
34  
35  
36  
37  
38  
39  
40  
41  
42  
43  
44

45 **Authors' Institutional Affiliations:**  
46

47  
48 **a.** CHU Brest, Department of addictive disorders, Brest, France  
49

50  
51 **b.** Université de Bretagne Occidentale, Addictive Disorders Department ERCR SPURBO, Brest, France  
52

53  
54 **c.** CHU Clermont-Ferrand, Addictology and Psychiatry Department, Clermont-Ferrand, France  
55

56  
57 **d.** Université Nantes, Université Tours, UMR 1246 SPHERE "MethodS for Patients-centered outcomes  
58 and HHealth REsearch", Nantes, France  
59  
60

1  
2  
3 e. EA 4430 CLIPSYD « CLInique PSYchanalyse Développement », University of Paris Ouest Nanterre La  
4  
5 Défense, France  
6  
7

8 f. Louis Mourier Hospital of Colombes, Assistance Publique – Hôpitaux de Paris (APHP), France  
9

10  
11 # Present address: Psychotherapies Unit, Sainte-Anne Hospital – Psychiatry and Neurosciences, Paris,  
12  
13 France  
14  
15

16 g. Marmottan Medical Center, GPS Perray-Vaucluse, Paris, France  
17  
18

19 h. Department of Adult Psychiatry, Sainte-Marguerite University Hospital of Marseille, France  
20  
21

22  
23 i. Psychiatry Laboratory, Sanpsy CNRS USR 3413, University of Bordeaux and Charles Perrens  
24  
25 Hospital, Bordeaux, France  
26  
27

28 j. Psychiatry and Addictology Department, Paul Brousse University Hospital of Villejuif, Assistance  
29  
30 Publique – Hôpitaux de Paris (APHP), France  
31  
32

33 k. CHU Nantes, Addictology and Psychiatry Department, Nantes, France  
34  
35

36  
37 **\* Corresponding author:**  
38

39 Marie Grall-Bronnec  
40  
41

42 Addictology and Psychiatry Department  
43  
44

45 Hôpital Saint Jacques - 85, rue Saint Jacques - 44093 Nantes cedex 1  
46  
47

48 Tel: 33 (0)2 40 84 61 16  
49  
50

51 Fax: 33 (0)2 40 84 61 18  
52  
53

54  
55 **CORRESPONDING AUTHOR'S EMAIL ADDRESS : [marie.bronnec@chu-nantes.fr](mailto:marie.bronnec@chu-nantes.fr)**  
56  
57

58 **Author's contributions :**  
59  
60

1  
2  
3 MGL , ICB, MGB, and GCB : redaction of the article  
4

5 GCB and BP : statistical analysis  
6

7 Jeu Group members : inclusion of participants, article reviewing .  
8  
9

10  
11  
12 **Word count (excluding abstract, references, tables and figure):**  
13

14  
15 **Declarations of competing interest, :**  
16

17  
18 MGB and GCB declare that the University Hospital of Nantes has received funding from the gambling  
19 industry (FDJ and PMU) in the form of a sponsorship that supports the gambling section of the  
20 BALANCED Unit (the Reference Centre for Excessive Gambling). Scientific independence towards  
21 gambling industry operators is warranted. There were no constraints on publishing.  
22

23 LR declares that the University of Paris Ouest Nanterre La Défense has received funding directly from  
24 gambling industry (FDJ and PMU) as part of other research contracts – this funding has never had any  
25 influence on the present work.  
26

27 All the other authors declare that they have no conflicts of interest.  
28  
29  
30  
31  
32  
33

34  
35  
36  
37  
38  
39 **Clinical Trial registration** : NCT01207674 (ClinicalTrials.gov)  
40

41  
42 **Statement 1: Role of funding sources**  
43

44  
45 The JEU cohort study was supported by joint support of the French Inter-departmental Mission for  
46 the fight against drugs and drug addiction (MILDT) and the French National Institute of Health and  
47 Medical Research (INSERM), as part of the call for research projects launched by these two  
48 organizations in 2007 [MIL08010], and a grant from the French Ministry of Health [PHRC 2009 – RCB  
49 2008-A01188-47]. They had no role in the study design, collection, analysis or interpretation of the  
50 data, writing the manuscript, or the decision to submit the paper for publication.  
51  
52  
53  
54  
55  
56

57  
58 The research presented here was conducted at the initiative of and coordinated by the Addictology  
59  
60

1  
2  
3 and Psychiatry Department of Nantes University Hospital. Nantes University Hospital is the sponsor  
4  
5 of this study. There were no constraints on publishing.  
6  
7  
8  
9

### 10 **Statement 2: Contributors**

11 MGB and GCB designed the JEU cohort study, conducted literature search and wrote the protocol.  
12  
13 MGB and GCB are responsible for the project management. BP provided methodological advice,  
14  
15 designed the statistical analysis plan and conducted the statistical analysis for this research. All  
16  
17 authors (including those mentioned in the JEU Group) contributed to include the participants in the  
18  
19 JEU cohort study and to the development of the protocol, especially to the selection of the  
20  
21 assessment content. MGL, MGB and GCB wrote the manuscript. All authors read and approved the  
22  
23 final manuscript.  
24  
25  
26  
27  
28  
29  
30  
31

### 32 **Statement 4: Acknowledgements**

33  
34 We wish to sincerely thank all the staff who contributed to this study (JEU group), for their valuable  
35  
36 assistance and significant investment. Special thanks go to those who collected the data. The  
37  
38 members of the JEU Group are: Marie Grall-Bronnec, Gaëlle Challet-Bouju, Jean-Luc Vénisse, Lucia  
39  
40 Romo, Cindy Legauffre, Caroline Dubertret, Irène Codina, Marc Valleur, Marc Auriacombe, Mélina  
41  
42 Fatséas, Jean-Marc Alexandre, Pierre-Michel Llorca, Isabelle Chéreau-Boudet, Christophe Lançon,  
43  
44 David Magalon, Michel Reynaud and Amandine Luquiens. This research was conducted at the  
45  
46 initiative of and coordinated by the Addictology and Psychiatry Department of the University Hospital  
47  
48 of Nantes, who is the sponsor of this study.  
49  
50  
51  
52  
53  
54  
55  
56  
57

### 58 **ABSTRACT**

59  
60

## Objectives

Gambling is a widespread activity worldwide that may induce gambling disorder (GD). Gambling characteristics are factors that could influence the course of the gamblers. The aim of this study was to identify a typology of gambler vulnerability based on gambling characteristics and to investigate factors associated with these different profiles in a large representative sample of gamblers.

## Design and setting

The JEU cohort study is a 5-year longitudinal national case-control cohort that sought to identify protective and risk factors in gambling practice [for more information, please refer to the study protocol of the JEU cohort: Challet-Bouju et al., 2014 [30]]. The present study was carried out using the baseline data of the JEU cohort. Recruitment occurred between April 2009 and September 2011 and involved a group of French clinicians and researchers from seven institutions that offer care for, or conduct research dedicated to, pathological gambling.

## Participants

The participants were gamblers who took part in the JEU cohort study : 628 non-problem gamblers (NPG), problem gamblers without treatment (PGWT) and problem gamblers seeking treatment (PGST).

## Results

We identified 3 clusters with significant differences in the course of their gambling: “early onset and short course” (EOSC), “early onset and long course” (EOLC) and “late onset and short course” (LOSC). The course of gambling characteristics, which differed among the three groups, were: age at onset, age when gambling became a problem, type of gambling and gambling medium.

## Conclusions

Gambling practice includes highly heterogeneous profiles. The course and characteristics of gambling may not individually explain problem gambling but may help define specific profiles with specific risks when combined. These results have implications regarding the need to develop policies and regulations to reduce exposure of vulnerable persons to gambling products.

1  
2  
3 **Key words**  
4  
5

6 **Gambling disorder, long term course, addictive behaviors , addiction**  
7

8  
9 **Clinical Trial registration** : NCT01207674 (ClinicalTrials.gov)  
10  
11

12 **Strenghts and limitations of this study**  
13

14 - The sample size of gamblers (N=628) has rarely been achieved for studies with semi-structured  
15 interviews.  
16

17  
18 -The mixing of NPG and PG who have, or have not, sought treatment is one of the main strengths of  
19 our study, with inclusion directly from gambling locations.  
20  
21

22  
23 - Recruitment of patients was done at the moment of the legalization of online gambling in France,  
24 which limits generalization , as online gambling has since become widely available.  
25  
26

27  
28 - Risk factors are self-reported at baseline evaluation. In future studies, these results should be  
29 compared to the longitudinal data.  
30  
31  
32  
33  
34  
35  
36  
37  
38  
39  
40  
41  
42  
43  
44  
45  
46  
47  
48  
49  
50  
51  
52  
53  
54  
55  
56  
57  
58  
59  
60



## 1. INTRODUCTION

Gambling is a widespread social activity worldwide. Almost all national surveys conclude that there are more gamblers than non-gamblers [1]; 75% of males and 71% of females had gambled in the past year in the UK [2], and 74% of the general population in France had gambled in their lifetime [3]. The gambling industry has developed many types of gambling games on different media, especially on the Internet. This expansion of legalized gambling has been identified as a public health concern [4-6].

Social gambling may become a gambling disorder (GD) in a minority of cases [7, 8]. GD is a persistent, maladaptive pattern of gambling resulting in clinically significant impairment or distress [9]. The lifetime prevalence of combined problem and pathological gambling across the world ranges from 0.7% to 6.5% [1]. In France, a national survey estimated that 2.7% of the population could be considered problem gamblers [3].

The status of the problem gambler is unstable over time [10], and gamblers can have very different courses of gambling development. Different factors—individual, environmental or those linked to gambling behavior characteristics—may influence gambling status and the course of their gambling course [1]. Many studies have focused on individual or environmental factors [1-3, 7, 10-14].

To facilitate prevention and to help an early identification of at-risk gamblers, different studies identified profiles for vulnerable gamblers through clustering. Blaszczynski and Nower defined a theoretical pathway model of problem gambling [15]. They identified 3 clusters of problem gamblers (conditioned gambler, emotionally vulnerable, and antisocial impulsivist) based mainly on clinical experience with pathological gamblers. They assumed that certain clinical variables, such as psychiatric comorbidities or impulsivity, could influence the course of their gambling. Several empirical studies on the Pathways Model and on other subtyping approaches to gambling confirmed clinical differences between PG profiles, even though no study has conclusively supported this classification and the underlying prognosis hypotheses [16-19].

To the very best of our knowledge, only a few studies have analyzed gambling characteristics and their influence on gambling status and the course of gambling. Gambling characteristics include many variables: age at initiation, gambling medium or type of gambling, gambling history, the amounts wagered, frequency of gambling, gambling status, etc. An early initiation age is a high-risk factor for the development of GD later in life and is associated with a higher level of GD severity [19-21]. Online gambling contributes to, and enhances, the risk of developing GD [2, 22], even though most online gamblers also gamble offline [2, 23]. When considering a favorite gambling activity, gamblers who preferentially play the same type of game share a common profile, independent of pathological characteristics [24]. Hing et al. identified profile differences between online EGM gamblers and those who bet online on sport or horses [8].

All these studies were, in a large majority of cases, undertaken within the PG population [17-19, 25-27], analyzed one specific gambling characteristic or defined clustering according to psychological variables and psychometric or cognitive assessment tests [17, 25, 27-29]. We did not find any studies in literature which involved a broad sample of gamblers, and included non-problem and problem gamblers and which were specifically concerned with gambling characteristics.

Our objective was to identify a typology of gamblers, based on gambling characteristics and the course of gambling and to investigate factors associated with these different profiles (such as gambling severity, personality traits or sociodemographic characteristics) in a large representative sample of gamblers.

## **2. MATERIAL AND METHODS**

### **2.1. Participants**

The participants were 628 non-problem gamblers (NPG), problem gamblers without treatment (PGWT) and problem gamblers seeking treatment (PGST) who took part in the JEU cohort study. The

JEU cohort study is a 5-year longitudinal national case-control cohort that sought to identify protective and risk factors in gambling practice [for more information, please refer to the study protocol of the JEU cohort: Challet-Bouju et al., 2014 [30]]. The present study was carried out using the baseline data of the JEU cohort.

Recruitment occurred between April 2009 and September 2011 and involved a group of French clinicians and researchers from seven institutions that offer care for, or conduct research dedicated to, pathological gambling.

Inclusion and exclusion criteria are presented in table 1.

| Inclusion criteria                                                               | Exclusion criteria                          |
|----------------------------------------------------------------------------------|---------------------------------------------|
| Participants who reported gambling on at least one occasion in the previous year | No gambling in the past year                |
| Between 18 and 65 years old                                                      | Under 18 or over 65 years old               |
| Understanding of French language                                                 | Cognitive impairment                        |
| Written consent                                                                  | Inability to understand the French language |
|                                                                                  | No consent                                  |

Table 1. Inclusion and exclusion criteria

NPGs and PGWTs were recruited in gambling locations (casinos, cafés, bars, etc.) and through the press to cover the broadest possible range of severity levels and gambling activities. In gambling locations, participation in the study was offered to each gambler at the in the gambling venue reception area (never during a gambling session). For those who were interested in participating, the study was presented in detail and eligibility was verified. The interview was conducted either in a room or a private location at the gambling venue or at the research team's offices (according to participants' preferences). PGSTs were recruited in the seven care centers where they had started their treatment less than 6 months previously. To be included, problem gamblers (both PGWT and

1  
2  
3 PGST) had to meet the diagnostic criteria for problem gambling, according to the DSM-IV (see the  
4  
5 Assessment section).  
6  
7

## 8 **2.2. Ethical approval**

9

10  
11 Participants were informed about the research and gave their written informed consent prior to their  
12  
13 inclusion in the study. This study was approved by the French Research Ethics Committee (CPP) on  
14  
15 January 8, 2009. The approval granted from the CPP applies to all sites at which the study occurred.  
16  
17

## 18 **Patient and public involvement**

19

20  
21 No patients nor the public were involved in the development of the research question. No patient  
22  
23 advisers was included in the research project.  
24  
25  
26  
27  
28  
29

## 30 **2.3. Assessment**

31

32  
33 The baseline assessment was performed at inclusion in the study. This was a clinical structured  
34  
35 interview carried out by a trained researcher or psychologist with experience in working with  
36  
37 pathological gamblers.  
38  
39  
40  
41

### 42 **2.3.1. Sociodemographic characteristics**

43  
44

45 We collected information about age, gender, marital status, income, and work status.  
46  
47

### 48 **2.3.2. Gambling characteristics**

49  
50

#### 51 **Pathological gambling section in the DSM-IV TR (APA 1994)**

52

53 We used a clinical interview based on the 10 diagnostic criteria for pathological gambling according  
54  
55 to the DSM-IV TR (APA, 2000). The gambling disorder section of the DSM-5 could not have been used  
56  
57 because the recruitment was conducted in 2009-2011. Gamblers who met at least three DSM-IV  
58  
59  
60

1  
2  
3 criteria were classified as problem gamblers, including both gamblers “at risk” of pathological  
4 gambling and gamblers with a diagnosis of pathological gambling. We used a non-standard threshold  
5 of three instead of five to include subclinical forms of pathological gambling. Previous literature has  
6 supported the relevance of this categorization [31-33]. The number of positive DSM-IV criteria for  
7 pathological gambling was also used as a dimensional score of PG severity.  
8  
9  
10  
11  
12  
13  
14  
15

### 16 **Gambling course and characteristics**

17  
18  
19 We constructed a questionnaire to collect information concerning the course of their gambling and  
20 characteristics. The course of the gambling was approached by investigating the history of their  
21 gambling practice: age at initiation and of first gambling-related problems, duration of gambling  
22 history (from age at initiation to current age) and age at the time of the diagnosis of comorbid  
23 psychiatric disorders (if relevant). We collected information about the familial and social support  
24 attitudes towards the problem gambler’s difficulties. The individual’s experimentation with a  
25 gambling-free period of at least one month’s duration since his/her initiation was also investigated.  
26  
27  
28  
29  
30  
31  
32  
33  
34  
35

36 We collected information on participation in, and frequency of, various gambling forms over the past  
37 year. This included the mean average amount of money wagered monthly in gambling and the  
38 maximum wager placed in a single day. With regard to gambling preferences, we investigated the  
39 preferred type of gambling and medium for gambling. Gamblers identified their preferred gambling  
40 activity among all those they had experienced and we classified the preferred type of gambling  
41 according to the three categories proposed by Boutin in 2010: pure chance games (lotteries, slot  
42 machines, scratch cards, video lottery terminals, etc.), bank games with an element of skill (sports  
43 betting, horserace betting, Blackjack) or social games with skill (mainly Texas Hold’em and Omaha  
44 variants of poker) [34]. We also asked them to specify if they preferred gambling on the Internet or in  
45 offline forms.  
46  
47  
48  
49  
50  
51  
52  
53  
54  
55  
56  
57  
58  
59  
60

### **2.3.3. Psychiatric comorbidities**

### ***Mini International Neuropsychiatric Interview (MINI) [35]***

The MINI is a structured diagnostic interview that is compatible with the International Statistical Classification of Diseases and Related Health Problems, Tenth Revision (ICD-10), and the Diagnostic and Statistical Manual of Mental Disorders, Fourth Edition (DSM-IV).

It explores the lifetime and actual main axis 1 disorders (mood and anxiety disorders, psychotic syndrome, alcohol and substance use disorders).

### ***Wender-Utah Rating Scale-Child (WURS-C) [36, 37]***

This self-report questionnaire has been validated for the retrospective evaluation of childhood ADHD in adults. Its specificity (89.1%) is good. It is designed to assess ADHD symptoms represented by 25 items on a 5-point Likert scale. A score greater than, or equal to, 46/100 would indicate that diagnosis [36, 37].

#### ***2.3.4. Personality***

### ***A 125-item version of the Temperament and Character Inventory (TCI-125) [38, 39]***

The TCI-125 is used to rapidly explore the four dimensions of temperament and the three dimensions of character in personality as defined by Cloninger's psychobiological model [40].

## **2.4. Statistical analysis**

A descriptive analysis of the sociodemographic, clinical and gambling characteristics was carried out in order to obtain means, medians and standard deviations for continuous variables, as well as the number of people and the percentage of categorical variables.

To identify a typology of gamblers based on the course of their gambling and their preferences, we performed a clustering of gamblers with eight variables: age at initiation, age at onset of gambling

1  
2  
3 problem, duration of gambling history, age at diagnosis of comorbid psychiatric disorder, history of a  
4 gambling-free period of at least one month's duration, familial and social support, and preferred type  
5 of gambling and medium for gambling. We used the Latent Gold software [41, 42] to perform a  
6 latent class clustering (LCC) of the gamblers. LCC is a person-centered approach that seeks to identify  
7 homogenous subgroups, each group being defined by a specific probability distribution. LCC has been  
8 found to be more likely to give superior classification results than the more traditional methods such  
9 as k-means or hierarchical clustering [43], particularly because it requires fewer assumptions.  
10 Moreover, LCC can handle mixed-mode data (i.e., both categorical and continuous variables) without  
11 transformation of variables. We ran models that comprised 1 to 6 clusters. Missing data were  
12 supposed missing at random because this missing data was considered independent of the values of  
13 the variable but dependent on another variable (e.g. missing values for age at onset of gambling  
14 problems were independent of the age at onset of gambling problems *variable*, and depended,  
15 instead, on whether or not the participant had ever had gambling problems at all). Missing data were  
16 handled with full information maximum likelihood (FIML) estimation. FIML consists of estimating a  
17 likelihood function for each individual based on the variables that are not missing so that all the  
18 available data are used. The Bayesian information criterion (BIC) (a lower BIC indicating a better  
19 model) and the classification errors rate (which represents the precision of individuals' classification)  
20 were used to select the best model. Statistical differences between clusters were assessed by Wald  
21 tests. Variables that do not influence the estimation of the model were included as covariates to  
22 describe and compare the clusters. For these inactive covariates, a 3-step approach (Vermunt, 2010)  
23 was used to test differences between clusters.

### 3. RESULTS

#### Descriptive analysis

24  
25  
26  
27  
28  
29  
30  
31  
32  
33  
34  
35  
36  
37  
38  
39  
40  
41  
42  
43  
44  
45  
46  
47  
48  
49  
50  
51  
52  
53  
54  
55  
56  
57 The sample was composed of 256 NPG, 169 PGWT and 203 PGST. The sociodemographics data of  
58 the whole sample (N = 628) are detailed in Table 2. Participants were mainly men (N = 418, 66.6%),  
59  
60

and the mean age was 43.4 years (SD = 12.9).

|                                                                                    | N        | %         |
|------------------------------------------------------------------------------------|----------|-----------|
| <b>Gender</b>                                                                      |          |           |
| Male                                                                               | 418      | 66.6      |
| Female                                                                             | 210      | 33.4      |
| <b>Marital status</b>                                                              |          |           |
| Single                                                                             | 313      | 49.9      |
| In a relationship                                                                  | 314      | 50.1      |
| <b>Educational level</b>                                                           |          |           |
| Below high school graduation                                                       | 306      | 48.9      |
| Higher than or equal to high school graduation                                     | 320      | 51.1      |
| <b>Professional activity</b>                                                       |          |           |
| Working                                                                            | 398      | 63.5      |
| Not working                                                                        | 229      | 36.5      |
| <b>Level of income</b>                                                             |          |           |
| Regular and higher than the French minimum wage<br>(approximately 1100€ or 1400\$) | 440      | 70.1      |
| Others                                                                             | 188      | 29.9      |
|                                                                                    | <b>M</b> | <b>SD</b> |
| <b>Age</b>                                                                         | 43.4     | 12.9      |

**TABLE 2. Descriptive analysis of sociodemographic variables for the whole sample**

Most participants were employed, with a regular income higher than 1,100€ (i.e., approximately 1,400 US\$). The mean age at gambling initiation was 20.7 years for NPG, 21 years for PGWT, and 19.5 years for PGST. Gambling characteristics are presented in Table 3.



| <b>Gambling status</b>                     | <b>NPG</b>            | <b>PGWT</b> | <b>PGST</b> |
|--------------------------------------------|-----------------------|-------------|-------------|
| Mean age at initiation (y.)                | 20.7                  | 21.0        | 19.5        |
| Mean age at onset of regular gambling (y.) | 27                    | 27.6        | 24.5        |
| Mean age at onset of problem gambling (y.) | <i>not applicable</i> | 34.9        | 34.1        |
| <b>Preferred gambling activity</b>         |                       |             |             |
| Pure chance games (%)                      | 67                    | 62          | 40          |
| Chance games with pseudo skills (%)        | 20                    | 27          | 40          |
| Chance games with elements of skills (%)   | 13                    | 11          | 14          |

**Table 3. Descriptive analysis of gambling characteristics among the three groups**

### **Clustering**

Among the 6 tested models, 2 were very similar in terms of the BIC indicator: a model with 3 clusters (BIC = 18253.8) and another with 4 clusters (BIC = 18252.6). Between the two models, the one with 3 clusters displayed a lower classification error rate (7.92% vs 13.80% for the 4-cluster solution) and was better suited to clinical interpretation. We thus chose the 3-cluster partition.

Clinical, socio-professional, psychological variables and gambling characteristics of the 3 clusters are presented in table 4.

1  
2  
3  
4  
5  
6  
7  
8  
9  
10  
11  
12  
13  
14  
15  
16  
17  
18  
19  
20  
21  
22  
23  
24  
25  
26  
27  
28  
29  
30  
31  
32  
33  
34  
35  
36  
37  
38  
39  
40  
41  
42  
43  
44  
45  
46  
47  
48  
49  
50  
51  
52  
53  
54  
55  
56  
57  
58  
59  
60

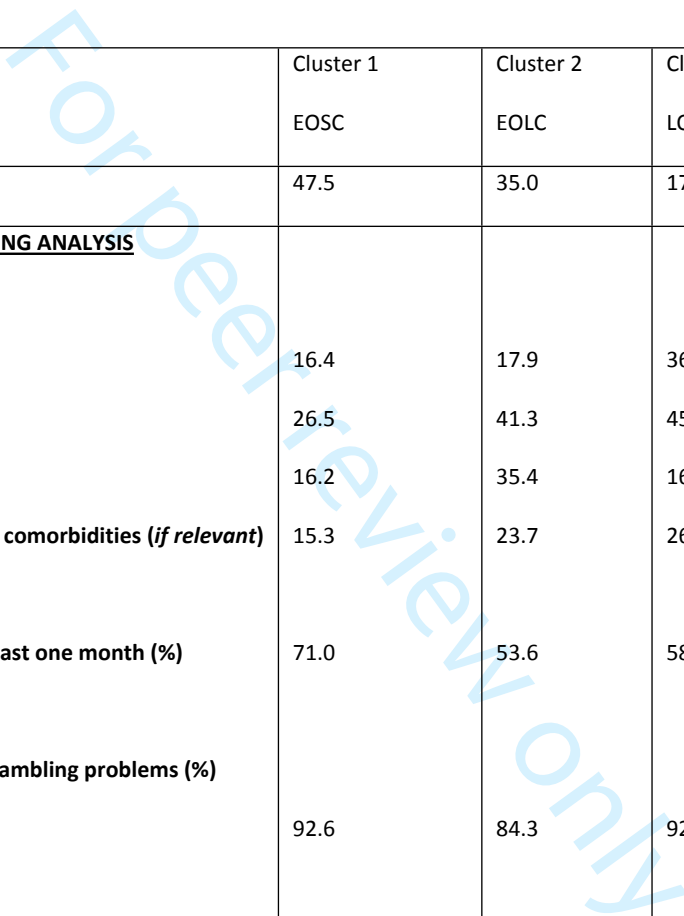

|                                                                                    | Cluster 1 | Cluster 2 | Cluster 3 | P value   |
|------------------------------------------------------------------------------------|-----------|-----------|-----------|-----------|
|                                                                                    | EOSC      | EOLC      | LOSC      | Wald test |
| <b>Cluster size (%)</b>                                                            | 47.5      | 35.0      | 17.5      |           |
| <b><u>VARIABLES INCLUDED IN THE CLUSTERING ANALYSIS</u></b>                        |           |           |           |           |
| <b>Age at gambling initiation (y.)</b>                                             | 16.4      | 17.9      | 36.1      | <0.001*** |
| <b>Age at onset of problem gambling (y.)</b>                                       | 26.5      | 41.3      | 45.1      | <0.001*** |
| <b>Duration of gambling history (y.)</b>                                           | 16.2      | 35.4      | 16.2      | <0.001*** |
| <b>Age at diagnosis of the first psychiatric comorbidities (if relevant) (y.)</b>  | 15.3      | 23.7      | 26.5      | <0.001*** |
| <b>History of gambling-free period of at least one month (%)</b>                   | 71.0      | 53.6      | 58.3      | 0.001**   |
| <b>Familial and social support related to gambling problems (%)</b>                | 92.6      | 84.3      | 92.5      | 0.018*    |
| <b>Preferred type of gambling</b>                                                  |           |           |           |           |
| Pure chance games (lotteries, slots, scratch cards, video lottery terminals, etc.) |           |           |           | <0.001*** |
| Bank games with an element of skill (sports betting, horserace betting, Blackjack) | 48.2      | 58.2      | 79.8      |           |
| Social games with skill (Texas Hold'em and Omaha variants of poker)                | 30.8      | 36.1      | 16.9      |           |
|                                                                                    | 21.0      | 5.7       | 3.4       |           |

1  
2  
3  
4  
5  
6  
7  
8  
9  
10  
11  
12  
13  
14  
15  
16  
17  
18  
19  
20  
21  
22  
23  
24  
25  
26  
27  
28  
29  
30  
31  
32  
33  
34  
35  
36  
37  
38  
39  
40  
41  
42  
43  
44  
45  
46  
47  
48  
49  
50  
51  
52  
53  
54  
55  
56  
57  
58  
59  
60

|                                                       |        |       |       |            |
|-------------------------------------------------------|--------|-------|-------|------------|
| <b>Preferred gambling medium (on the Internet)</b>    | 20.0   | 8.1   | 2.3   | <0.001***  |
| <b><u>CO-VARIABLES</u></b>                            |        |       |       |            |
| <b><u>Sociodemographic characteristics</u></b>        |        |       |       |            |
| <b>Gender (%)</b>                                     |        |       |       |            |
| Women                                                 | 23.5   | 32.4  | 62.5  | <0.001***  |
| Men                                                   | 76.5   | 67.6  | 37.5  |            |
| <b>Age (y.)</b>                                       | 32.7   | 53.4  | 52.3  | <0.001***  |
| <b>Level of income ≥1100 € (1400 \$ US) (%)</b>       | 67.2   | 72.8  | 72.4  | 0.250 (NS) |
| <b>Marital status (single) (%)</b>                    | 55.4   | 38.7  | 57.0  | <0.001***  |
| <b>Employment status (active) (%)</b>                 | 73.0   | 56.0  | 52.0  | <0.001***  |
| <b><u>Gambling severity</u></b>                       |        |       |       |            |
| <b>Gambling status (%)</b>                            |        |       |       |            |
| Non-problem gamblers (NPG)                            | 48.1   | 51.6  | 55.7  | 0.020*     |
| Problem gamblers without treatment (PGWT)             | 16.8   | 23.0  | 21.3  |            |
| Problem gamblers seeking treatment (PGST)             | 35.2   | 25.4  | 23.0  |            |
| <b>Number of DSM-5 criteria (mean)</b>                | 3.8    | 3.7   | 3.3   | 0.200(NS)  |
| <b><u>Gambling habits</u></b>                         |        |       |       |            |
| <b>Amount wagered monthly in gambling ( in euros)</b> | 592 .4 | 632.5 | 512.3 | 0.560(NS)  |
| <b>Gambling frequency over the past 12 months (%)</b> |        |       |       | 0.067(NS)  |

1  
2  
3  
4  
5  
6  
7  
8  
9  
10  
11  
12  
13  
14  
15  
16  
17  
18  
19  
20  
21  
22  
23  
24  
25  
26  
27  
28  
29  
30  
31  
32  
33  
34  
35  
36  
37  
38  
39  
40  
41  
42  
43  
44  
45  
46  
47  
48  
49  
50  
51  
52  
53  
54  
55  
56  
57  
58  
59  
60

|                                              |      |      |      |           |
|----------------------------------------------|------|------|------|-----------|
| Less than once a month                       | 8.2  | 6.9  | 8.6  |           |
| More than once a month                       | 17.6 | 12.9 | 19.2 |           |
| Once a week                                  | 13.2 | 14.6 | 20.6 |           |
| More than once a week                        | 61.0 | 65.7 | 51.6 |           |
| <b><u>Comorbid psychiatric disorders</u></b> |      |      |      |           |
| <b>Mood disorders (%)</b>                    | 46.1 | 45.5 | 56.0 | 0.110(NS) |
| Depressive episode (%)                       | 40.2 | 41.7 | 48.6 | 0.260(NS) |
| Hypomanic or manic episode (%)               | 13.6 | 9.2  | 12.9 | 0.240(NS) |
| <b>Anxiety disorders (%)</b>                 | 38.2 | 36.4 | 40.0 | 0.780(NS) |
| Panic disorder (with or without agoraphobia) | 18.4 | 21.4 | 25.4 | 0.220(NS) |
| Social phobia                                | 11.7 | 8.4  | 15.9 | 0.082(NS) |
| Obsessive Compulsive disorder                | 3.8  | 2.5  | 1.0  | 0.360(NS) |
| Generalized Anxiety Disorder                 | 17.4 | 12.0 | 11.7 | 0.087(NS) |
| Post-Traumatic Stress Disorder               | 7.2  | 6.3  | 9.7  | 0.490(NS) |
| <b>Addictive disorders (%)</b>               | 42.7 | 32.8 | 19.8 | <0.001*** |
| Alcohol Use Disorder                         | 28.7 | 27.0 | 13.7 | 0.007**   |
| Substance Use Disorder                       | 25.5 | 10.1 | 6.1  | <0.001*** |
| <b>Antisocial personality disorder (%)</b>   | 5.5  | 3.3  | 1.1  | 0.220(NS) |
| <b>Current suicide risk (%)</b>              | 19.4 | 26.7 | 29.5 | 0.027*    |
| <b>Lifetime suicide attempts (%)</b>         | 11.4 | 18.2 | 15.4 | 0.055(NS) |
| <b>ADHD</b>                                  |      |      |      |           |
| WURS score (M)                               | 31.7 | 28.7 | 28.3 | 0.096(NS) |

1  
2  
3  
4  
5  
6  
7  
8  
9  
10  
11  
12  
13  
14  
15  
16  
17  
18  
19  
20  
21  
22  
23  
24  
25  
26  
27  
28  
29  
30  
31  
32  
33  
34  
35  
36  
37  
38  
39  
40  
41  
42  
43  
44  
45  
46  
47  
48  
49  
50  
51  
52  
53  
54  
55  
56  
57  
58  
59  
60

| <b>Personality</b>     |      |      |      |           |
|------------------------|------|------|------|-----------|
| <b>TCI scores (M)</b>  |      |      |      |           |
| Novelty Seeking (NS)   | 54.9 | 51.5 | 48.6 | 0.001**   |
| Harm Avoidance (HA)    | 43.7 | 44.7 | 42.8 | 0.730(NS) |
| Determination (D)      | 67.8 | 67.0 | 68.7 | 0.720(NS) |
| Cooperation (C)        | 73.6 | 73.5 | 75.6 | 0.450(NS) |
| Reward Dependence (RD) | 60.8 | 59.1 | 60.7 | 0.460(NS) |
| Transcendence (T)      | 27.7 | 33.8 | 36.7 | <0.001*** |
| Persistence (P)        | 52.8 | 55.9 | 59.2 | 0.069(NS) |

**Table 4 . Profile of the three clusters identified**

NS: non-significant; \*: p<0.05; \*\*: p< 0.01; \*\*\*: p<0.001

We identified 3 clusters with significant differences among the courses of gambling. Figure 1 represents the **3 clusters**, and the **significant variables and co variables**.

**FIGURE 1.**

#### **4. DISCUSSION**

##### ***Main findings***

##### ***Three different profiles of gamblers***

1  
2  
3 Three distinct clinical profiles of gamblers were identified through the analysis of gambling  
4 characteristics. Differences in the course of gambling and in the characteristics corresponded to  
5 psychopathological profiles and they were significant in terms of socio-demographic variables  
6 (gender, age, work and marital status) and also in terms of gambling status and some comorbidities  
7 (addictive disorders, hypomanic episodes and personality traits). We propose a classification of our  
8 clusters, according to gambling characteristics: Early onset and Short course (EOSC) (Cluster 1) , Early  
9 onset and long Course (EOLC) (Cluster 2) and Late Onset and Short course (Cluster 3).

10  
11  
12 Our 3-clusters model, defined through the analysis of gambling characteristics, is partially  
13 comparable to the theoretical pathways model of Blaszczynski and Nower [15] which were, in turn,  
14 defined through psychopathological variables.

#### 15 16 17 *The Early Onset and Short Course cluster (Cluster 1-EOSC)*

18  
19  
20 The EOSC cluster shares similarities with the third pathway, “antisocial impulsivist problem  
21 gamblers” [15]. The mean age at gambling initiation is under 18 years, which is the legal age for  
22 gambling in France. Lynch *et al.* found that young adults who had started gambling prior to the age of  
23 18 were more likely to experience at least one symptom of GD than those who started gambling at  
24 the age of 18 or later [44]. Early initiation is described as a marker of risk of GD in later life: Kessler *et*  
25 *al.* (2008) found that the mean age at the onset of gambling was significantly lower among those  
26 who subsequently developed pathological gambling than among those who did not develop  
27 gambling problems [45, 46], and Jimenez *et al.* identified that a younger age at the onset of gambling  
28 was associated with greater severity of pathological gambling . Our results agreed with this  
29 hypothesis: the EOSC group had a higher frequency of problem gambling and higher gambling  
30 severity than the two other groups. Nevertheless, age at initiation did not explain the course of  
31 gambling in itself : the two clusters associated with the earlier age at onset presented two different  
32 courses of gambling, either a short development (approximately 10 years) for the EOSC cluster or a  
33 long development (approximately 23 years) for the EOLC cluster. One may suppose that

1  
2  
3 psychopathological variables combined with age at onset may influence the course of gambling, as  
4 defined in the pathways model. Impulsivity is a key point of the antisocial impulsivist pathway,  
5 associated with gambling-related criminal behaviors and addictive comorbidities [15]. In our study,  
6 the EOSC cluster presented the highest level of ADHD symptomatology. Novelty seeking was also  
7 high, as reported in the literature, especially in social games with skill [47, 48]. This was associated  
8 with a high prevalence of psychiatric and addictive comorbidities, as previously described for PG with  
9 impulsivity and ADHD [15, 49, 50]. This cluster in particular had a significantly higher preference for  
10 online gambling than the others. Gambling on the Internet is associated with a high availability of  
11 gambling opportunity, and online poker induces specific problems, leading problem gamblers to lose  
12 money but also to spend a large amount of time gambling [51]. Moreover, involvement in gambling  
13 and attraction to strategic games are risk factors for problem gambling [52]. Strategic games usually  
14 attract young males, with an earlier onset of the disorder [48]. They tend to engage in more than one  
15 specific type of problematic game and to take more risks, including betting high amounts of money  
16 [48]. This cluster included the highest frequency of PG and the highest frequency of PGST and they  
17 most frequently indicated the occurrence of gambling-free periods of one month, probably in an  
18 effort to regain control over gambling or in reaction to negative consequences.  
19  
20  
21  
22  
23  
24  
25  
26  
27  
28  
29  
30  
31  
32  
33  
34  
35  
36  
37  
38  
39  
40  
41  
42

#### 43 *EOLC cluster (Cluster 2)*

44  
45  
46 The EOLC cluster shares similarities with the first pathway defined by Blaszczynski and Nower as  
47 “conditioned problem gamblers” (CG). This CG group is defined by gamblers preoccupied with  
48 gambling, who engage in chasing and who fluctuate between excessive gambling and problem  
49 gambling. In our study, the EOLC cluster had a long course of gambling (35.4 years). They spent the  
50 highest amount of money on gambling, and only 53.6% had experienced a gambling cessation for at  
51 least one month. Moreover, an important characteristic is the absence of any lifetime premorbid  
52 feature of psychopathology before the onset of the gambling problem. Symptoms of anxiety or  
53  
54  
55  
56  
57  
58  
59  
60

1  
2  
3 depression were the consequences of problem gambling-related difficulties. However, at inclusion,  
4 they presented the highest prevalence of attempted suicide (and a current suicide risk in 26.7% of  
5 cases). One can assume that suicide risk and attempted suicides could be consequences of problem  
6 gambling-related difficulties [53].  
7  
8  
9  
10

11  
12 We showed important results concerning familial support : although EOLC gamblers lived  
13 predominantly with partners, they reported the lowest level of familial and social support related to  
14 gambling problems. We could hypothesize that gambling had severe consequences on the family, as  
15 shown in the literature [54, 55], thus reducing the familial support.  
16  
17  
18  
19  
20  
21

### 22 *The LOSC cluster (Cluster 3)*

23  
24  
25 The LOSC cluster shares similarities with the pathway “emotionally vulnerable problem  
26 gamblers”(EV) [15, 25, 26]. This cluster presented premorbid anxiety and/or depression: 56.0% had a  
27 lifetime history of mood disorder, with 29.5% experiencing a current suicide risk, which are the  
28 highest percentages of our sample. This cluster was also notable for the lowest frequency of seeking  
29 treatment. Suicide risk is one of the main dramatic consequences of gambling [53], and suicidal  
30 thoughts can lead to giving up gambling and accepting treatment. This course of gambling  
31 characteristic could support the hypothesis that participation in gambling is motivated by desire on  
32 the part of gamblers to modulate their emotional distress and their negative feelings [15]. The LOSC  
33 gamblers predominantly preferred pure chance games. Different studies have shown that gamblers  
34 who preferred slot machines had higher levels of depression [24, 56].  
35  
36  
37  
38  
39  
40  
41  
42  
43  
44  
45  
46  
47

48 We can underline two noticeable points in our LOSC cluster. First, in the LOSC cluster women were in  
49 the majority (62.5%), and in this cluster the course of gambling was the shortest observed in our  
50 study. These results support the concept of a “telescoping effect” in the course of problem gambling  
51 among women [57-59]. In the literature, this effect was indicated by female gamblers seeking  
52 treatment [60, 61], but it was not confirmed in the general population [62]. In our study, we included  
53 a mixed population of gamblers (NPG, PGWT and PGST), and our sample also consisted of gamblers  
54  
55  
56  
57  
58  
59  
60



1  
2  
3 who were somewhat older, (M=52 y. in LOSC cluster) in contrast to the Slustke sample [62].

4  
5 Second, the LOSC gamblers had the highest mean age at gambling initiation but also the shortest  
6  
7 gambling trajectory. As a consequence, we could conclude that the course of gambling and the risk of  
8  
9 problem gambling were not systematically linked to an early age of onset, but maybe to a  
10  
11 combination of psychopathological variables, age at initiation, gender vulnerabilities and type of  
12  
13 gambling , as hypothesized in some studies [18, 19].  
14  
15

### 16 17 ***Strengths and weaknesses of the study***

18  
19  
20 The study has several limitations, especially the relatively restricted amount of data collected.  
21  
22 Characteristics related to the course of gambling (age at initiation, age at onset of gambling  
23  
24 problems, etc.) and lifetime psychiatric disorders were assessed in a retrospective manner, they were  
25  
26 self-reported , which could induce a recall bias. Moreover, we did not use DSM 5 criteria, and we did  
27  
28 not analyze impulsivity and cognitive distortions in this population. Recruitment of patients was done  
29  
30 at the moment of the legalization of online gambling in France (2010) , which limits generalization ,  
31  
32 as online gambling has since become widely available. However, the mixing of NPG and PG who have,  
33  
34 or have not, sought treatment is one of the main strengths of our study. We also included gamblers  
35  
36 recruited directly from gambling locations. This method gave us access to a broad spectrum of  
37  
38 gambling activities. Finally, the sample size has rarely been achieved for studies with semi-structured  
39  
40 interviews (studies with such high numbers of participants are generally based on telephone-based  
41  
42 surveys).  
43  
44  
45  
46  
47  
48  
49  
50

### 51 ***Implications for clinicians and policymakers***

52  
53  
54 It is important to consider gambling characteristics because preventive interventions or policy  
55  
56 measures may reduce the risk of problem gambling or minimize harm from gambling [8]. We defined  
57  
58 a clustering of gamblers through the analysis of variables which were easy to identify, either by  
59  
60

1  
2  
3 psychiatrists or by physicians in primary care: gambling characteristics, age at gambling initiation,  
4 type of gambling and gambling medium, duration of gambling activities, age at onset of psychiatric  
5 comorbidities, history of gambling-free periods of at least one month's duration. We could  
6 hypothesize that simple pointers concerning these gambling characteristics could be constructed to  
7 prevent PG and to help PG identification.  
8  
9  
10  
11  
12  
13

14  
15 Prevention interventions should be tailored to these at-risk profiles. We demonstrated that a large  
16 majority of gamblers in this sample started to gamble before the legal age of 18 years. For the  
17 gambling prevention policy, it is worth noting that, despite the ban on gambling under 18 years of  
18 age, minors are able to gamble very early. We stress the need to develop early interventions to  
19 provide information and prevent gambling, especially among adolescents. Prevention programs  
20 could include targeted interventions for youth to explain gambling risks and how to avoid them. One  
21 explanation for the vulnerability of youth may be gambling advertising and availability. Gambling  
22 marketing is present in many media (advertising posters, the Internet, magazines, television, etc.)  
23 that are accessible to adolescents, and the content is very attractive. A recent study showed that  
24 marketing significantly influences attitudes towards gambling, behaviors and intention to participate  
25 [63].  
26  
27  
28  
29  
30  
31  
32  
33  
34  
35  
36  
37  
38  
39  
40

41 We also should pay attention to the type of gambling and the medium used for gambling. In our  
42 study, strategic games and Internet gambling seemed to be associated with more serious gambling  
43 profiles and short courses of gambling development in younger men. Targeted prevention on the  
44 Internet, especially regarding strategic games, could be developed to reduce harm from gambling.  
45 On the contrary, a large majority of the LOSC cluster preferred to gamble in pure chance games  
46 offline. Unlike casino or Internet games, pure chance offline games (especially scratch games) in  
47 France do not include any self-exclusion programs, and identity controls are not systematic when a  
48 ban is in place. As a consequence, French gamblers, with gambling problems, participating in pure  
49 chance games offline, are less able to put in place safeguards that may help them to quit or reduce  
50  
51  
52  
53  
54  
55  
56  
57  
58  
59  
60

gambling. This point is a public health concern, particularly when we consider, as in our study, that gambling problems occur in vulnerable persons. These results raise questions about the need for governments to develop policies and regulations to reduce young people's exposure to gambling products and marketing and to protect vulnerable persons from harm caused by gambling.

## REFERENCES

1. Calado, F. and M.D. Griffiths, *Problem gambling worldwide: An update and systematic review of empirical research (2000-2015)*. J Behav Addict, 2016. **5**(4): p. 592-613.
2. Wardle, H., et al., *The British Gambling prevalence survey 2010*. 2011: London : The Stationery Office
3. Costes, J.-M., et al., *Gambling Patterns and Problems of Gamblers on Licensed and Unlicensed Sites in France*. Journal of Gambling Studies / Co-Sponsored by the National Council on Problem Gambling and Institute for the Study of Gambling and Commercial Gaming, 2015.
4. Shaffer, H.J. and D.A. Korn, *Gambling and related mental disorders: a public health analysis*. Annu Rev Public Health, 2002. **23**: p. 171-212.
5. Williams, R.J., R.A. Volberg, and R.M.G. Stevens. *The population prevalence of problem gambling : methodological influences, standardized rates, jurisdictional differences, and worldwide trends*. Report prepared for the Ontario Problem Gambling Research Centre and the Ontario Ministry of Health and Long term Care 2012.
6. The, L., *Problem gambling is a public health concern*. Lancet, 2017. **390**(10098): p. 913.
7. De Luigi, N., et al., *Patterns of Gambling Activities and Gambling Problems Among Italian High School Students: Results from a Latent Class Analysis*. J Gambl Stud, 2017.
8. Hing, N., A.M. Russell, and M. Browne, *Risk Factors for Gambling Problems on Online Electronic Gaming Machines, Race Betting and Sports Betting*. Front Psychol, 2017. **8**: p. 779.
9. Association, A.P., *Association. Diagnostic and statistical manual of mental disorders (5th ed.)*. 2013, Washington, DC.
10. Bruneau, M., et al., *Gambling transitions among adult gamblers: A multi-state model using a Markovian approach applied to the JEU cohort*. Addict Behav, 2016. **57**: p. 13-20.
11. Costes, J.M., et al., *Levels and gambling practices in 2010* Lettre tendances 2011. **77**: p. 1-8.
12. Abbott, M.W., U. Romild, and R.A. Volberg, *Gambling and problem gambling in Sweden: changes between 1998 and 2009*. J Gambl Stud, 2014. **30**(4): p. 985-99.
13. Guillou Landreat, M., et al., *[Gambling in elderly patients]*. Soins Gerontol, 2017. **22**(123): p. 35-37.
14. Caillon, J., et al., *[Pathological gambling in adolescence]*. Arch Pediatr, 2012. **19**(2): p. 173-9.
15. Blaszczynski, A. and L. Nower, *A pathways model of problem and pathological gambling*. Addiction (Abingdon, England), 2002. **97**(5): p. 487-499.
16. Valleur, M., et al., *Towards a Validation of the Three Pathways Model of Pathological Gambling*. J Gambl Stud, 2016. **32**(2): p. 757-71.
17. Ledgerwood, D.M. and N.M. Petry, *Subtyping pathological gamblers based on impulsivity, depression, and anxiety*. Psychol Addict Behav, 2010. **24**(4): p. 680-8.
18. Jimenez-Murcia, S., et al., *Mediational Role of Age of Onset in Gambling Disorder, a Path Modeling Analysis*. J Gambl Stud, 2016. **32**(1): p. 327-40.
19. Jimenez-Murcia, S., et al., *Age of onset in pathological gambling : clinical, therapeutic and personality correlates* J Gambl Stud, 2010. **26**(2): p. 235-48.
20. Burge, A.N., et al., *Age of gambling initiation and severity of gambling and health problems among older adult problem gamblers*. Psychiatr Serv, 2004. **55**(12): p. 1437-9.

- 1
  - 2
  - 3
  - 4
  - 5
  - 6
  - 7
  - 8
  - 9
  - 10
  - 11
  - 12
  - 13
  - 14
  - 15
  - 16
  - 17
  - 18
  - 19
  - 20
  - 21
  - 22
  - 23
  - 24
  - 25
  - 26
  - 27
  - 28
  - 29
  - 30
  - 31
  - 32
  - 33
  - 34
  - 35
  - 36
  - 37
  - 38
  - 39
  - 40
  - 41
  - 42
  - 43
  - 44
  - 45
  - 46
  - 47
  - 48
  - 49
  - 50
  - 51
  - 52
  - 53
  - 54
  - 55
  - 56
  - 57
  - 58
  - 59
  - 60
21. Burge, A.N., R.H. Pietrzak, and N.M. Petry, *Pre/early adolescent onset of gambling and psychosocial problems in treatment-seeking pathological gamblers*. J Gambl Stud, 2006. **22**(3): p. 263-74.
22. Hlmg, N., et al., *Maintaining and losing control during internet gambling : a qualitative study of gamblers' experience* New media Soc. , 2014. **17**: p. 1075-1095.
23. Gainsbury, S.M., et al., *The interaction between gambling activities and modes of access: a comparison of Internet-only, land-based only, and mixed-mode gamblers*. Addict Behav, 2015. **41**: p. 34-40.
24. Challet-Bouju, G., et al., *A Gamblers Clustering Based on Their Favorite Gambling Activity*. J Gambl Stud, 2015. **31**(4): p. 1767-88.
25. Moon, M., et al., *Subtyping Non-treatment-seeking Problem Gamblers Using the Pathways Model*. J Gambl Stud, 2017. **33**(3): p. 841-853.
26. Nower, L. and A. Blaszczynski, *Development and validation of the Gambling Pathways Questionnaire (GPQ)*. Psychol Addict Behav, 2017. **31**(1): p. 95-109.
27. Suomi, A., N.A. Dowling, and A.C. Jackson, *Problem gambling subtypes based on psychological distress, alcohol abuse and impulsivity*. Addict Behav, 2014. **39**(12): p. 1741-5.
28. Nower, L., et al., *Subtypes of disordered gamblers: results from the National Epidemiologic Survey on Alcohol and Related Conditions*. Addiction, 2013. **108**(4): p. 789-98.
29. Mallorqui-bagué, N., et al., *Cognitive deficits in executive functions and decision-making impairments cluster gambling disorder sub-types* J Gambl Stud 2018. **34**(1): p. 209-223.
30. Challet-Bouju, G., et al., *Study protocol: the JEU cohort study--transversal multiaxial evaluation and 5-year follow-up of a cohort of French gamblers*. BMC Psychiatry, 2014. **14**: p. 226.
31. Toce-Gerstein, M., D.R. Gerstein, and R.A. Volberg, *A hierarchy of gambling disorders in the community*. Addiction, 2003. **98**(12): p. 1661-1672.
32. Potenza, M.N., *Should addictive disorders include non-substance-related conditions?* Addiction, 2006. **101** Suppl 1: p. 142-51.
33. Toneatto, T. and G. Millar, *Assessing and treating problem gambling: empirical status and promising trends*. Canadian Journal of Psychiatry. Revue Canadienne De Psychiatrie, 2004. **49**(8): p. 517-525.
34. Boutin, C., " *Le jeu: chance ou stratégie. Choisir librement la place du jeu dans votre vie*", ed. L'é.d. l'homme. 2010, Quebec
35. Lecrubier, Y., et al., *The Mini International Neuropsychiatric Interview (MINI). A short diagnostic structured interview: reliability and validity according to the CIDI*. European Psychiatry, 1997. **12**(5): p. 224-231.
36. Ward, M.F., P.H. Wender, and F.W. Reimherr, *The Wender Utah Rating Scale: an aid in the retrospective diagnosis of childhood attention deficit hyperactivity disorder*. The American Journal of Psychiatry, 1993. **150**(6): p. 885-890.
37. Caci, H.M., J. Bouchez, and F.J. Baylé, *An aid for diagnosing attention-deficit/hyperactivity disorder at adulthood: psychometric properties of the French versions of two Wender Utah Rating Scales (WURS-25 and WURS-K)*. Comprehensive Psychiatry, 2010. **51**(3): p. 325-331.
38. Cloninger, C., D.M. Svrakic, and T.R. Przybeck, *A psychobiological model of temperament and character*. Archives of General Psychiatry, 1993. **50**(12): p. 975-990.
39. N Chakroun-Vinciguerra, M.F., *French validation of a short version of the Temperament and Character Inventory (TCI-125)*. Journal de Thérapie Comportementale et Cognitive, 2005. **15**(1): p. 27-33.
40. De Fruyt, F., L. Van De Wiele, and C. Van Heeringen, *Cloninger's Psychobiological Model of Temperament and Character and the Five-Factor Model of Personality*. Personality and Individual Differences, 2000. **29**(3): p. 441-452.
41. Vermunt, J.K. and J. Magidson, *Latent class cluster analysis in Applied Latent Class Analysis* C.U. Press, Editor. 2002, Hagenaaers, J.A.

- 1  
2  
3 McCutcheon, A.L.: Cambridge p. 89-106.
- 4 42. Vermunt, J.K. and J. Magidson, *Upgrade Manual for Latent GOLD 5.1 Belmont*  
5 *Massachusetts: Statistical Innovations Inc.*, in *Statistical Innovations* 2016.
- 6 43. Magidson, J. and J.K. Vermunt, *Latent class models for clustering: a comparison with K-*  
7 *means*. *Canadian Journal of Marketing Research*, 2002. **20**: p. 36-43.
- 8 44. Lynch, W.J., P.K. Maciejewski, and M.N. Potenza, *Psychiatric correlates of gambling in*  
9 *adolescents and young adults grouped by age at gambling onset*. *Arch Gen Psychiatry*, 2004.  
10 **61**(11): p. 1116-22.
- 11 45. Kessler, R.C., et al., *DSM-IV pathological gambling in the National Comorbidity Survey*  
12 *Replication*. *Psychol Med*, 2008. **38**(9): p. 1351-60.
- 13 46. Slutske, W.S., et al., *Test of a potential causal influence of earlier age of gambling initiation*  
14 *on gambling involvement and disorder: a multilevel discordant twin design*. *Psychol Addict*  
15 *Behav*, 2014. **28**(4): p. 1177-89.
- 16 47. Bonnaire, C., M. Lejoyeux, and R. Dardennes, *Sensation seeking in a French population of*  
17 *pathological gamblers: comparison with regular and nongamblers*. *Psychol Rep*, 2004. **94**(3  
18 Pt 2): p. 1361-71.
- 19 48. Moragas, L., et al., *Comparative analysis of distinct phenotypes in gambling disorder based on*  
20 *gambling preferences*. *BMC Psychiatry*, 2015. **15**: p. 86.
- 21 49. Brandt, L. and G. Fischer, *Adult ADHD Is Associated With Gambling Severity and Psychiatric*  
22 *Comorbidity Among Treatment-Seeking Problem Gamblers*. *J Atten Disord*, 2017: p.  
23 1087054717690232.
- 24 50. Grall-Bronnec, M., et al., *Attention deficit hyperactivity disorder among pathological and at-*  
25 *risk gamblers seeking treatment: a hidden disorder*. *European Addiction Research*, 2011.  
26 **17**(5): p. 231-240.
- 27 51. Bonnaire, C., *[Internet gambling: what are the risks?]*. *Encephale*, 2012. **38**(1): p. 42-9.
- 28 52. Mouneyrac, A., et al., *Cognitive Characteristics of Strategic and Non-strategic Gamblers*. *J*  
29 *Gambl Stud*, 2017.
- 30 53. Guillou-Landreat, M., et al., *Factors associated with suicidal risk among a French cohort of*  
31 *problem gamblers seeking treatment*. *Psychiatry Res*, 2016. **240**: p. 11-18.
- 32 54. Dowling, N.A., et al., *The impacts of problem gambling on concerned significant others*  
33 *accessing web-based counselling*. *Addict Behav*, 2014. **39**(8): p. 1253-7.
- 34 55. Chan, E.M., et al., *Gambling related family coping and the impact of problem gambling on*  
35 *families in Hong Kong*. *Asian J Gambl Issues Public Health*, 2016. **6**(1): p. 1.
- 36 56. Bonnaire, C., C. Bungener, and I. Varescon, *Subtypes of French pathological gamblers:*  
37 *comparison of sensation seeking, alexithymia and depression scores*. *J Gambl Stud*, 2009.  
38 **25**(4): p. 455-71.
- 39 57. Bouju, G., et al., *Jeu pathologique : facteurs impliqués*. 2011.
- 40 58. Grall-Bronnec, M., et al., *Clinical profiles as a function of level and type of impulsivity in a*  
41 *sample group of at-risk and pathological gamblers seeking treatment*. *Journal of Gambling*  
42 *Studies / Co-Sponsored by the National Council on Problem Gambling and Institute for the*  
43 *Study of Gambling and Commercial Gaming*, 2012. **28**(2): p. 239-252.
- 44 59. Zakiniaez, Y., et al., *Does Telescoping Exist in Male and Female Gamblers? Does It Matter?*  
45 *Front Psychol*, 2017. **8**: p. 1510.
- 46 60. Grant, J.E., B.L. Odlaug, and M.E. Mooney, *Telescoping phenomenon in pathological*  
47 *gambling: association with gender and comorbidities*. *J Nerv Ment Dis*, 2012. **200**(11): p. 996-  
48 8.
- 49 61. Potenza, M.N., et al., *Gender-Related Differences in the Characteristics of Problem Gamblers*  
50 *Using a Gambling Helpline*. *American Journal of Psychiatry*, 2001. **158**(9): p. 1500-1505.
- 51 62. Slutske, W.S., et al., *Telescoping and gender differences in the time course of disordered*  
52 *gambling: evidence from a general population sample*. *Addiction*, 2015. **110**(1): p. 144-51.
- 53  
54  
55  
56  
57  
58  
59  
60

- 1  
2  
3 63. Pitt, H., et al., *Factors that influence children's gambling attitudes and consumption*  
4 *intentions: lessons for gambling harm prevention research, policies and advocacy strategies.*  
5 *Harm Reduct J*, 2017. **14**(1): p. 11.  
6  
7  
8  
9  
10  
11  
12  
13  
14  
15  
16  
17  
18  
19  
20  
21  
22  
23  
24  
25  
26  
27  
28  
29  
30  
31  
32  
33  
34  
35  
36  
37  
38  
39  
40  
41  
42  
43  
44  
45  
46  
47  
48  
49  
50  
51  
52  
53  
54  
55  
56  
57  
58  
59  
60

For peer review only

1  
2  
3  
4  
5  
6  
7  
8  
9  
10  
11  
12  
13  
14  
15  
16  
17  
18  
19  
20  
21  
22  
23  
24  
25  
26  
27  
28  
29  
30  
31  
32  
33  
34  
35  
36  
37  
38  
39  
40  
41  
42  
43  
44  
45  
46  
47  
48  
49  
50  
51  
52  
53  
54  
55  
56  
57  
58  
59  
60

For peer review only

1  
2  
3  
4  
5  
6  
7  
8  
9  
10  
11  
12  
13  
14  
15  
16  
17  
18  
19  
20  
21  
22  
23  
24  
25  
26  
27  
28  
29  
30  
31  
32  
33  
34  
35  
36  
37  
38  
39  
40  
41  
42  
43  
44  
45  
46  
47  
48  
49  
50  
51  
52  
53  
54  
55  
56  
57  
58  
59  
60

For peer review only



1  
2  
3  
4  
5  
6  
7  
8  
9  
10  
11  
12  
13  
14  
15  
16  
17  
18  
19  
20  
21  
22  
23  
24  
25  
26  
27  
28  
29  
30  
31  
32  
33  
34  
35  
36  
37  
38  
39  
40  
41  
42  
43  
44  
45  
46  
47  
48  
49  
50  
51  
52  
53  
54  
55  
56  
57  
58  
59  
60

For peer review only

Figure 1. Clustering : 3 clusters and significant variables and covariables

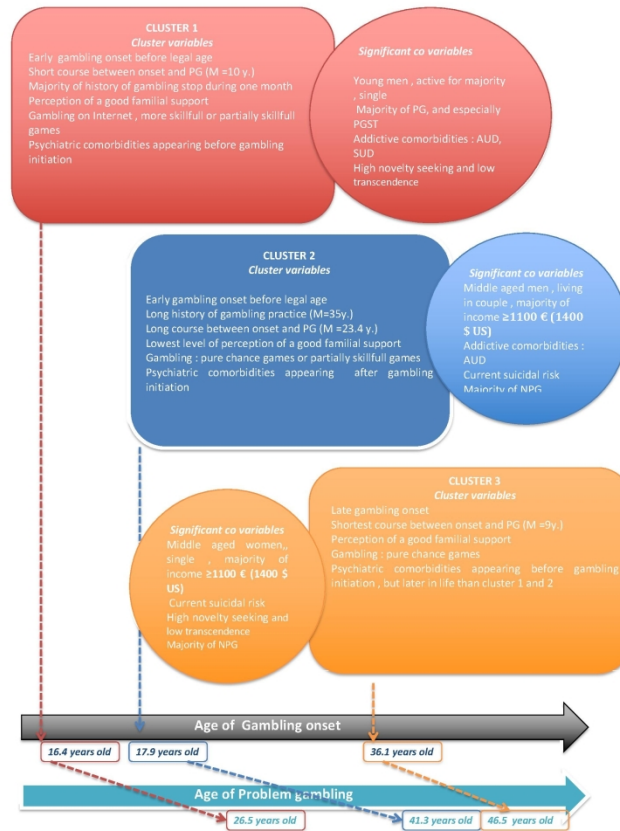

figure 1 . clustering : 3 clusters and significant variables and covariables

209x296mm (300 x 300 DPI)

# BMJ Open

## Problem and non-problem gamblers: A prospective cross-sectional clustering study by gambling characteristics

|                                 |                                                                                                                                                                                                                                                                                                                                                                                                                                                                                                                                                                                                                                                                                                                                                                                                                                                                                                                                                                                                                                                                                                                                                                                                                                                          |
|---------------------------------|----------------------------------------------------------------------------------------------------------------------------------------------------------------------------------------------------------------------------------------------------------------------------------------------------------------------------------------------------------------------------------------------------------------------------------------------------------------------------------------------------------------------------------------------------------------------------------------------------------------------------------------------------------------------------------------------------------------------------------------------------------------------------------------------------------------------------------------------------------------------------------------------------------------------------------------------------------------------------------------------------------------------------------------------------------------------------------------------------------------------------------------------------------------------------------------------------------------------------------------------------------|
| Journal:                        | <i>BMJ Open</i>                                                                                                                                                                                                                                                                                                                                                                                                                                                                                                                                                                                                                                                                                                                                                                                                                                                                                                                                                                                                                                                                                                                                                                                                                                          |
| Manuscript ID                   | bmjopen-2019-030424.R1                                                                                                                                                                                                                                                                                                                                                                                                                                                                                                                                                                                                                                                                                                                                                                                                                                                                                                                                                                                                                                                                                                                                                                                                                                   |
| Article Type:                   | Original research                                                                                                                                                                                                                                                                                                                                                                                                                                                                                                                                                                                                                                                                                                                                                                                                                                                                                                                                                                                                                                                                                                                                                                                                                                        |
| Date Submitted by the Author:   | 14-Oct-2019                                                                                                                                                                                                                                                                                                                                                                                                                                                                                                                                                                                                                                                                                                                                                                                                                                                                                                                                                                                                                                                                                                                                                                                                                                              |
| Complete List of Authors:       | <p>guillou landreat, morgane ; Universite de Bretagne Occidentale, ERCR SPURBO; CHRU de Brest, addictive disorders department<br/> chereau Boudet , isabelle; chu Clermont ferrand , addicctology and psychiatry department<br/> perrot, bastien; Université de Nantes, UMR 1246 SPHERE<br/> Romo, Lucia; Universite Paris-Nanterre, EA 4430 CLIPSYD "clinique psychiatrique developpement"; Hospital Louis-Mourier, addictive disorders<br/> codina , irene ; GPS Perray-Vaucluse<br/> magalon , david ; Hopital Sainte-Marguerite, department of adult psychiatry<br/> fatseas , melina ; University of Bordeaux, psychiatric laboratory SANPSY USR 3413; Hospital Centre Charles Perrens, addictive disorders<br/> Luquiens, Amandine; 1. Hôpital Paul Brousse, APHP Villejuif, France. Université Paris-Saclay, Univ. Paris-Sud, UVSQ, CESP, INSERM, Villejuif, France 2. CMAP, Ecole Polytechnique, 91128 Palaiseau Cedex, France , psychiatry and addictology department<br/> Brousse, Georges; CHU Clermont Ferrand, psychiatry and addictology group, jeu; chu nantes<br/> Challet-Bouju, Gaëlle; University Hospital of Nantes, addictology<br/> Grall-Bronnec, Marie; University Hospital of Nantes, addictology and psychiatry department</p> |
| <b>Primary Subject Heading</b>: | Mental health                                                                                                                                                                                                                                                                                                                                                                                                                                                                                                                                                                                                                                                                                                                                                                                                                                                                                                                                                                                                                                                                                                                                                                                                                                            |
| Secondary Subject Heading:      | Addiction                                                                                                                                                                                                                                                                                                                                                                                                                                                                                                                                                                                                                                                                                                                                                                                                                                                                                                                                                                                                                                                                                                                                                                                                                                                |
| Keywords:                       | gambling disorder, long term course, gamblers, addictive behaviors, addiction                                                                                                                                                                                                                                                                                                                                                                                                                                                                                                                                                                                                                                                                                                                                                                                                                                                                                                                                                                                                                                                                                                                                                                            |
|                                 |                                                                                                                                                                                                                                                                                                                                                                                                                                                                                                                                                                                                                                                                                                                                                                                                                                                                                                                                                                                                                                                                                                                                                                                                                                                          |

SCHOLARONE™  
Manuscripts

**Title: Problem and non-problem gamblers: A prospective cross-sectional clustering study by gambling characteristics**

**Running head: Gambling clustering in problem and non-problem gamblers**

**Authors list:**

Morgane Guillou-Landreat<sup>a,b</sup>, Isabelle Chereau-Boudet<sup>c</sup>, Bastien Perrot<sup>d</sup>, Lucia Romo<sup>e,f</sup> #, Irène Codina<sup>g</sup>, David Magalon<sup>h</sup>, Mélina Fatseas<sup>i</sup>, Amandine Luquiens<sup>j</sup>, Georges Brousse<sup>c</sup>, JEU-Group, Gaëlle Challet-Bouju<sup>d,k</sup>, Marie Grall-Bronnec<sup>d,k</sup> \*

Members of the JEU Group:

Marie Grall-Bronnec, Gaëlle Challet-Bouju, Jean-Luc Vénisse, Lucia Romo, Cindy Legauffre, Caroline Dubertret, Irène Codina, Marc Valleur, Marc Auriacombe, Mélina Fatséas, Jean-Marc Alexandre, Pierre-Michel Llorca, Isabelle Chéreau-Boudet, Christophe Lançon, David Magalon, Michel Reynaud, and Amandine Luquiens.

**Authors' Institutional Affiliations:**

**a.** CHU Brest, Department of Addictive Disorders, Brest, France

**b.** Université de Bretagne Occidentale, Addictive Disorders Department ERCR SPURBO, Brest, France

**c.** CHU Clermont-Ferrand, Addictology and Psychiatry Department, Clermont-Ferrand, France

**d.** Université Nantes, Université Tours, UMR 1246 SPHERE 'methodS for Patients-centered outcomes and HEalth Research', Nantes, France

**e.** EA 4430 CLIPSYD « CLInique PSYchanalyse Développement », University of Paris Ouest Nanterre La Défense, France

**f.** Louis Mourier Hospital of Colombes, Assistance Publique—Hôpitaux de Paris (APHP), France

# Present address: Psychotherapies Unit, Sainte-Anne Hospital—Psychiatry and Neurosciences, Paris, France

**g.** Marmottan Medical Centre, GPS Perray-Vaucluse, Paris, France

**h.** Department of Adult Psychiatry, Sainte-Marguerite University Hospital of Marseilles, France

**i.** Psychiatry Laboratory, Sanpsy CNRS USR 3413, University of Bordeaux and Charles Perrens Hospital, Bordeaux, France

**j.** Psychiatry and Addictology Department, Paul Brousse University Hospital of Villejuif, Assistance Publique—Hôpitaux de Paris (APHP), France

**k.** CHU Nantes, Addictology and Psychiatry Department, Nantes, France

\* **Corresponding author:**

1  
2  
3 Marie Grall-Bronnec

4 Addictology and Psychiatry Department

5 Hôpital Saint Jacques - 85, rue Saint Jacques - 44093 Nantes cedex 1

6  
7  
8 Tel: 33 (0)2 40 84 61 16

9 Fax: 33 (0)2 40 84 61 18

10  
11 **CORRESPONDING AUTHOR'S EMAIL ADDRESS: marie.bronnec@chu-nantes.fr**

12  
13  
14  
15 **Word count (excluding abstract, references, tables, and figure):**

16  
17 **Declarations of competing interest:**

18  
19  
20 MGB and GCB declare that the University Hospital of Nantes has received funding from the gambling  
21 industry (FDJ and PMU) in the form of a sponsorship that supports the gambling section of the  
22 BALANCED Unit (Reference Centre for Excessive Gambling). Scientific independence towards  
23 gambling industry operators is warranted. There were no constraints on publishing.

24 LR declares that the University of Paris Ouest Nanterre La Défense has received funding directly from  
25 gambling industry (FDJ and PMU) as part of other research contracts – this funding has never had any  
26 influence on the present work.

27 All the other authors declare that they have no conflicts of interest.  
28  
29  
30  
31

32  
33  
34  
35 **Clinical Trial Registration: NCT01207674 (ClinicalTrials.gov)**

36  
37 **Statement 1: Role of funding sources**

38  
39 The JEU cohort study was supported by joint support of the French Inter-Departmental Mission for  
40 the Fight against Drugs and Drug Addiction (MILDT) and the French National Institute of Health and  
41 Medical Research (INSERM), as part of the call for research projects launched by these two  
42 organisations in 2007 [MIL08010], and a grant from the French Ministry of Health [PHRC 2009 – RCB  
43 2008-A01188-47]. They had no role in the study design, collection, analysis, or interpretation of the  
44 data, writing of the manuscript, or decision to submit the paper for publication.

45  
46  
47  
48 The research presented here was conducted at the initiative of and coordinated by the Addictology  
49 and Psychiatry Department of Nantes University Hospital. Nantes University Hospital is the sponsor  
50 of this study. There were no constraints on publishing.  
51  
52  
53  
54

55  
56 **Statement 2: Authors' contributions:**

57  
58  
59 MGB and GCB designed the JEU cohort study, conducted the literature search, and wrote the  
60

1  
2  
3 protocol. MGB and GCB were responsible for project management. BP provided methodological  
4 advice, designed the statistical analysis plan, and conducted the statistical analysis for this research.  
5 All authors (including those mentioned in the JEU Group) contributed to the recruitment and  
6 inclusion of the participants in the JEU cohort study and to the development of the protocol,  
7 especially to the selection of the assessment content. MGL, MGB, and GCB wrote the manuscript. All  
8 authors read and approved the final manuscript.  
9  
10  
11  
12  
13  
14  
15  
16

#### **Statement 4: Acknowledgements**

17 We wish to sincerely thank all the staff who contributed to this study (the JEU Group), for their  
18 valuable assistance and significant investment. Special thanks go to those who collected the data.  
19 The members of the JEU Group are: Marie Grall-Bronnec, Gaëlle Challet-Bouju, Jean-Luc Vénisse,  
20 Lucia Romo, Cindy Legauffre, Caroline Dubertret, Irène Codina, Marc Valleur, Marc Auriacombe,  
21 Méлина Fatséas, Jean-Marc Alexandre, Pierre-Michel Llorca, Isabelle Chéreau-Boudet, Christophe  
22 Lançon, David Magalon, Michel Reynaud, and Amandine Luquiens. This research was conducted at  
23 the initiative of and coordinated by the Addictology and Psychiatry Department of the University  
24 Hospital of Nantes, who sponsored this study.  
25  
26  
27  
28  
29  
30  
31  
32

#### **Statement 5 : Data availability**

33 **No additional data available**  
34  
35  
36  
37

## **ABSTRACT**

### **Objectives**

38 Gambling characteristics are factors that could influence problem gambling development. The aim of  
39 this study was to identify a typology of gamblers to frame risky behaviour based on gambling  
40 characteristics (age of initiation, age of problem gambling, type of gambling: pure chance/chance  
41 with pseudoskills/chance with elements of skill, media of gambling: online/offline, amount wagered  
42 monthly) and to investigate clinical factors associated with these different profiles in a large  
43 representative sample of gamblers.  
44  
45  
46  
47  
48  
49  
50

### **Design and setting**

51 The study is a cross-sectional analysis to the baseline data of the french JEU cohort study (study  
52 protocol of the JEU cohort: Challet-Bouju et al., 2014). Recruitment between April 2009 and  
53 September 2011 involved clinicians and researchers from seven institutions that offer care for or  
54 conduct research on PG. Participants were recruited in gambling places, and in care centres. Only  
55 participants who reported gambling in the previous year between 18 and 65 years old were included.  
56  
57  
58  
59  
60

1  
2  
3 Participants gave their written informed consent, it was approved by the French Research Ethics  
4 Committee.  
5

### 6 **Participants**

7  
8 The participants were 628 gamblers : 256 non-problem gamblers (NPG), 169 problem gamblers  
9 without treatment (PGWT), and 203 problem gamblers seeking treatment (PGST).  
10

### 11 **Results**

12  
13 We identified three clusters with significant differences in the development of their gambling: 'Early  
14 Onset and Short Course' (47.5%), 'Early Onset and Long Course' (35%), and 'Late Onset and Short  
15 Course' (17.5%). Gambling characteristics differed significantly between the three clusters.  
16  
17

### 18 **Conclusions**

19  
20 We defined clusters through the analysis of gambling variables , easy to identify, either by  
21 psychiatrists or by physicians in primary care. Simple pointers concerning these gambling  
22 characteristics could be constructed to prevent PG and to help PG identification. It is also important  
23 to consider gambling characteristics because policy measures targeting gambling characteristics may  
24 reduce the risk of problem gambling or minimise harm from gambling.  
25  
26  
27  
28  
29  
30

### 31 **Key words**

32 **Gambling disorder, long term course, addictive behaviours, addiction**

33 **Clinical Trial Registration:** NCT01207674 (ClinicalTrials.gov)

### 34 **Strengths and limitations of this study**

- 35  
36  
37 - The sample size of gamblers ( $N = 628$ ) has rarely been achieved for studies with semi-structured  
38 interviews.  
39  
40 -The mixed sample of NPGs and PGs who have or have not sought treatment is one of the main  
41 strengths of our study, with inclusion directly from gambling locations.  
42  
43 - Recruitment of patients was performed at the moment of the legalisation of online gambling in  
44 France, which limits generalisation, as online gambling has since become widely available.  
45  
46 - Risk factors are self-reported at baseline evaluation. In future studies, these results should be  
47 compared to longitudinal data.  
48  
49  
50  
51  
52  
53  
54  
55  
56  
57  
58  
59  
60

## 1. INTRODUCTION

Gambling is a widespread social activity worldwide. Almost all national surveys conclude that there are more gamblers than non-gamblers [1]. For example, 74% of the general population in France had gambled in their lifetime [2]. The gambling industry has developed many types of gambling on different media, especially on the Internet. This expansion of legalised gambling has been identified as a public health concern [3-5]. Participation in gambling increases with gambling deregulation, prolific advertising, and the growing availability of gambling [6, 7].

Social gambling may become a gambling disorder (GD) in a minority of cases [7, 8]. GD is defined as a persistent, maladaptive pattern of gambling resulting in clinically significant impairment or distress, according to the Fifth Edition of the *Diagnostic and Statistical Manual of Mental Disorders* [9]. Around the world, between 0.2% and 2.1% of the population develops a GD [10], but a larger proportion experiences 'problem gambling', meaning having difficulties with gambling, but not as severe as those classified as GD [10]. Throughout this paper, 'problem gamblers' or 'problem gambling' will refer to a heterogeneous group of persons or conditions encompassing GD and its subthreshold symptoms. The lifetime prevalence of problem gambling across the world ranges from 0.7% to 6.5% [1]. In France, the last national survey estimated that 2.7% of the population could be considered problem gamblers [2].

The status of the problem gambler is unstable over time [11], and gamblers can have very different types of problem gambling development. Different factors—individual, environmental, or those linked to gambling behaviour characteristics—may influence gambling status and the development of problem gambling [1].

Most of the studies of problem gambling risk factors have focused on individual or environmental factors. Problem gambling is more likely to occur among men [1, 2, 11, 12], individuals with psychiatric disorders (anxiety, depression, and Attention Deficit/Hyperactivity Disorder [ADHD]) [11], or individuals of extreme old or young age [13-16]. Environmental factors such as level of income, socio-economic integration, or social support have an influence both on problem gambling prevalence worldwide and on individual gambling development and transitions between social gambling and problem gambling [1, 8, 11]. Different clusters of problem gamblers emerged through the analysis of these clinical variables [17-21]. Blaszczynski and Nower defined a theoretical pathway model of problem gambling [17]. They identified three clusters of problem gamblers (conditioned gamblers, emotionally vulnerable gamblers, and antisocial impulsivist gamblers) based mainly on clinical experience with problem gamblers and through analysis of psychopathological variables. They assumed that certain clinical variables, such as psychiatric comorbidities or impulsivity, could influence the development of problem gambling. Several empirical studies of this pathways model



1  
2  
3 and other subtyping approaches confirmed clinical differences between problem gamblers' profiles,  
4 even though no study has conclusively supported this clinical classification and the underlying  
5 prognosis hypotheses [18-21]. In all these studies, clustering was made through analysis of  
6 psychopathological variables measured with psychometrics tools and did not include gambling  
7 characteristics.  
8  
9

10  
11 Only a few studies have analysed gambling characteristics and their influence on gambling status  
12 (social gambling or problem gambling) and problem gambling development [7, 12, 21-26]. Gambling  
13 characteristics include many variables: age of initiation, medium or type of gambling, gambling  
14 history, wagering amounts, frequency of gambling, gambling status (problem or non-problem  
15 gamblers), etc. An early age of initiation is a high risk factor for the development of problem  
16 gambling later in life and is associated with a higher level of problem gambling severity [21-23].  
17 Online gambling contributes to and enhances the risk of problem gambling development [6, 12],  
18 even if most online gamblers also gamble in offline forms [12, 24]. When considering preferred  
19 gambling activity, gamblers who preferentially play the same type of games share a common profile  
20 independent of the pathological characteristics [25]. Hing *et al.* compared the profiles of online  
21 gamblers according to their preferred type of gambling (electronic gaming machine (EGM), horse  
22 racing, or sport betting); they showed that online bettors were younger men, with more frequent  
23 substance use [7].  
24  
25

26 All these previous studies were, in a large majority of cases, undertaken within the problem gambling  
27 population [19-21, 27-29]. They analysed one specific gambling characteristic or defined clustering  
28 according to psychological variables and psychometric or cognitive assessment tests [19, 27, 29-31].  
29 Combined with individual at-risk factors as psychopathological variables, clinicians should be aware  
30 of gambling characteristics.  
31  
32

33 We hypothesised that gambling structural characteristics influenced gamblers' profiles and problem  
34 gambling development, that clustering through gambling characteristics would help to identify  
35 different types of problem gamblers, and that this classification would be clinically pertinent.  
36  
37

38 We did not find any studies in the literature which involved a broad sample of gamblers, included  
39 non-problem and problem gamblers, and specifically concerned gambling characteristics.  
40  
41

42 Our objective was to identify a typology of gamblers based on clinical and gambling characteristics,  
43 and to investigate factors associated with these different profiles in a large representative sample of  
44 gamblers.  
45  
46

47 The findings can help all clinicians, even non-specialists, to be aware of and identify at-risk problem  
48 gamblers through the evaluation of gambling characteristics. It may also improve at-risk gambler  
49 interventions tailored to the specific gambling characteristics.  
50  
51  
52  
53  
54  
55  
56  
57  
58  
59  
60

## 2. MATERIAL AND METHODS

### 2.1. Participants

The participants were 628 gamblers who took part in the JEU cohort study. The sample included 256 non-problem gamblers (NPG), 169 problem gamblers without treatment (PGWT), and 203 problem gamblers seeking treatment (PGST). The JEU cohort study is a 5-year longitudinal national case-control cohort in France that seeks to identify protective and risk factors in gambling practice (for more information, please refer to the study protocol of the JEU cohort: Challet-Bouju et al., 2014 [32]). The present study applied a cross sectional analysis to the baseline data of the JEU cohort.

Recruitment occurred between April 2009 and September 2011 and involved a group of French clinicians and researchers from seven institutions that offer care for or conduct research on pathological gambling.

The sample was constituted based on an approximate equality of size between problem and non-problem gamblers because of the low prevalence of gambling problems in the general population. Participants were recruited in different gambling places (casinos, cafés, smoke shops, etc.) and via the press in order to cover the broadest possible range of gambling activities. In gambling places, all the gamblers were solicited outside of gambling time, because gamblers are particularly irritable when gambling and in order to avoid disturbing the gambling venue activity. We have no information about non-responders as a consequence of the arrangements with the gambling places which agreed to help us, whereby we sought no information from gamblers who refused to participate in the first instance. Problem gamblers were also recruited in seven care centres, where they had started treatment less than 6 months before. Only participants who reported gambling on at least one occasion in the previous year and who were between 18 and 65 years old were included in the study. Participants were given a compensation of €15, except for problem gamblers from care centres with whom the interview would have been held for care purposes anyway.

Inclusion and exclusion criteria are presented in Table 1.

| Inclusion criteria                                                               | Exclusion criteria                          |
|----------------------------------------------------------------------------------|---------------------------------------------|
| Participants who reported gambling on at least one occasion in the previous year | No gambling in the past year                |
| Between 18 and 65 years old                                                      | Under 18 or over 65 years old               |
| Understanding of French language                                                 | Cognitive impairment                        |
| Written consent                                                                  | Inability to understand the French language |
|                                                                                  | No consent                                  |

Table 1. Inclusion and exclusion criteria

### 2.2. Ethical approval

1  
2  
3 Participants were informed about the research and gave their written informed consent prior to their  
4 inclusion in the study. This study was approved by the French Research Ethics Committee (CPP) on  
5 January 8, 2009. The approval granted from the CPP applies to all sites at which the study occurred.  
6  
7

8  
9 Participants gave their written informed consent prior to their inclusion in the study. This study was  
10 approved by the French Research Ethics Committee.  
11  
12

### 13 **Patient and public involvement**

14  
15  
16 No patients nor the public were involved in the development of the research question. No patient  
17 advisers were included in the research project.  
18  
19

### 20 **2.3. Assessment**

21  
22  
23 The baseline assessment was performed just after inclusion in the study. The assessment combines a  
24 clinical structured interview carried out with a trained researcher or psychologist with a set of  
25 standardised self-report questionnaires. Participants completed the baseline interview in the  
26 research centre or the gambling place in which they were recruited.  
27  
28  
29

#### 30 **2.3.1. Sociodemographic characteristics**

31  
32 We collected information about age, gender, marital status, income, and work status.  
33  
34

#### 35 **2.3.2. Gambling characteristics**

##### 36 **Pathological gambling section in the DSM-IV TR (APA 1994)**

37  
38 We used a clinical interview based on the 10 diagnostic criteria for pathological gambling according  
39 to the DSM-IV TR (APA, 2000). The gambling disorder section of the DSM-5 could not have been used  
40 because the recruitment was conducted in 2009–2011. Gamblers who met at least three DSM-IV  
41 criteria were classified as problem gamblers, including both gamblers “at risk” of pathological  
42 gambling and gamblers with a diagnosis of pathological gambling. We used a non-standard threshold  
43 of three instead of five so as to include subclinical forms of pathological gambling. Previous literature  
44 has supported the relevance of this categorisation [33-35]. The number of positive DSM-IV criteria  
45 for pathological gambling was also used as a dimensional score of PG severity.  
46  
47  
48  
49  
50  
51

##### 52 **Problem gambling development and characteristics**

53  
54 We constructed a questionnaire to collect information concerning the course and characteristics of  
55 their gambling. The development of the gambling was approached by investigating the history of  
56 their gambling practice: age at initiation and of first gambling-related problems, duration of gambling  
57 history (from age at initiation to current age), and age at the time of the diagnosis of comorbid  
58  
59  
60

1  
2  
3 psychiatric disorders (if relevant). We collected information about the familial and social support  
4 attitudes towards the problem gambler's difficulties. The individual's experimentation with a  
5 gambling-free period of at least one month's duration since his/her initiation was also investigated.  
6  
7

8  
9 We collected information on participation in and frequency of various forms of gambling over the  
10 past year. This included the mean average amount of money wagered monthly in gambling and the  
11 maximum wager placed in a single day. With regard to gambling preferences, we investigated the  
12 preferred type of gambling and medium for gambling, presented in Table 2. Gamblers identified  
13 their preferred gambling activity among all those they had experienced and we classified the  
14 preferred type of gambling according to the three categories proposed by Boutin in 2010: pure  
15 chance games (lotteries, slot machines, scratch cards, video lottery terminals, etc.), bank games with  
16 an element of skill (sports betting, horserace betting, blackjack), or social games with skill (mainly  
17 Texas Hold'em and Omaha variants of poker) [36]. We also asked them to specify if they preferred  
18 gambling on the Internet or offline.  
19  
20  
21  
22  
23  
24  
25  
26  
27  
28  
29

|                    |                                                                                                                                                                                                      |
|--------------------|------------------------------------------------------------------------------------------------------------------------------------------------------------------------------------------------------|
| Type of gambling   | Pure chance games (video lottery terminals, scratch games, lotteries)<br><br>Chance games with pseudoskills (sport and horse betting, blackjack)<br><br>Chances games with element of skills (poker) |
| Medium of gambling | Online: gambling on the Internet<br><br>Offline: smoke shop, café, casino, etc.                                                                                                                      |
| Gambling status    | Non-problem gambler (NPG)<br><br>Problem gambler seeking treatment (PGST)<br><br>Problem gambler without treatment (PGWT)                                                                            |

30  
31  
32  
33  
34  
35  
36  
37  
38  
39  
40  
41  
42  
43  
44  
45  
46  
47  
48  
49  
50  
51  
52  
53  
54  
55 **Table 2. Types and media of gambling and gambling status**

56  
57 **2.3.3. Psychiatric comorbidities**

58  
59 **Mini International Neuropsychiatric Interview (MINI)**  
60

1  
2  
3 The MINI is a structured diagnostic interview that is compatible with the International Statistical  
4 Classification of Diseases and Related Health Problems, Tenth Revision (ICD-10), and the Diagnostic  
5 and *Statistical Manual of Mental Disorders*, Fourth Edition (DSM-IV) [37].

6  
7  
8 It explores the lifetime and current main Axis I disorders (mood and anxiety disorders, psychotic  
9 syndrome, alcohol and substance use disorders).

### 11 12 13 ***Wender-Utah Rating Scale-Child (WURS-C)***

14  
15 This self-report questionnaire has been validated for the retrospective evaluation of childhood ADHD  
16 in adults. Its specificity (89.1%) is good. It is designed to assess ADHD symptoms represented by 25  
17 items on a 5-point Likert scale. A score greater than or equal to 46/100 would indicate that diagnosis  
18 [38, 39].

### 19 20 21 22 23 **2.3.4. Personality**

#### 24 25 ***A 125-item version of the Temperament and Character Inventory (TCI-125)***

26  
27 The TCI-125 is used to rapidly explore the four dimensions of temperament and the three dimensions  
28 of character in personality as defined by Cloninger's psychobiological model [40]. It measures seven  
29 dimensions through four temperaments and three characters [41, 42]. The dimensions related to  
30 temperament (genetic and stable tendencies of personality) and the dimensions related to character  
31 (acquired under the influence of apprenticeship, experience, and environment) were assessed.

### 32 33 34 35 36 37 **2.4. Statistical analysis**

38  
39 A descriptive analysis of the sociodemographic, clinical, and gambling characteristics was carried out  
40 in order to obtain means, medians, and standard deviations of continuous variables, as well as the  
41 number of people and the percentages of categorical variables.

42  
43  
44  
45 To identify a typology of gamblers based on the course of their gambling and their preferences, we  
46 led an exploratory analysis. We performed a clustering of gamblers with eight variables: age at  
47 initiation, age at onset of gambling problem, duration of gambling history, age at diagnosis of  
48 comorbid psychiatric disorder, history of a gambling-free period of at least one month's duration,  
49 familial and social support, and preferred type of gambling and medium for gambling. We used the  
50 Latent Gold software [43, 44] to perform a latent class clustering (LCC) of the gamblers. LCC is a  
51 person-centred approach that seeks to identify homogenous subgroups, each group being defined by  
52 a specific probability distribution. LCC has been found to be more likely to give superior classification  
53 results than more traditional methods such as *k*-means or hierarchical clustering [45], particularly  
54  
55  
56  
57  
58  
59  
60

because it requires fewer assumptions. Moreover, LCC can handle mixed-mode data (i.e., both categorical and continuous variables) without transformation of variables. We ran models that comprised 1 to 6 clusters. Missing data were supposed missing at random because these missing data were considered independent of the values of the variable but dependent on another variable (e.g., missing values for age at onset of gambling problems were independent of the variable of age at onset of gambling problems, and depended instead on whether or not the participant had ever had gambling problems at all). Missing data were handled with full information maximum likelihood (FIML) estimation. FIML consists of estimating a likelihood function for each individual based on the data that are not missing so that all the available data are used. The Bayesian information criterion (BIC) (a lower BIC indicating a better model) and the classification error rate (which represents the precision of individuals' classification) were used to select the best model. Statistical differences between clusters were assessed by Wald tests. Variables that do not influence the estimation of the model were included as covariates to describe and compare the clusters. For these inactive covariates, a three-step approach [46] was used to test differences between clusters.

### 3. RESULTS

#### 3.1. Descriptive analysis

The sample comprised 256 NPGs, 169 PGWTs, and 203 PGSTs. The sociodemographic data of the whole sample ( $N = 628$ ) are detailed in Table 3. Participants were mainly men ( $N = 418$ , 66.6%), and the mean age was 43.4 years ( $SD = 12.9$ ). Most participants were employed, with a regular income higher than €1,100 (i.e., approximately 1,400 USD).

|                                                | <i>N</i> | %    |
|------------------------------------------------|----------|------|
| <b>Gender</b>                                  |          |      |
| Male                                           | 418      | 66.6 |
| Female                                         | 210      | 33.4 |
| <b>Marital status</b>                          |          |      |
| Single                                         | 313      | 49.9 |
| In a relationship                              | 314      | 50.1 |
| <b>Educational level</b>                       |          |      |
| Below high school graduation                   | 306      | 48.9 |
| Higher than or equal to high school graduation | 320      | 51.1 |
| <b>Professional activity</b>                   |          |      |

1  
2  
3  
4  
5  
6  
7  
8  
9  
10  
11  
12  
13  
14  
15  
16  
17  
18  
19  
20  
21  
22  
23  
24  
25  
26  
27  
28  
29  
30  
31  
32  
33  
34  
35  
36  
37  
38  
39  
40  
41  
42  
43  
44  
45  
46  
47  
48  
49  
50  
51  
52  
53  
54  
55  
56  
57  
58  
59  
60

|                                                                                      |                 |                  |
|--------------------------------------------------------------------------------------|-----------------|------------------|
| Working                                                                              | 398             | 63.5             |
| Not working                                                                          | 229             | 36.5             |
| <b>Level of income</b>                                                               |                 |                  |
| Regular and higher than the French minimum wage<br>(approximately €1100 or 1400 USD) | 440             | 70.1             |
| Others                                                                               | 188             | 29.9             |
|                                                                                      | <b><i>M</i></b> | <b><i>SD</i></b> |
| <b>Age</b>                                                                           | 43.4            | 12.9             |

**Table 3. Descriptive analysis of sociodemographic variables for the whole sample**

### 3.2. Clustering

Gambling characteristics were used for clustering : age at gambling initiation, age at problem gambling onset, duration of gambling history , age at diagnosis of first psychiatric comorbidities (if relevant, History of gambling-free period of at least one month, Familial and social support related to gambling problems, preferred type of gambling, preferred medium of gambling) , Among the six models tested, two were very similar in terms of the BIC indicator: a model with three clusters (BIC = 18253.8) and another with four clusters (BIC = 18252.6). Of these two models, the one with three clusters displayed a lower classification error rate (7.92% vs 13.80% for the four-cluster solution) and was better suited to clinical interpretation. We thus chose the three-cluster partition.

Clinical, socio-professional, psychological variables, and gambling characteristics of the three clusters are presented in Table 4.

|                                                                                        | Cluster 1<br>EOSC | Cluster 2<br>EOLC | Cluster 3<br>LOSC | <i>P</i> -value,<br>Wald test |
|----------------------------------------------------------------------------------------|-------------------|-------------------|-------------------|-------------------------------|
| <b>Cluster size %, <i>N</i></b>                                                        | 47.5 (298)        | 35.0 (220)        | 17.5 (110)        |                               |
| <b><u>VARIABLES INCLUDED IN THE CLUSTERING ANALYSIS</u></b>                            |                   |                   |                   |                               |
| <b>Age at gambling initiation (yrs)</b>                                                | 16.4              | 17.9              | 36.1              | < 0.001                       |
| <b>Age at onset of problem gambling (yrs)</b>                                          | 26.5              | 41.3              | 45.1              | < 0.001                       |
| <b>Duration of gambling history (yrs)</b>                                              | 16.2              | 35.4              | 16.2              | < 0.001                       |
| <b>Age at diagnosis of the first psychiatric comorbidities<br/>(if relevant) (yrs)</b> | 15.3              | 23.7              | 26.5              | < 0.001                       |
| <b>History of gambling-free period of at least one month<br/>(%)</b>                   | 71.0              | 53.6              | 58.3              | 0.001                         |
| <b>Familial and social support related to gambling<br/>problems (%)</b>                | 92.6              | 84.3              | 92.5              | 0.018                         |
| <b>Preferred type of gambling</b>                                                      |                   |                   |                   | < 0.001                       |
| Pure chance games (lotteries, slots, scratch cards,<br>video lottery terminals, etc.)  | 48.2              | 58.2              | 79.8              |                               |
| Bank games with an element of skill (sports betting,<br>horserace betting, blackjack)  | 30.8              | 36.1              | 16.9              |                               |
| Social games with skill (Texas Hold'em and Omaha<br>variants of poker)                 | 21.0              | 5.7               | 3.4               |                               |
| <b>Preferred gambling medium (on the Internet)</b>                                     | 20.0              | 8.1               | 2.3               | < 0.001                       |



| <b><u>CO-VARIABLES (Not included in clustering)</u></b> |       |       |       |         |
|---------------------------------------------------------|-------|-------|-------|---------|
| <b><u>Sociodemographic characteristics</u></b>          |       |       |       |         |
| <b>Gender (%)</b>                                       |       |       |       |         |
| Women                                                   | 23.5  | 32.4  | 62.5  | < 0.001 |
| Men                                                     | 76.5  | 67.6  | 37.5  |         |
| <b>Age (yrs)</b>                                        |       |       |       |         |
|                                                         | 32.7  | 53.4  | 52.3  | < 0.001 |
| <b>Level of income ≥ €1100 (1400 USD) (%)</b>           |       |       |       |         |
|                                                         | 67.2  | 72.8  | 72.4  | 0.250   |
| <b>Marital status (single) (%)</b>                      |       |       |       |         |
|                                                         | 55.4  | 38.7  | 57.0  | < 0.001 |
| <b>Employment status (active) (%)</b>                   |       |       |       |         |
|                                                         | 73.0  | 56.0  | 52.0  | < 0.001 |
| <b><u>Gambling severity</u></b>                         |       |       |       |         |
| <b>Gambling status (%)</b>                              |       |       |       |         |
| Non-problem gamblers (NPG)                              | 48.1  | 51.6  | 55.7  | 0.020   |
| Problem gamblers without treatment (PGWT)               | 16.8  | 23.0  | 21.3  |         |
| Problem gamblers seeking treatment (PGST)               | 35.2  | 25.4  | 23.0  |         |
| <b>Number of DSM-IV criteria (mean)</b>                 |       |       |       |         |
|                                                         | 3.8   | 3.7   | 3.3   | 0.200   |
| <b><u>Gambling habits:</u></b>                          |       |       |       |         |
| <b>Amount wagered monthly in gambling (in euros)</b>    |       |       |       |         |
|                                                         | 592.4 | 632.5 | 512.3 | 0.560   |
| <b>Gambling frequency over the past 12 months (%)</b>   |       |       |       |         |
| Less than once a month                                  | 8.2   | 6.9   | 8.6   | 0.067   |
| More than once a month                                  | 17.6  | 12.9  | 19.2  |         |
| Once a week                                             | 13.2  | 14.6  | 20.6  |         |
| More than once a week                                   | 61.0  | 65.7  | 51.6  |         |
| <b><u>Comorbid psychiatric disorders</u></b>            |       |       |       |         |
| <b>Mood disorders (%)</b>                               |       |       |       |         |
|                                                         | 46.1  | 45.5  | 56.0  | 0.110   |

|    |                                              |      |      |      |         |
|----|----------------------------------------------|------|------|------|---------|
| 1  |                                              |      |      |      |         |
| 2  |                                              |      |      |      |         |
| 3  | Depressive episode (%)                       | 40.2 | 41.7 | 48.6 | 0.260   |
| 4  | Hypomanic or manic episode (%)               | 13.6 | 9.2  | 12.9 | 0.240   |
| 5  |                                              |      |      |      |         |
| 6  |                                              |      |      |      |         |
| 7  |                                              |      |      |      |         |
| 8  | <b>Anxiety disorders (%)</b>                 | 38.2 | 36.4 | 40.0 | 0.780   |
| 9  |                                              |      |      |      |         |
| 10 | Panic disorder (with or without agoraphobia) | 18.4 | 21.4 | 25.4 | 0.220   |
| 11 | Social phobia                                | 11.7 | 8.4  | 15.9 | 0.082   |
| 12 | Obsessive Compulsive disorder                | 3.8  | 2.5  | 1.0  | 0.360   |
| 13 | Generalised Anxiety Disorder                 | 17.4 | 12.0 | 11.7 | 0.08    |
| 14 | Post-Traumatic Stress Disorder               | 7.2  | 6.3  | 9.7  | 0.490   |
| 15 |                                              |      |      |      |         |
| 16 |                                              |      |      |      |         |
| 17 |                                              |      |      |      |         |
| 18 |                                              |      |      |      |         |
| 19 |                                              |      |      |      |         |
| 20 |                                              |      |      |      |         |
| 21 |                                              |      |      |      |         |
| 22 | <b>Addictive disorders (%)</b>               | 42.7 | 32.8 | 19.8 | < 0.001 |
| 23 | Alcohol Use Disorder                         | 28.7 | 27.0 | 13.7 | 0.007   |
| 24 | Substance Use Disorder                       | 25.5 | 10.1 | 6.1  | < 0.001 |
| 25 |                                              |      |      |      |         |
| 26 |                                              |      |      |      |         |
| 27 |                                              |      |      |      |         |
| 28 | <b>Antisocial personality disorder (%)</b>   | 5.5  | 3.3  | 1.1  | 0.220   |
| 29 |                                              |      |      |      |         |
| 30 |                                              |      |      |      |         |
| 31 |                                              |      |      |      |         |
| 32 | <b>Current suicide risk (%)</b>              | 19.4 | 26.7 | 29.5 | 0.027   |
| 33 | <b>Lifetime suicide attempts (%)</b>         | 11.4 | 18.2 | 15.4 | 0.055   |
| 34 |                                              |      |      |      |         |
| 35 |                                              |      |      |      |         |
| 36 |                                              |      |      |      |         |
| 37 | <b>ADHD</b>                                  | 31.7 |      |      |         |
| 38 | WURS score (M)                               |      | 28.7 | 28.3 | 0.096   |
| 39 |                                              |      |      |      |         |
| 40 |                                              |      |      |      |         |
| 41 |                                              |      |      |      |         |
| 42 | <b><u>Personality</u></b>                    |      |      |      |         |
| 43 |                                              |      |      |      |         |
| 44 |                                              |      |      |      |         |
| 45 | <b>TCI scores (M)</b>                        | 54.9 | 51.5 | 48.6 | 0.001   |
| 46 | Novelty Seeking (NS)                         | 43.7 | 44.7 | 42.8 | 0.730   |
| 47 | Harm Avoidance (HA)                          | 67.8 | 67.0 | 68.7 | 0.720   |
| 48 | Determination (D)                            | 73.6 | 73.5 | 75.6 | 0.450   |
| 49 | Cooperation (C)                              | 60.8 | 59.1 | 60.7 | 0.460   |
| 50 | Reward Dependence (RD)                       | 27.7 | 33.8 | 36.7 | < 0.001 |
| 51 | Transcendence (T)                            | 52.8 | 55.9 | 59.2 | 0.069   |
| 52 | Persistence (P)                              |      |      |      |         |
| 53 |                                              |      |      |      |         |
| 54 |                                              |      |      |      |         |
| 55 |                                              |      |      |      |         |
| 56 |                                              |      |      |      |         |
| 57 |                                              |      |      |      |         |
| 58 |                                              |      |      |      |         |
| 59 |                                              |      |      |      |         |
| 60 |                                              |      |      |      |         |

|  |  |  |  |  |
|--|--|--|--|--|
|  |  |  |  |  |
|--|--|--|--|--|

**Table 4. Profiles of the three clusters identified**

We identified three clusters with significant differences among the courses of gambling. Figure 1 represents the **three clusters** and the **significant variables and covariables**.

*The Early Onset and Short Course (EOSC) cluster (47.5%)*

This group was predominantly represented by young men (76.5% men, mean age 32.7). This group was more active than the others (73.0% were active), and more than half were single (55.4%). This cluster has the lowest onset age (16.4 years old) and the earliest beginning of problem gambling (26.5 years old). Problem gambling thus appeared approximately 10 years after gambling initiation. Moreover, psychiatric comorbidities appeared earlier in life (15.3 years). Nearly half of this cluster (46.1%) had a history of mood disorders, with the highest frequency of lifetime hypomanic or manic episodes (13.6%). This cluster had significantly the highest level of Novelty Seeking ( $M = 54.9$ ). Addictive comorbidities were also more prevalent in this group, with 28.7% and 25.5%, respectively, reporting an alcohol use disorder and a substance use disorder. This group was the only one with a majority of PG (52%) and had the highest proportion of PGST (35.2%). Seventy-one percent had already experienced at least one month without gambling, which was significantly higher than in other groups. For the two other clusters, the favourite type of gambling was predominantly pure chance games (48.2%). However, contrariwise, a majority of these gamblers identified strategic games (regrouping bank games with an element of skill and social games with skill) as their preferred gambling type (51.8%). Moreover, 20% preferred gambling on the Internet, a higher proportion than in the other clusters.

*The Early Onset and Long Course (EOLC) cluster (35.0%)*

This group was also predominantly constituted by men (67.6%), but was older than in the EOSC cluster ( $M = 53.4$  years old). The majority lived with a partner (61.3%), contrary to the two other clusters, even though they were those who reported the lowest frequency of familial support (84.3%). The mean gambling onset age was 17.9 years. Problem gambling in problem gamblers

1  
2  
3 appeared 23.4 years after gambling initiation, and the mean duration of the gambling practice at the  
4 moment of the inclusion was 35.4 years, which was more than twice the length for the two other  
5 clusters. 45.5% presented mood disorders and 36.4% anxiety disorders. Alcohol use disorders were  
6 quite prevalent in this cluster (27.0%). Psychiatric comorbidities appeared late in life, with the mean  
7 age of the first diagnosis of psychiatric comorbidity being 23.7 years, much older than the mean age  
8 of gambling initiation. They had the highest prevalence of suicidal attempts (18.2%) and a higher  
9 frequency of current suicidal risk than the EOSC cluster (26.7%). They had the lowest prevalence of  
10 gamblers having experienced a gambling cessation for at least one month (53.6%). The majority  
11 (51.6%) of this cluster was NPG, and the proportion of PGWT was the highest in this group (23.0%).  
12 This group had the highest proportion of bank games with an element of skill as the preferred  
13 gambling type (36.1%). Slightly less than 10% preferred Internet gambling.  
14  
15  
16  
17  
18  
19  
20  
21  
22

#### *The Late Onset and Short Course (LOSC) cluster (17.5%)*

23  
24  
25 This group was the only one predominantly constituted by women (62.5%), with a mean age of 52.3  
26 years old. However, the majority lived alone (57.0%), and this cluster had the lowest prevalence of  
27 active employment (52.0%). The mean age of gambling initiation was 36.1 years old, significantly  
28 older than the other two groups. However, the gambling course between the mean age of initiation  
29 and the mean age of problem gambling was the shortest among the whole sample: 9 years.  
30 Psychiatric comorbidities were more prevalent in this group; 56.0% had a history of mood disorders,  
31 especially a high prevalence of lifetime depressive disorder (48.6%). 29.5% reported a current  
32 suicidal risk, more than the two other groups. Psychiatric comorbidities appeared later in life. Indeed,  
33 the mean age of the first diagnosis of psychiatric comorbidity was 26.5 years old. The frequency of  
34 addictive disorders was the lowest in this group (19.8%). They displayed significantly the highest  
35 personality scores for transcendence ( $M = 36.7$ ). In this cluster, the frequency of NPG was the highest  
36 (55.7%), and the problem gamblers were equally either seeking treatment (23.0%) or not (21.3%).  
37 The preferred type of gambling was predominantly pure chance games for 79.8% of the cluster, and  
38 only 2.3% preferred Internet gambling.  
39  
40  
41  
42  
43  
44  
45  
46  
47  
48  
49  
50  
51  
52

#### **FIGURE 1.**

## **4. DISCUSSION**

### **4.1. Main findings**

#### **4.1.1. Three different profiles of gamblers**

1  
2  
3 Three distinct clinical profiles of gamblers were identified through the analysis of gambling  
4 characteristics. Differences in the course and characteristics of gambling corresponded to  
5 psychopathological profiles, and they were significant in terms of socio-demographic variables  
6 (gender, age, work, and marital status) and also in terms of gambling status and some comorbidities  
7 (addictive disorders, hypomanic episodes, and personality traits). We propose a classification of our  
8 clusters according to gambling characteristics: Early Onset and Short Course (EOSC) (Cluster 1), Early  
9 Onset and Long Course (EOLC) (Cluster 2), and Late Onset and Short Course (Cluster 3). Regarding  
10 significant clinical and psychopathological covariables, this three-cluster model defined through the  
11 analysis of gambling characteristics is partly comparable to the theoretical pathways model of  
12 Blaszczynski and Nower [17], which was in turn defined through psychopathological variables.  
13  
14  
15  
16  
17  
18  
19

### 20 21 *The Early Onset and Short Course cluster (Cluster 1-EOSC)*

22  
23 The mean age at gambling initiation is under 18 years, which is the legal age for gambling in France.  
24 Lynch *et al.* found that young adults who had started gambling prior to the age of 18 were more  
25 likely to experience at least one symptom of GD than those who started gambling at the age of 18 or  
26 later [47]. Early initiation is described as a marker of risk of GD in later life: Kessler *et al.* (2008) found  
27 that the mean age at the onset of gambling was significantly lower among those who subsequently  
28 developed pathological gambling than among those who did not [48, 49], and Jimenez *et al.*  
29 identified a younger age at the onset of gambling as associated with a greater severity of pathological  
30 gambling. Our results agreed with this hypothesis: the EOSC group had a higher frequency of  
31 problem gambling and higher gambling severity than the two other groups. Nevertheless, age at  
32 initiation did not explain the course of gambling in itself: the two clusters associated with the earlier  
33 age at onset presented two different courses of gambling, either a short development  
34 (approximately 10 years) for the EOSC cluster or a long development (approximately 23 years) for the  
35 EOLC cluster.  
36  
37  
38  
39  
40  
41  
42  
43  
44  
45

46 This cluster had a significantly higher preference for online gambling than the others. Gambling on  
47 the Internet is associated with a high availability of gambling opportunity, and online poker induces  
48 specific problems, leading problem gamblers to lose money but also to spend a large amount of time  
49 gambling [50]. Moreover, involvement in gambling and attraction to strategic games are risk factors  
50 for problem gambling [51]. Male Internet bettors face heightened risks of related gambling problems  
51 [52]. Mirroring the comments made above regarding EGM players, much may depend on the  
52 patterns of use exhibited by online sports bettors. For example, if online betting is done sporadically  
53 in a social context (e.g., watching a game together), then online play may represent no extra risk over  
54 venue-based play. On the other hand, if online sports betting facilitates different patterns of use  
55  
56  
57  
58  
59  
60

1  
2  
3 (e.g., solitary betting in extended sessions late at night), then this would provide further evidence  
4 that the online product presents a greater risk. At the present time, concern appears to be justified,  
5 as young men in particular are increasingly seeking treatment for difficulties in controlling their  
6 online sports betting [53]  
7  
8

9  
10 Strategic games usually attract young males, with an earlier onset of the disorder [54]. They tend to  
11 engage in more than one specific type of problematic game and to take more risks, including betting  
12 large amounts of money [54]. This cluster included the highest frequency of PG and the highest  
13 frequency of PGST, and they most frequently indicated the occurrence of gambling-free periods of  
14 one month, probably in an effort to regain control over gambling or in reaction to negative  
15 consequences.  
16  
17  
18

19  
20  
21 The EOSC cluster presented the highest level of ADHD symptomatology. One may suppose that  
22 psychopathological variables combined with age at onset may influence the course of gambling, as  
23 defined in the pathways model [17]. Impulsivity is also a key point of the antisocial impulsivist  
24 pathway, defined by Blaszczynski and Nower as being associated with gambling-related criminal  
25 behaviours and addictive comorbidities [17]. Novelty seeking was also high in our study, as reported  
26 in the literature, especially in social games with skill [54, 55]. This was associated with a high  
27 prevalence of psychiatric and addictive comorbidities, as previously described for PG with impulsivity  
28 and ADHD [17, 56, 57].  
29  
30  
31  
32  
33

### 34 35 *EOLC cluster (Cluster 2)* 36

37  
38 The EOLC cluster had a long course of gambling (35.4 years). They spent the highest amount of  
39 money on gambling, and only 53.6% had experienced a gambling cessation for at least one month.  
40 We found important results concerning familial support: although EOLC gamblers lived  
41 predominantly with partners, they reported the lowest level of familial and social support related to  
42 gambling problems. We hypothesise that gambling had severe consequences on the family, as shown  
43 in the literature [58, 59], thus reducing familial support.  
44  
45  
46

47  
48 An important characteristic is the absence of any lifetime premorbid feature of psychopathology  
49 before the onset of the gambling problem. We may hypothesise that symptoms of anxiety or  
50 depression were the consequences of problem-gambling-related difficulties. However, at inclusion,  
51 they presented the highest prevalence of attempted suicide (and a current suicide risk in 26.7% of  
52 cases). One can assume suicide risk and attempted suicides to be consequences of problem-  
53 gambling-related difficulties [60]. The EOLC cluster could share similarities with the first pathway,  
54 defined by Blaszczynski and Nower as 'conditioned problem gamblers' (CG). This CG group is defined  
55  
56  
57  
58  
59  
60

1  
2  
3 as gamblers without comorbidities who are preoccupied with gambling, engage in chasing, and  
4 fluctuate between excessive gambling and problem gambling.  
5  
6  
7

### 8 *The LOSC cluster (Cluster 3)*

9

10 The LOSC gamblers predominantly preferred pure chance games. Different studies have shown that  
11 gamblers who preferred slot machines had higher levels of depression [25, 61].  
12

13 We can underline two notable points in our LOSC cluster. First, women made up the majority of the  
14 LOSC cluster (62.5%), and in this cluster the course of gambling was the shortest observed in our  
15 study. These results support the concept of a 'telescoping effect' in the course of problem gambling  
16 among women [62-64]. In the literature, this effect was indicated by female gamblers seeking  
17 treatment [65, 66] but was not confirmed in the general population [67]. In our study, we included a  
18 mixed population of gamblers (NPG, PGWT, and PGST), and our sample also consisted of gamblers  
19 who were somewhat older ( $M = 52$  years in the LOSC cluster) than in the Slustke sample [67].  
20

21 Second, the LOSC gamblers had the highest mean age at gambling initiation but also the shortest  
22 gambling trajectory. As a consequence, we could conclude that the course of gambling and the risk of  
23 problem gambling were not systematically linked to an early age of onset, but perhaps to a  
24 combination of psychopathological variables, age at initiation, gender, and type of gambling, as  
25 hypothesised in some studies [20, 21].  
26

27 This cluster presented premorbid anxiety and/or depression: 56.0% had a lifetime history of mood  
28 disorder, with 29.5% experiencing a current suicide risk, which are the highest percentages of our  
29 sample. This cluster was also notable for the lowest frequency of seeking treatment. Suicide risk is  
30 one of the main dramatic consequences of gambling [60], and suicidal thoughts can lead to giving up  
31 gambling and accepting treatment. This course of gambling characteristic could support the  
32 hypothesis that participation in gambling is motivated by desire on the part of gamblers to modulate  
33 their emotional distress and their negative feelings [17]. The LOSC cluster might share similarities  
34 with the pathway of 'emotionally vulnerable problem gamblers' (EV) [17, 27, 28].  
35

### 36 **4.2. Strengths and weaknesses of this study**

37

38 This study has several limitations, especially the relatively restricted amount of data collected.  
39 Characteristics related to the course of gambling (age at initiation, age at onset of gambling  
40 problems, etc.) and lifetime psychiatric disorders were assessed in a retrospective manner and were  
41 self-reported, which could induce a recall bias. Moreover, we did not use DSM 5 criteria, and we did  
42 not analyse impulsivity and cognitive distortions in this population. Recruitment of patients occurred  
43  
44  
45  
46  
47  
48  
49  
50  
51  
52  
53  
54  
55  
56  
57  
58  
59  
60

1  
2  
3 at the moment of the legalisation of online gambling in France (2010), which limits generalisation, as  
4 online gambling has since become widely available. However, the combination of NPGs and PGs who  
5 have and who have not sought treatment is one of the main strengths of our study. We also included  
6 gamblers recruited directly from gambling locations. This method gave us access to a broad spectrum  
7 of gambling activities. Finally, this sample size has rarely been achieved by studies with semi-  
8 structured interviews (studies with such high numbers of participants are generally based on  
9 telephone-based surveys).

10 That study more accurately categorised profiles of gamblers and problem gamblers through gambling  
11 characteristics and course. It did not examine factors that increase the risk of transitioning from a  
12 non-problem gambler to a problem gambler, nor did it define vulnerability profiles associated with  
13 the emergence of problem gambling in a longitudinal study.

#### 23 **4.3. Implications for clinicians and policymakers**

24 It is important to consider gambling characteristics because preventive interventions or policy  
25 measures may reduce the risk of problem gambling or minimise harm from gambling [7]. We defined  
26 a clustering of gamblers through the analysis of variables which were easy to identify by psychiatrists  
27 or physicians in primary care: gambling characteristics, age at gambling initiation, type of gambling  
28 and gambling medium, duration of gambling activities, age at onset of psychiatric comorbidities, and  
29 history of gambling-free periods of at least one month's duration. We hypothesise that simple  
30 pointers concerning these gambling characteristics could be constructed to prevent PG and to help  
31 PG identification.

32 Prevention interventions should be tailored to these at-risk profiles. The preceding results imply that  
33 interventions need to particularly target prevention at different profiles: young adult males gambling  
34 online in strategic games, for example, or middle-aged women gambling offline to hazardous games.  
35 Public health messages should be available online and offline which are adapted to these profiles.  
36 Clinical programmes could also be adapted to these specific profiles, for we may suppose that with  
37 respect to the respective cognitive distortions, motivational training would certainly differ between  
38 these profiles.

39 The gambling characteristics identified in this study as significantly different between the three  
40 clusters are easily identified but could also be target of specific intervention to reduce harm in  
41 gambling, especially in at-risk profiles.



1  
2  
3 We demonstrated that a large majority of gamblers in this sample started to **gamble before the legal**  
4 **age of 18 years**. For gambling prevention policy, it is worth noting that despite the ban on gambling  
5 under 18 years of age, minors can gamble very early. We stress the need to develop early  
6 interventions to provide information and prevent gambling, especially among adolescents.  
7 Prevention programmes could include targeted interventions for youth to explain gambling risks and  
8 how to avoid them. One explanation for the framing of risky gambling behaviour of youth may be  
9 gambling advertising and availability. Gambling marketing is present in many media (advertising  
10 posters, the Internet, magazines, television, etc.) that are accessible to adolescents, and its content is  
11 very attractive. A recent study showed that marketing significantly influences attitudes towards  
12 gambling, gambling behaviours, and intention to participate [68].  
13  
14  
15  
16  
17  
18  
19  
20

21 We also should pay attention to the **type of gambling and the medium used for gambling**. In our  
22 study, strategic games and Internet gambling seemed to be associated with more serious gambling  
23 profiles and short courses of gambling development in younger men. Targeted prevention on the  
24 Internet, especially regarding strategic games, could be developed to reduce harm from gambling.  
25 Contrariwise, a large majority of the LOSC cluster preferred to gamble in pure chance games offline.  
26 Unlike casino or Internet games, pure chance offline games (especially scratch games) in France do  
27 not include any self-exclusion programmes, and identity controls are not systematic when a ban is in  
28 place. Consequently, French gamblers with gambling problems participating in pure chance games  
29 offline are less able to put in place safeguards that may help them to quit or reduce gambling. This  
30 point is a public health concern, particularly when we consider, as in our study, that gambling  
31 problems occur in vulnerable persons. These results raise questions about the need for governments  
32 to develop policies and regulations to reduce young people's exposure to gambling products and  
33 marketing and to protect vulnerable persons from harm caused by gambling.  
34  
35  
36  
37  
38  
39  
40  
41  
42  
43  
44  
45  
46

47 Caption : figure 1 . clustering : 3 clusters and significant variables and covariables  
48  
49  
50  
51  
52  
53  
54  
55  
56  
57  
58  
59  
60

## REFERENCES

1. Calado, F. and M.D. Griffiths, *Problem gambling worldwide: An update and systematic review of empirical research (2000-2015)*. J Behav Addict, 2016. **5**(4): p. 592-613.
2. Costes, J.-M., et al., *Gambling Patterns and Problems of Gamblers on Licensed and Unlicensed Sites in France*. Journal of Gambling Studies / Co-Sponsored by the National Council on Problem Gambling and Institute for the Study of Gambling and Commercial Gaming, 2015.
3. Shaffer, H.J. and D.A. Korn, *Gambling and related mental disorders: a public health analysis*. Annu Rev Public Health, 2002. **23**: p. 171-212.
4. Williams, R.J., R.A. Volberg, and R.M.G. Stevens. *The population prevalence of problem gambling : methodological influences, standardized rates, jurisdictional differences, and worldwide trends*. Report prepared for the Ontario Problem Gambling Research Centre and the Ontario Ministry of Health and Long term Care 2012.
5. The, L., *Problem gambling is a public health concern*. Lancet, 2017. **390**(10098): p. 913.
6. Hing, N., et al., *Maintaining and losing control during internet gambling : a qualitative study of gamblers' experience* New media Soc. , 2014. **17**: p. 1075-1095.
7. Hing, N., A.M. Russell, and M. Browne, *Risk Factors for Gambling Problems on Online Electronic Gaming Machines, Race Betting and Sports Betting*. Front Psychol, 2017. **8**: p. 779.
8. De Luigi, N., et al., *Patterns of Gambling Activities and Gambling Problems Among Italian High School Students: Results from a Latent Class Analysis*. J Gambl Stud, 2017.
9. American Psychiatric Association, *Diagnostic and statistical manual of mental disorders (5th ed.)*. . 2013, Washington, DC.
10. Stucki, S. and M. Rihs-Middel, *Prevalence of adult problem and pathological gambling between 2000 and 2005: an update*. J Gambl Stud, 2007. **23**(3): p. 245-57.
11. Bruneau, M., et al., *Gambling transitions among adult gamblers: A multi-state model using a Markovian approach applied to the JEU cohort*. Addict Behav, 2016. **57**: p. 13-20.
12. Wardle, H., et al., *The British Gambling prevalence survey 2010*. 2011: London : The Stationery Office
13. Costes, J.M., et al., *Levels and gambling practices in 2010* Lettre tendances 2011. **77**: p. 1-8.
14. Abbott, M.W., U. Romild, and R.A. Volberg, *Gambling and problem gambling in Sweden: changes between 1998 and 2009*. J Gambl Stud, 2014. **30**(4): p. 985-99.
15. Guillou Landreat, M., et al., *[Gambling in elderly patients]*. Soins Gerontol, 2017. **22**(123): p. 35-37.
16. Caillon, J., et al., *[Pathological gambling in adolescence]*. Arch Pediatr, 2012. **19**(2): p. 173-9.
17. Blaszczynski, A. and L. Nower, *A pathways model of problem and pathological gambling*. Addiction (Abingdon, England), 2002. **97**(5): p. 487-499.
18. Valleur, M., et al., *Towards a Validation of the Three Pathways Model of Pathological Gambling*. J Gambl Stud, 2016. **32**(2): p. 757-71.
19. Ledgerwood, D.M. and N.M. Petry, *Subtyping pathological gamblers based on impulsivity, depression, and anxiety*. Psychol Addict Behav, 2010. **24**(4): p. 680-8.
20. Jimenez-Murcia, S., et al., *Mediational Role of Age of Onset in Gambling Disorder, a Path Modeling Analysis*. J Gambl Stud, 2016. **32**(1): p. 327-40.
21. Jimenez-Murcie, S., et al., *Age of onset in pathological gambling : clinical, therapeutic and personality correlates* J Gambl Stud, 2010. **26**(2): p. 235-48.
22. Burge, A.N., et al., *Age of gambling initiation and severity of gambling and health problems among older adult problem gamblers*. Psychiatr Serv, 2004. **55**(12): p. 1437-9.
23. Burge, A.N., R.H. Pietrzak, and N.M. Petry, *Pre/early adolescent onset of gambling and psychosocial problems in treatment-seeking pathological gamblers*. J Gambl Stud, 2006. **22**(3): p. 263-74.

- 1
  - 2
  - 3
  - 4
  - 5
  - 6
  - 7
  - 8
  - 9
  - 10
  - 11
  - 12
  - 13
  - 14
  - 15
  - 16
  - 17
  - 18
  - 19
  - 20
  - 21
  - 22
  - 23
  - 24
  - 25
  - 26
  - 27
  - 28
  - 29
  - 30
  - 31
  - 32
  - 33
  - 34
  - 35
  - 36
  - 37
  - 38
  - 39
  - 40
  - 41
  - 42
  - 43
  - 44
  - 45
  - 46
  - 47
  - 48
  - 49
  - 50
  - 51
  - 52
  - 53
  - 54
  - 55
  - 56
  - 57
  - 58
  - 59
  - 60
24. Gainsbury, S.M., et al., *The interaction between gambling activities and modes of access: a comparison of Internet-only, land-based only, and mixed-mode gamblers*. *Addict Behav*, 2015. **41**: p. 34-40.
25. Challet-Bouju, G., et al., *A Gamblers Clustering Based on Their Favorite Gambling Activity*. *J Gambl Stud*, 2015. **31**(4): p. 1767-88.
26. Dufour, M.C., L. Archer, and E. Gordis, *Alcohol and the elderly*. *Clin Geriatr Med*, 1992. **8**(1): p. 127-41.
27. Moon, M., et al., *Subtyping Non-treatment-seeking Problem Gamblers Using the Pathways Model*. *J Gambl Stud*, 2017. **33**(3): p. 841-853.
28. Nower, L. and A. Blaszczynski, *Development and validation of the Gambling Pathways Questionnaire (GPQ)*. *Psychol Addict Behav*, 2017. **31**(1): p. 95-109.
29. Suomi, A., N.A. Dowling, and A.C. Jackson, *Problem gambling subtypes based on psychological distress, alcohol abuse and impulsivity*. *Addict Behav*, 2014. **39**(12): p. 1741-5.
30. Nower, L., et al., *Subtypes of disordered gamblers: results from the National Epidemiologic Survey on Alcohol and Related Conditions*. *Addiction*, 2013. **108**(4): p. 789-98.
31. Mallorqui-bagué, N., et al., *Cognitive deficits in executive functions and decision-making impairments cluster gambling disorder sub-types* *J Gambl Stud* 2018. **34**(1): p. 209-223.
32. Challet-Bouju, G., et al., *Study protocol: the JEU cohort study--transversal multiaxial evaluation and 5-year follow-up of a cohort of French gamblers*. *BMC Psychiatry*, 2014. **14**: p. 226.
33. Toce-Gerstein, M., D.R. Gerstein, and R.A. Volberg, *A hierarchy of gambling disorders in the community*. *Addiction*, 2003. **98**(12): p. 1661-1672.
34. Potenza, M.N., *Should addictive disorders include non-substance-related conditions?* *Addiction*, 2006. **101 Suppl 1**: p. 142-51.
35. Toneatto, T. and G. Millar, *Assessing and treating problem gambling: empirical status and promising trends*. *Canadian Journal of Psychiatry. Revue Canadienne De Psychiatrie*, 2004. **49**(8): p. 517-525.
36. Boutin, C., " *Le jeu: chance ou stratégie. Choisir librement la place du jeu dans votre vie*" , ed. L.éd. l'homme. 2010, Quebec
37. Lecrubier, Y., et al., *The Mini International Neuropsychiatric Interview (MINI). A short diagnostic structured interview: reliability and validity according to the CIDI*. *European Psychiatry*, 1997. **12**(5): p. 224-231.
38. Ward, M.F., P.H. Wender, and F.W. Reimherr, *The Wender Utah Rating Scale: an aid in the retrospective diagnosis of childhood attention deficit hyperactivity disorder*. *The American Journal of Psychiatry*, 1993. **150**(6): p. 885-890.
39. Caci, H.M., J. Bouchez, and F.J. Baylé, *An aid for diagnosing attention-deficit/hyperactivity disorder at adulthood: psychometric properties of the French versions of two Wender Utah Rating Scales (WURS-25 and WURS-K)*. *Comprehensive Psychiatry*, 2010. **51**(3): p. 325-331.
40. De Fruyt, F., L. Van De Wiele, and C. Van Heeringen, *Cloninger's Psychobiological Model of Temperament and Character and the Five-Factor Model of Personality*. *Personality and Individual Differences*, 2000. **29**(3): p. 441-452.
41. Cloninger, C., D.M. Svrakic, and T.R. Przybeck, *A psychobiological model of temperament and character*. *Archives of General Psychiatry*, 1993. **50**(12): p. 975-990.
42. N Chakroun-Vinciguerra, M.F., *French validation of a short version of the Temperament and Character Inventory (TCI-125)*. *Journal de Thérapie Comportementale et Cognitive*, 2005. **15**(1): p. 27-33.
43. Vermunt, J.K. and J. Magidson, *Latent class cluster analysis in Applied Latent Class Analysis* C.U. Press, Editor. 2002, Hagenaaars, J.A.
- McCutcheon, A.L.: Cambridge p. 89-106.
44. Vermunt, J.K. and J. Magidson, *Upgrade Manual for Latent GOLD 5.1 Belmont Massachusetts: Statistical Innovations Inc., in Statistical Innovations* 2016.

- 1
- 2
- 3
- 4 45. Magidson, J. and J.K. Vermunt, *Latent class models for clustering: a comparison with K-means*. Canadian Journal of Marketing Research, 2002. **20**: p. 36-43.
- 5
- 6 46. Vermunt, J.K., *Latent Class Modeling with Covariates: Two Improved Three-Step Approaches*. Political Analysis, 2010. **18**: p. 450-469.
- 7
- 8 47. Lynch, W.J., P.K. Maciejewski, and M.N. Potenza, *Psychiatric correlates of gambling in adolescents and young adults grouped by age at gambling onset*. Arch Gen Psychiatry, 2004. **61**(11): p. 1116-22.
- 9
- 10
- 11 48. Kessler, R.C., et al., *DSM-IV pathological gambling in the National Comorbidity Survey Replication*. Psychol Med, 2008. **38**(9): p. 1351-60.
- 12
- 13 49. Slutske, W.S., et al., *Test of a potential causal influence of earlier age of gambling initiation on gambling involvement and disorder: a multilevel discordant twin design*. Psychol Addict Behav, 2014. **28**(4): p. 1177-89.
- 14
- 15
- 16 50. Bonnaire, C., *[Internet gambling: what are the risks?]*. Encephale, 2012. **38**(1): p. 42-9.
- 17 51. Mouneyrac, A., et al., *Cognitive Characteristics of Strategic and Non-strategic Gamblers*. J Gambl Stud, 2017.
- 18
- 19
- 20 52. Milner, L., et al., *An exploratory study of embedded gambling promotion in Australian football television broadcasts*. Communication, Politics and Culture, 2013. **46**: p. 177-198.
- 21
- 22 53. Blaszczynski A. and H. C., *Online Sports Betting has Created New Generation of Problem Gamblers*, ed. T.U.o. Sydney. 2011, Sydney NSW.
- 23
- 24 54. Moragas, L., et al., *Comparative analysis of distinct phenotypes in gambling disorder based on gambling preferences*. BMC Psychiatry, 2015. **15**: p. 86.
- 25
- 26 55. Bonnaire, C., M. Lejoyeux, and R. Dardennes, *Sensation seeking in a French population of pathological gamblers: comparison with regular and nongamblers*. Psychol Rep, 2004. **94**(3 Pt 2): p. 1361-71.
- 27
- 28
- 29
- 30 56. Brandt, L. and G. Fischer, *Adult ADHD Is Associated With Gambling Severity and Psychiatric Comorbidity Among Treatment-Seeking Problem Gamblers*. J Atten Disord, 2017: p. 1087054717690232.
- 31
- 32
- 33 57. Grall-Bronnec, M., et al., *Attention deficit hyperactivity disorder among pathological and at-risk gamblers seeking treatment: a hidden disorder*. European Addiction Research, 2011. **17**(5): p. 231-240.
- 34
- 35
- 36 58. Dowling, N.A., et al., *The impacts of problem gambling on concerned significant others accessing web-based counselling*. Addict Behav, 2014. **39**(8): p. 1253-7.
- 37
- 38 59. Chan, E.M., et al., *Gambling related family coping and the impact of problem gambling on families in Hong Kong*. Asian J Gambl Issues Public Health, 2016. **6**(1): p. 1.
- 39
- 40 60. Guillou-Landreat, M., et al., *Factors associated with suicidal risk among a French cohort of problem gamblers seeking treatment*. Psychiatry Res, 2016. **240**: p. 11-18.
- 41
- 42 61. Bonnaire, C., C. Bungener, and I. Varescon, *Subtypes of French pathological gamblers: comparison of sensation seeking, alexithymia and depression scores*. J Gambl Stud, 2009. **25**(4): p. 455-71.
- 43
- 44
- 45
- 46 62. Bouju, G., et al., *Jeu pathologique : facteurs impliqués*. 2011.
- 47 63. Grall-Bronnec, M., et al., *Clinical profiles as a function of level and type of impulsivity in a sample group of at-risk and pathological gamblers seeking treatment*. Journal of Gambling Studies / Co-Sponsored by the National Council on Problem Gambling and Institute for the Study of Gambling and Commercial Gaming, 2012. **28**(2): p. 239-252.
- 48
- 49
- 50 64. Zakiniaez, Y., et al., *Does Telescoping Exist in Male and Female Gamblers? Does It Matter?* Front Psychol, 2017. **8**: p. 1510.
- 51
- 52 65. Grant, J.E., B.L. Odlaug, and M.E. Mooney, *Telescoping phenomenon in pathological gambling: association with gender and comorbidities*. J Nerv Ment Dis, 2012. **200**(11): p. 996-8.
- 53
- 54
- 55
- 56 66. Potenza, M.N., et al., *Gender-Related Differences in the Characteristics of Problem Gamblers Using a Gambling Helpline*. American Journal of Psychiatry, 2001. **158**(9): p. 1500-1505.
- 57
- 58
- 59
- 60

- 1  
2  
3 67. Slutske, W.S., et al., *Telescoping and gender differences in the time course of disordered*  
4 *gambling: evidence from a general population sample*. *Addiction*, 2015. **110**(1): p. 144-51.  
5 68. Pitt, H., et al., *Factors that influence children's gambling attitudes and consumption*  
6 *intentions: lessons for gambling harm prevention research, policies and advocacy strategies*.  
7 *Harm Reduct J*, 2017. **14**(1): p. 11.  
8  
9  
10  
11  
12  
13  
14  
15  
16  
17  
18  
19  
20  
21  
22  
23  
24  
25  
26  
27  
28  
29  
30  
31  
32  
33  
34  
35  
36  
37  
38  
39  
40  
41  
42  
43  
44  
45  
46  
47  
48  
49  
50  
51  
52  
53  
54  
55  
56  
57  
58  
59  
60

For peer review only

Figure 1. Clustering : 3 clusters and significant variables and covariables



figure 1 . clustering : 3 clusters and significant variables and covariables

209x296mm (300 x 300 DPI)

# BMJ Open

## Problem and non-problem gamblers: A cross-sectional clustering study by gambling characteristics

|                                 |                                                                                                                                                                                                                                                                                                                                                                                                                                                                                                                                                                                                                                                                                                                                                                                                                                                                                                                                                                                                                                                                                                                                                                                                                                                         |
|---------------------------------|---------------------------------------------------------------------------------------------------------------------------------------------------------------------------------------------------------------------------------------------------------------------------------------------------------------------------------------------------------------------------------------------------------------------------------------------------------------------------------------------------------------------------------------------------------------------------------------------------------------------------------------------------------------------------------------------------------------------------------------------------------------------------------------------------------------------------------------------------------------------------------------------------------------------------------------------------------------------------------------------------------------------------------------------------------------------------------------------------------------------------------------------------------------------------------------------------------------------------------------------------------|
| Journal:                        | <i>BMJ Open</i>                                                                                                                                                                                                                                                                                                                                                                                                                                                                                                                                                                                                                                                                                                                                                                                                                                                                                                                                                                                                                                                                                                                                                                                                                                         |
| Manuscript ID                   | bmjopen-2019-030424.R2                                                                                                                                                                                                                                                                                                                                                                                                                                                                                                                                                                                                                                                                                                                                                                                                                                                                                                                                                                                                                                                                                                                                                                                                                                  |
| Article Type:                   | Original research                                                                                                                                                                                                                                                                                                                                                                                                                                                                                                                                                                                                                                                                                                                                                                                                                                                                                                                                                                                                                                                                                                                                                                                                                                       |
| Date Submitted by the Author:   | 25-Nov-2019                                                                                                                                                                                                                                                                                                                                                                                                                                                                                                                                                                                                                                                                                                                                                                                                                                                                                                                                                                                                                                                                                                                                                                                                                                             |
| Complete List of Authors:       | <p>guillou landreat, morgane ; Universite de Bretagne Occidentale, ERCR SPURBO; CHRU de Brest, addictive disorders department<br/> chereau Boudet , isabelle; chu Clermont ferrand , addictology and psychiatry department<br/> perrot, bastien; Université de Nantes, UMR 1246 SPHERE<br/> Romo, Lucia; Universite Paris-Nanterre, EA 4430 CLIPSYD "clinique psychiatrique developpement"; Hospital Louis-Mourier, addictive disorders<br/> codina , irene ; GPS Perray-Vaucluse<br/> magalon , david ; Hopital Sainte-Marguerite, department of adult psychiatry<br/> fatseas , melina ; University of Bordeaux, psychiatric laboratory SANPSY USR 3413; Hospital Centre Charles Perrens, addictive disorders<br/> Luquiens, Amandine; 1. Hôpital Paul Brousse, APHP Villejuif, France. Université Paris-Saclay, Univ. Paris-Sud, UVSQ, CESP, INSERM, Villejuif, France 2. CMAP, Ecole Polytechnique, 91128 Palaiseau Cedex, France , psychiatry and addictology department<br/> Brousse, Georges; CHU Clermont Ferrand, psychiatry and addictology group, jeu; chu nantes<br/> Challet-Bouju, Gaëlle; University Hospital of Nantes, addictology<br/> Grall-Bronnec, Marie; University Hospital of Nantes, addictology and psychiatry department</p> |
| <b>Primary Subject Heading</b>: | Mental health                                                                                                                                                                                                                                                                                                                                                                                                                                                                                                                                                                                                                                                                                                                                                                                                                                                                                                                                                                                                                                                                                                                                                                                                                                           |
| Secondary Subject Heading:      | Addiction                                                                                                                                                                                                                                                                                                                                                                                                                                                                                                                                                                                                                                                                                                                                                                                                                                                                                                                                                                                                                                                                                                                                                                                                                                               |
| Keywords:                       | gambling disorder, long term course, gamblers, addictive behaviors, addiction                                                                                                                                                                                                                                                                                                                                                                                                                                                                                                                                                                                                                                                                                                                                                                                                                                                                                                                                                                                                                                                                                                                                                                           |
|                                 |                                                                                                                                                                                                                                                                                                                                                                                                                                                                                                                                                                                                                                                                                                                                                                                                                                                                                                                                                                                                                                                                                                                                                                                                                                                         |

SCHOLARONE™  
Manuscripts

1  
2  
3 **Title: Problem and non-problem gamblers: A cross-sectional clustering study by gambling**  
4 **characteristics**

5  
6 **Running head: Gambling clustering in problem and non-problem gamblers**

7  
8 **Authors list:**

9  
10 Morgane Guillou-Landreat<sup>a,b</sup>, Isabelle Chereau-Boudet<sup>c</sup>, Bastien Perrot<sup>d</sup>, Lucia Romo<sup>e,f</sup> #, Irène  
11 Codina<sup>g</sup>, David Magalon<sup>h</sup>, Mélina Fatseas<sup>i</sup>, Amandine Luquiens<sup>j</sup>, Georges Brousse<sup>c</sup>, JEU-Group, Gaëlle  
12 Challet-Bouju<sup>d,k</sup>, Marie Grall-Bronnec<sup>d,k</sup> \*

13  
14  
15  
16 Members of the JEU Group:

17  
18 *Marie Grall-Bronnec, Gaëlle Challet-Bouju, Jean-Luc Vénisse, Lucia Romo, Cindy Legauffre, Caroline*  
19 *Dubertret, Irène Codina, Marc Valleur, Marc Auriacombe, Mélina Fatséas, Jean-Marc Alexandre,*  
20 *Pierre-Michel Llorca, Isabelle Chéreau-Boudet, Christophe Lançon, David Magalon, Michel Reynaud,*  
21 *and Amandine Luquiens.*  
22  
23  
24  
25  
26  
27

28 **Authors' Institutional Affiliations:**

29  
30 **a.** CHU Brest, Department of Addictive Disorders, Brest, France

31 **b.** Université de Bretagne Occidentale, Addictive Disorders Department ERCR SPURBO, Brest, France

32 **c.** CHU Clermont-Ferrand, Addictology and Psychiatry Department, Clermont-Ferrand, France

33  
34  
35 **d.** Université Nantes, Université Tours, UMR 1246 SPHERE 'methodS for Patients-centered outcomes  
36 and HEalth Research', Nantes, France

37  
38 **e.** EA 4430 CLIPSYD « CLInique PSYchanalyse Développement », University of Paris Ouest Nanterre La  
39 Défense, France

40  
41 **f.** Louis Mourier Hospital of Colombes, Assistance Publique—Hôpitaux de Paris (APHP), France

42  
43 **# Present address:** Psychotherapies Unit, Sainte-Anne Hospital—Psychiatry and Neurosciences, Paris,  
44 France

45  
46 **g.** Marmottan Medical Centre, GPS Perray-Vaucluse, Paris, France

47  
48 **h.** Department of Adult Psychiatry, Sainte-Marguerite University Hospital of Marseilles, France

49  
50 **i.** Psychiatry Laboratory, Sanpsy CNRS USR 3413, University of Bordeaux and Charles Perrens  
51 Hospital, Bordeaux, France

52  
53 **j.** Psychiatry and Addictology Department, Paul Brousse University Hospital of Villejuif, Assistance  
54 Publique—Hôpitaux de Paris (APHP), France

55  
56 **k.** CHU Nantes, Addictology and Psychiatry Department, Nantes, France

57  
58  
59 **\* Corresponding author:**  
60



1  
2  
3 Marie Grall-Bronnec

4 Addictology and Psychiatry Department

5 Hôpital Saint Jacques - 85, rue Saint Jacques - 44093 Nantes cedex 1

6  
7  
8 Tel: 33 (0)2 40 84 61 16

9 Fax: 33 (0)2 40 84 61 18

10  
11 **CORRESPONDING AUTHOR'S EMAIL ADDRESS: marie.bronnec@chu-nantes.fr**

12  
13  
14  
15 **Word count (excluding abstract, references, tables, and figure):**

16  
17 **Declarations of competing interest:**

18  
19  
20 MGB and GCB declare that the University Hospital of Nantes has received funding from the gambling  
21 industry (FDJ and PMU) in the form of a sponsorship that supports the gambling section of the  
22 BALANCED Unit (Reference Centre for Excessive Gambling). Scientific independence towards  
23 gambling industry operators is warranted. There were no constraints on publishing.

24 LR declares that the University of Paris Ouest Nanterre La Défense has received funding directly from  
25 gambling industry (FDJ and PMU) as part of other research contracts – this funding has never had any  
26 influence on the present work.

27 All the other authors declare that they have no conflicts of interest.  
28  
29  
30  
31

32  
33  
34  
35 **Clinical Trial Registration: NCT01207674 (ClinicalTrials.gov)**

36  
37 **Statement 1: Role of funding sources**

38  
39 The JEU cohort study was supported by joint support of the French Inter-Departmental Mission for  
40 the Fight against Drugs and Drug Addiction (MILDT) and the French National Institute of Health and  
41 Medical Research (INSERM), as part of the call for research projects launched by these two  
42 organisations in 2007 [MIL08010], and a grant from the French Ministry of Health [PHRC 2009 – RCB  
43 2008-A01188-47]. They had no role in the study design, collection, analysis, or interpretation of the  
44 data, writing of the manuscript, or decision to submit the paper for publication.

45  
46  
47  
48 The research presented here was conducted at the initiative of and coordinated by the Addictology  
49 and Psychiatry Department of Nantes University Hospital. Nantes University Hospital is the sponsor  
50 of this study. There were no constraints on publishing.  
51  
52  
53  
54

55  
56 **Statement 2: Authors' contributions:**

57  
58  
59 MGB and GCB designed the JEU cohort study, conducted the literature search, and wrote the  
60

1  
2  
3 protocol. MGB and GCB were responsible for project management. BP provided methodological  
4 advice, designed the statistical analysis plan, and conducted the statistical analysis for this research.  
5 All authors (including those mentioned in the JEU Group) contributed to the recruitment and  
6 inclusion of the participants in the JEU cohort study and to the development of the protocol,  
7 especially to the selection of the assessment content. MGL, MGB, and GCB wrote the manuscript. All  
8 authors read and approved the final manuscript.  
9  
10  
11  
12  
13  
14  
15  
16

#### **Statement 4: Acknowledgements**

17 We wish to sincerely thank all the staff who contributed to this study (the JEU Group), for their  
18 valuable assistance and significant investment. Special thanks go to those who collected the data.  
19 The members of the JEU Group are: Marie Grall-Bronnec, Gaëlle Challet-Bouju, Jean-Luc Vénisse,  
20 Lucia Romo, Cindy Legauffre, Caroline Dubertret, Irène Codina, Marc Valleur, Marc Auriacombe,  
21 Méлина Fatséas, Jean-Marc Alexandre, Pierre-Michel Llorca, Isabelle Chéreau-Boudet, Christophe  
22 Lançon, David Magalon, Michel Reynaud, and Amandine Luquiens. This research was conducted at  
23 the initiative of and coordinated by the Addictology and Psychiatry Department of the University  
24 Hospital of Nantes, who sponsored this study.  
25  
26  
27  
28  
29  
30  
31  
32

#### **Statement 5 : Data availability**

33 **No additional data available**  
34  
35  
36  
37

## **ABSTRACT**

### **Objectives**

38 Gambling characteristics are factors that could influence problem gambling development. The aim of  
39 this study was to identify a typology of gamblers to frame risky behaviour based on gambling  
40 characteristics (age of initiation/ of problem gambling, type of gambling: pure chance/chance with  
41 pseudoskills/chance with elements of skill, gambling online/offline, amount wagered monthly) and to  
42 investigate clinical factors associated with these different profiles in a large representative sample of  
43 gamblers.  
44  
45  
46  
47  
48  
49  
50

### **Design and setting**

51 The study is a cross-sectional analysis to the baseline data of the french JEU cohort study (study  
52 protocol : Challet-Bouju et al., 2014). Recruitment (April 2009 - September 2011) involved clinicians  
53 and researchers from seven institutions that offer care for or conduct research on PG. Participants  
54 were recruited in gambling places, and in care centres. Only participants who reported gambling in  
55 the previous year between 18 and 65 years old were included.  
56  
57  
58  
59  
60

1  
2  
3 Participants gave their written informed consent, it was approved by the French Research Ethics  
4  
5 Committee.

### 6 **Participants**

7  
8 The participants were 628 gamblers : 256 non-problem gamblers (NPG), 169 problem gamblers  
9 without treatment (PGWT), and 203 problem gamblers seeking treatment (PGST).

### 10 **Results**

11  
12 Six clustering models were tested, the one with three clusters displayed a lower classification error  
13 rate (7.92%) and was better suited to clinical interpretation : 'Early Onset and Short Course' (47.5%),  
14 'Early Onset and Long Course' (35%), and 'Late Onset and Short Course' (17.5%). Gambling  
15 characteristics differed significantly between the three clusters.  
16  
17  
18

### 19 **Conclusions**

20  
21 We defined clusters through the analysis of gambling variables , easy to identify, by psychiatrists or  
22 by physicians in primary care. Simple screening concerning these gambling characteristics could be  
23 constructed to prevent and to help PG identification. It is important to consider gambling  
24 characteristics : policy measures targeting gambling characteristics may reduce the risk of PG or  
25 minimise harm from gambling.  
26  
27  
28  
29

### 30 **Key words**

31  
32 **Gambling disorder, long term course, addictive behaviours, addiction**

33  
34 **Clinical Trial Registration:** NCT01207674 (ClinicalTrials.gov)

### 35 **Strengths and limitations of this study**

- 36  
37  
38  
39 - The sample size of gamblers ( $N = 628$ ) has rarely been achieved for studies with semi-structured  
40 interviews.  
41  
42 -The mixed sample of NPGs and PGs who have or have not sought treatment is one of the main  
43 strengths of our study, with inclusion directly from gambling locations.  
44  
45 - Recruitment of patients was performed at the moment of the legalisation of online gambling in  
46 France, which limits generalisation, as online gambling has since become widely available.  
47  
48 - Risk factors are self-reported at baseline evaluation. In future studies, these results should be  
49 compared to longitudinal data.  
50  
51  
52  
53  
54  
55  
56  
57  
58  
59  
60

## 1. INTRODUCTION

Gambling is a widespread social activity worldwide. Almost all national surveys conclude that there are more gamblers than non-gamblers [1]. For example, 74% of the general population in France had gambled in their lifetime [2]. The gambling industry has developed many types of gambling on different media, especially on the Internet. This expansion of legalised gambling has been identified as a public health concern [3-5]. Participation in gambling increases with gambling deregulation, prolific advertising, and the growing availability of gambling [6, 7].

Social gambling may become a gambling disorder (GD) in a minority of cases [7, 8]. GD is defined as a persistent, maladaptive pattern of gambling resulting in clinically significant impairment or distress, according to the Fifth Edition of the *Diagnostic and Statistical Manual of Mental Disorders* [9]. Around the world, between 0.2% and 2.1% of the population develops a GD [10], but a larger proportion experiences 'problem gambling', meaning having difficulties with gambling, but not as severe as those classified as GD [10]. Throughout this paper, 'problem gamblers' or 'problem gambling' will refer to a heterogeneous group of persons or conditions encompassing GD and its subthreshold symptoms. The lifetime prevalence of problem gambling across the world ranges from 0.7% to 6.5% [1]. In France, the last national survey estimated that 2.7% of the population could be considered problem gamblers [2].

The status of the problem gambler is unstable over time [11], and gamblers can have very different types of problem gambling development. Different factors—individual, environmental, or those linked to gambling behaviour characteristics—may influence gambling status and the development of problem gambling [1].

Most of the studies of problem gambling risk factors have focused on individual or environmental factors. Problem gambling is more likely to occur among men [1, 2, 11, 12], individuals with psychiatric disorders (anxiety, depression, and Attention Deficit/Hyperactivity Disorder [ADHD]) [11], or individuals of extreme old or young age [13-16]. Environmental factors such as level of income, socio-economic integration, or social support have an influence both on problem gambling prevalence worldwide and on individual gambling development and transitions between social gambling and problem gambling [1, 8, 11]. Different clusters of problem gamblers emerged through the analysis of these clinical variables [17-21]. Blaszczynski and Nower defined a theoretical pathway model of problem gambling [17]. They identified three clusters of problem gamblers (conditioned gamblers, emotionally vulnerable gamblers, and antisocial impulsivist gamblers) based mainly on clinical experience with problem gamblers and through analysis of psychopathological variables. They assumed that certain clinical variables, such as psychiatric comorbidities or impulsivity, could influence the development of problem gambling. Several empirical studies of this pathways model

1  
2  
3 and other subtyping approaches confirmed clinical differences between problem gamblers' profiles,  
4 even though no study has conclusively supported this clinical classification and the underlying  
5 prognosis hypotheses [18-21]. In all these studies, clustering was made through analysis of  
6 psychopathological variables measured with psychometrics tools and did not include gambling  
7 characteristics.  
8  
9

10  
11 Only a few studies have analysed gambling characteristics and their influence on gambling status  
12 (social gambling or problem gambling) and problem gambling development [7, 12, 21-26]. Gambling  
13 characteristics include many variables: age of initiation, medium or type of gambling, gambling  
14 history, wagering amounts, frequency of gambling, gambling status (problem or non-problem  
15 gamblers), etc. An early age of initiation is a high risk factor for the development of problem  
16 gambling later in life and is associated with a higher level of problem gambling severity [21-23].  
17 Online gambling contributes to and enhances the risk of problem gambling development [6, 12],  
18 even if most online gamblers also gamble in offline forms [12, 24]. When considering preferred  
19 gambling activity, gamblers who preferentially play the same type of games share a common profile  
20 independent of the pathological characteristics [25]. Hing *et al.* compared the profiles of online  
21 gamblers according to their preferred type of gambling (electronic gaming machine (EGM), horse  
22 racing, or sport betting); they showed that online bettors were younger men, with more frequent  
23 substance use [7].  
24  
25

26 All these previous studies were, in a large majority of cases, undertaken within the problem gambling  
27 population [19-21, 27-29]. They analysed one specific gambling characteristic or defined clustering  
28 according to psychological variables and psychometric or cognitive assessment tests [19, 27, 29-31].  
29 Combined with individual at-risk factors as psychopathological variables, clinicians should be aware  
30 of gambling characteristics.  
31  
32

33 We hypothesised that gambling structural characteristics influenced gamblers' profiles and problem  
34 gambling development, that clustering through gambling characteristics would help to identify  
35 different types of problem gamblers, and that this classification would be clinically pertinent.  
36  
37

38 We did not find any studies in the literature which involved a broad sample of gamblers, included  
39 non-problem and problem gamblers, and specifically concerned gambling characteristics.  
40  
41

42 Our objective was to identify a typology of gamblers based on clinical and gambling characteristics,  
43 and to investigate factors associated with these different profiles in a large representative sample of  
44 gamblers.  
45  
46

47 The findings can help all clinicians, even non-specialists, to be aware of and identify problem  
48 gamblers through the evaluation of gambling characteristics. It may also improve gamblers  
49 interventions tailored to the specific gambling characteristics.  
50  
51  
52  
53  
54  
55  
56  
57  
58  
59  
60

## 2. MATERIAL AND METHODS

### 2.1. Participants

The participants were 628 gamblers who took part in the JEU cohort study. The sample included 256 non-problem gamblers (NPG), 169 problem gamblers without treatment (PGWT), and 203 problem gamblers seeking treatment (PGST). The JEU cohort study is a 5-year longitudinal national case-control cohort in France that seeks to identify protective and risk factors in gambling practice (for more information, please refer to the study protocol of the JEU cohort: Challet-Bouju et al., 2014 [32]). The present study applied a cross sectional analysis to the baseline data of the JEU cohort.

Recruitment occurred between April 2009 and September 2011 and involved a group of French clinicians and researchers from seven institutions that offer care for or conduct research on problem gambling.

The sample was constituted based on an approximate equality of size between problem and non-problem gamblers because of the low prevalence of gambling problems in the general population. Participants were recruited in different gambling places (casinos, cafés, smoke shops, etc.) and via the press in order to cover the broadest possible range of gambling activities. In gambling places, all the gamblers were solicited outside of gambling time, because gamblers are particularly irritable when gambling and in order to avoid disturbing the gambling venue activity. We have no information about non-responders as a consequence of the arrangements with the gambling places which agreed to help us, whereby we sought no information from gamblers who refused to participate in the first instance. Problem gamblers were also recruited in seven care centres, where they had started treatment less than 6 months before. Only participants who reported gambling on at least one occasion in the previous year and who were between 18 and 65 years old were included in the study. Participants were given a compensation of €15, except for problem gamblers from care centres with whom the interview would have been held for care purposes anyway.

Inclusion and exclusion criteria are presented in Table 1.

| Inclusion criteria                                                               | Exclusion criteria                          |
|----------------------------------------------------------------------------------|---------------------------------------------|
| Participants who reported gambling on at least one occasion in the previous year | No gambling in the past year                |
| Between 18 and 65 years old                                                      | Under 18 or over 65 years old               |
| Understanding of French language                                                 | Cognitive impairment                        |
| Written consent                                                                  | Inability to understand the French language |
|                                                                                  | No consent                                  |

Table 1. Inclusion and exclusion criteria

### 2.2. Ethical approval

1  
2  
3 Participants were informed about the research and gave their written informed consent prior to their  
4 inclusion in the study. This study was approved by the French Research Ethics Committee (CPP) on  
5 January 8, 2009. The approval granted from the CPP applies to all sites at which the study occurred.  
6  
7

### 8 9 **Patient and public involvement**

10  
11 No patients nor the public were involved in the development of the research question. No patient  
12 advisers were included in the research project.  
13  
14

### 15 16 **2.3. Assessment**

17  
18 The baseline assessment was performed just after inclusion in the study. The assessment combines a  
19 clinical structured interview carried out with a trained researcher or psychologist with a set of  
20 standardised self-report questionnaires. Participants completed the baseline interview in the  
21 research centre or the gambling place in which they were recruited.  
22  
23  
24

#### 25 26 **2.3.1. Sociodemographic characteristics**

27  
28 We collected information about age, gender, marital status, income, and work status.  
29

#### 30 31 **2.3.2. Gambling characteristics**

##### 32 **Pathological gambling section in the DSM-IV TR (APA 1994)**

33  
34 We used a clinical interview based on the 10 diagnostic criteria for pathological gambling according  
35 to the DSM-IV TR (APA, 2000). The gambling disorder section of the DSM-5 could not have been used  
36 because the recruitment was conducted in 2009–2011. Gamblers who met at least three DSM-IV  
37 criteria were classified as problem gamblers, including both gamblers “at risk” of pathological  
38 gambling and gamblers with a diagnosis of pathological gambling. We used a non-standard threshold  
39 of three instead of five so as to include subclinical forms of problem gambling. Previous literature has  
40 supported the relevance of this categorisation [33-35]. The number of positive DSM-IV criteria for  
41 problem gambling was also used as a dimensional score of PG severity.  
42  
43  
44  
45  
46

##### 47 **Problem gambling development and characteristics**

48  
49 We constructed a questionnaire to collect information concerning the course and characteristics of  
50 their gambling. The development of the gambling was approached by investigating the history of  
51 their gambling. The development of the gambling was approached by investigating the history of  
52 their gambling practice: age at initiation and of first gambling-related problems, duration of gambling  
53 history (from age at initiation to current age), and age at the time of the diagnosis of comorbid  
54 psychiatric disorders (if relevant). We collected information about the familial and social support  
55 attitudes towards the problem gambler’s difficulties. The individual’s experimentation with a  
56  
57  
58  
59  
60

gambling-free period of at least one month's duration since his/her initiation was also investigated.

We collected information on participation in and frequency of various forms of gambling over the past year. This included the mean average amount of money wagered monthly in gambling and the maximum wager placed in a single day. With regard to gambling preferences, we investigated the preferred type of gambling and medium for gambling, presented in Table 2. Gamblers identified their preferred gambling activity among all those they had experienced and we classified the preferred type of gambling according to the three categories proposed by Boutin in 2010: pure chance games (lotteries, slot machines, scratch cards, video lottery terminals, etc.), bank games with an element of skill (sports betting, horserace betting, blackjack), or social games with skill (mainly Texas Hold'em and Omaha variants of poker) [36]. We also asked them to specify if they preferred gambling on the Internet or offline.

|                    |                                                                                                                                                                                                      |
|--------------------|------------------------------------------------------------------------------------------------------------------------------------------------------------------------------------------------------|
| Type of gambling   | Pure chance games (video lottery terminals, scratch games, lotteries)<br><br>Chance games with pseudoskills (sport and horse betting, blackjack)<br><br>Chances games with element of skills (poker) |
| Medium of gambling | Online: gambling on the Internet<br><br>Offline: smoke shop, café, casino, etc.                                                                                                                      |
| Gambling status    | Non-problem gambler (NPG)<br><br>Problem gambler seeking treatment (PGST)<br><br>Problem gambler without treatment (PGWT)                                                                            |

**Table 2. Types and media of gambling and gambling status**

### **2.3.3. Psychiatric comorbidities**

#### **Mini International Neuropsychiatric Interview (MINI)**



1  
2  
3 The MINI is a structured diagnostic interview that is compatible with the International Statistical  
4 Classification of Diseases and Related Health Problems, Tenth Revision (ICD-10), and the Diagnostic  
5 and *Statistical Manual of Mental Disorders*, Fourth Edition (DSM-IV) [37].  
6

7  
8 It explores the lifetime and current main Axis I disorders (mood and anxiety disorders, psychotic  
9 syndrome, alcohol and substance use disorders).  
10  
11

### 12 13 ***Wender-Utah Rating Scale-Child (WURS-C)***

14  
15 This self-report questionnaire has been validated for the retrospective evaluation of childhood ADHD  
16 in adults. Its specificity (89.1%) is good. It is designed to assess ADHD symptoms represented by 25  
17 items on a 5-point Likert scale. A score greater than or equal to 46/100 would indicate that diagnosis  
18 [38, 39].  
19  
20  
21

### 22 23 **2.3.4. Personality**

#### 24 25 ***A 125-item version of the Temperament and Character Inventory (TCI-125)***

26  
27 The TCI-125 is used to rapidly explore the four dimensions of temperament and the three dimensions  
28 of character in personality as defined by Cloninger's psychobiological model [40]. It measures seven  
29 dimensions through four temperaments and three characters [41, 42]. The dimensions related to  
30 temperament (genetic and stable tendencies of personality) and the dimensions related to character  
31 (acquired under the influence of apprenticeship, experience, and environment) were assessed.  
32  
33  
34  
35  
36  
37

### 38 39 **2.4. Statistical analysis**

40  
41 A descriptive analysis of the sociodemographic, clinical, and gambling characteristics was carried out  
42 in order to obtain means, medians, and standard deviations of continuous variables, as well as the  
43 number of people and the percentages of categorical variables.  
44  
45

46  
47 To identify a typology of gamblers based on the course of their gambling and their preferences, we  
48 led an exploratory analysis. We performed a clustering of gamblers with eight variables: age at  
49 initiation, age at onset of gambling problem, duration of gambling history, age at diagnosis of  
50 comorbid psychiatric disorder, history of a gambling-free period of at least one month's duration,  
51 familial and social support, and preferred type of gambling and medium for gambling. We used the  
52 Latent Gold software [43, 44] to perform a latent class clustering (LCC) of the gamblers. LCC is a  
53 person-centred approach that seeks to identify homogenous subgroups, each group being defined by  
54 a specific probability distribution. LCC has been found to be more likely to give superior classification  
55 results than more traditional methods such as *k*-means or hierarchical clustering [45], particularly  
56  
57  
58  
59  
60

because it requires fewer assumptions. Moreover, LCC can handle mixed-mode data (i.e., both categorical and continuous variables) without transformation of variables. We ran models that comprised 1 to 6 clusters. Missing data were supposed missing at random because these missing data were considered independent of the values of the variable but dependent on another variable (e.g., missing values for age at onset of gambling problems were independent of the variable of age at onset of gambling problems, and depended instead on whether or not the participant had ever had gambling problems at all). Missing data were handled with full information maximum likelihood (FIML) estimation. FIML consists of estimating a likelihood function for each individual based on the data that are not missing so that all the available data are used. The Bayesian information criterion (BIC) (a lower BIC indicating a better model) and the classification error rate (which represents the precision of individuals' classification) were used to select the best model. Statistical differences between clusters were assessed by Wald tests. Variables that do not influence the estimation of the model were included as covariates to describe and compare the clusters. For these inactive covariates, a three-step approach was used to test differences between clusters. This method provides an unbiased estimation of the association between cluster-membership probabilities and external covariates by maximizing a weighted log-likelihood function for clustered data. [46]

### 3. RESULTS

#### 3.1. Descriptive analysis

The sample comprised 256 NPGs, 169 PGWTs, and 203 PGSTs. The sociodemographic data of the whole sample ( $N = 628$ ) are detailed in Table 3. Participants were mainly men ( $N = 418$ , 66.6%), and the mean age was 43.4 years ( $SD = 12.9$ ). Most participants were employed, with a regular income higher than €1,100 (i.e., approximately 1,400 USD).

|                              | <i>N</i> | %    |
|------------------------------|----------|------|
| <b>Gender</b>                |          |      |
| Male                         | 418      | 66.6 |
| Female                       | 210      | 33.4 |
| <b>Marital status</b>        |          |      |
| Single                       | 313      | 49.9 |
| In a relationship            | 314      | 50.1 |
| <b>Educational level</b>     |          |      |
| Below high school graduation | 306      | 48.9 |

|                                                                                      |                 |                  |
|--------------------------------------------------------------------------------------|-----------------|------------------|
| Higher than or equal to high school graduation                                       | 320             | 51 .1            |
| <b>Professional activity</b>                                                         |                 |                  |
| Working                                                                              | 398             | 63.5             |
| Not working                                                                          | 229             | 36.5             |
| <b>Level of income</b>                                                               |                 |                  |
| Regular and higher than the French minimum wage<br>(approximately €1100 or 1400 USD) | 440             | 70.1             |
| Others                                                                               | 188             | 29.9             |
|                                                                                      | <b><i>M</i></b> | <b><i>SD</i></b> |
| <b>Age</b>                                                                           | 43.4            | 12.9             |

**Table 3. Descriptive analysis of sociodemographic variables for the whole sample**

### 3.2. Clustering

Gambling characteristics were used for clustering : age at gambling initiation, age at problem gambling onset, duration of gambling history , age at diagnosis of first psychiatric comorbidities (if relevant, History of gambling-free period of at least one month, Familial and social support related to gambling problems, preferred type of gambling, preferred medium of gambling) , Among the six models tested, two were very similar in terms of the BIC indicator: a model with three clusters (BIC = 18253.8) and another with four clusters (BIC = 18252.6). Of these two models, the one with three clusters displayed a lower classification error rate (7.92% vs 13.80% for the four-cluster solution) and was better suited to clinical interpretation. We thus chose the three-cluster partition.

Clinical, socio-professional, psychological variables, and gambling characteristics of the three clusters are presented in Table 4.

|                                                                                    | Cluster 1<br>EOSC | Cluster 2<br>EOLC | Cluster 3<br>LOSC | P-value,<br>Wald test                            |
|------------------------------------------------------------------------------------|-------------------|-------------------|-------------------|--------------------------------------------------|
| <b>Cluster size %, N</b>                                                           | 47.5 (298)        | 35.0 (220)        | 17.5 (110)        |                                                  |
| <b><u>VARIABLES INCLUDED IN THE CLUSTERING ANALYSIS</u></b>                        |                   |                   |                   |                                                  |
| <b>Age at gambling initiation (yrs)</b>                                            | 16.4              | 17.9              | 36.1              | < 0.001 <sup>a,b,c</sup>                         |
| <b>Age at onset of problem gambling (yrs)</b>                                      | 26.5              | 41.3              | 45.1              | < 0.001 <sup>a,b,c</sup>                         |
| <b>Duration of gambling history (yrs)</b>                                          | 16.2              | 35.4              | 16.2              | < 0.001 <sup>a,c</sup>                           |
| <b>Age at diagnosis of the first psychiatric comorbidities (if relevant) (yrs)</b> | 15.3              | 23.7              | 26.5              | < 0.001 <sup>a,b</sup>                           |
| <b>History of gambling-free period of at least one month (%)</b>                   | 71.0              | 53.6              | 58.3              | 0.001 <sup>a,c</sup>                             |
| <b>Familial and social support related to gambling problems (%)</b>                | 92.6              | 84.3              | 92.5              | 0.018 <sup>a</sup>                               |
| <b>Preferred type of gambling</b>                                                  |                   |                   |                   |                                                  |
| Pure chance games (lotteries, slots, scratch cards, video lottery terminals, etc.) | 48.2              | 58.2              | 79.8              | < 0.001 <sup>a,b,c</sup>                         |
| Bank games with an element of skill (sports betting, horserace betting, blackjack) | 30.8              | 36.1              | 16.9              |                                                  |
| Social games with skill (Texas Hold'em and Omaha variants of poker)                | 21.0              | 5.7               | 3.4               |                                                  |
| <b>Preferred gambling medium (on the Internet)</b>                                 | 20.0              | 8.1               | 2.3               | < 0.001 <sup>a,b</sup><br>< 0.001 <sup>a,b</sup> |
| <b><u>CO-VARIABLES (Not included in clustering)</u></b>                            |                   |                   |                   |                                                  |
| <b><u>Sociodemographic characteristics</u></b>                                     |                   |                   |                   |                                                  |

|                                                       |       |       |       |                          |
|-------------------------------------------------------|-------|-------|-------|--------------------------|
| <b>Gender (%)</b>                                     |       |       |       |                          |
| Women                                                 | 23.5  | 32.4  | 62.5  | < 0.001 <sup>a,b,c</sup> |
| Men                                                   | 76.5  | 67.6  | 37.5  |                          |
| <b>Age (yrs)</b>                                      | 32.7  | 53.4  | 52.3  | < 0.001 <sup>a,b</sup>   |
| <b>Level of income ≥ €1100 (1400 USD) (%)</b>         | 67.2  | 72.8  | 72.4  | 0.250                    |
| <b>Marital status (single) (%)</b>                    | 55.4  | 38.7  | 57.0  | < 0.001 <sup>a,c</sup>   |
| <b>Employment status (active) (%)</b>                 | 73.0  | 56.0  | 52.0  | < 0.001 <sup>a,b</sup>   |
| <b><u>Gambling severity</u></b>                       |       |       |       |                          |
| <b>Gambling status (%)</b>                            |       |       |       |                          |
| Non-problem gamblers (NPG)                            | 48.1  | 51.6  | 55.7  | 0.020 <sup>a,c</sup>     |
| Problem gamblers without treatment (PGWT)             | 16.8  | 23.0  | 21.3  |                          |
| Problem gamblers seeking treatment (PGST)             | 35.2  | 25.4  | 23.0  |                          |
|                                                       |       |       |       | 0.200                    |
| <b>Number of DSM-IV criteria (mean)</b>               | 3.8   | 3.7   | 3.3   | 0.200                    |
| <b><u>Gambling habits:</u></b>                        |       |       |       |                          |
| <b>Amount wagered monthly in gambling (in euros)</b>  | 592.4 | 632.5 | 512.3 | 0.560                    |
| <b>Gambling frequency over the past 12 months (%)</b> |       |       |       | 0.067 <sup>c</sup>       |
| Less than once a month                                | 8.2   | 6.9   | 8.6   |                          |
| More than once a month                                | 17.6  | 12.9  | 19.2  |                          |
| Once a week                                           | 13.2  | 14.6  | 20.6  |                          |
| More than once a week                                 | 61.0  | 65.7  | 51.6  |                          |
| <b><u>Comorbid psychiatric disorders</u></b>          |       |       |       |                          |
| <b>Mood disorders (%)</b>                             | 46.1  | 45.5  | 56.0  | 0.110                    |
| Depressive episode (%)                                | 40.2  | 41.7  | 48.6  | 0.260                    |
| Hypomanic or manic episode (%)                        | 13.6  | 9.2   | 12.9  | 0.240                    |
| <b>Anxiety disorders (%)</b>                          | 38.2  | 36.4  | 40.0  | 0.780                    |

|                                              |      |      |      |                          |
|----------------------------------------------|------|------|------|--------------------------|
| Panic disorder (with or without agoraphobia) | 18.4 | 21.4 | 25.4 | 0.220                    |
| Social phobia                                | 11.7 | 8.4  | 15.9 | 0.082                    |
| Obsessive Compulsive disorder                | 3.8  | 2.5  | 1.0  | 0.360                    |
| Generalised Anxiety Disorder                 | 17.4 | 12.0 | 11.7 | 0.08                     |
| Post-Traumatic Stress Disorder               | 7.2  | 6.3  | 9.7  | 0.490                    |
| <b>Addictive disorders (%)</b>               | 42.7 | 32.8 | 19.8 | < 0.001 <sup>a,b,c</sup> |
| Alcohol Use Disorder                         | 28.7 | 27.0 | 13.7 | 0.007                    |
| Substance Use Disorder                       | 25.5 | 10.1 | 6.1  | < 0.001                  |
| <b>Antisocial personality disorder (%)</b>   | 5.5  | 3.3  | 1.1  | 0.220                    |
| <b>Current suicide risk (%)</b>              | 19.4 | 26.7 | 29.5 | 0.027 <sup>a,b</sup>     |
| <b>Lifetime suicide attempts (%)</b>         | 11.4 | 18.2 | 15.4 | 0.055 <sup>a</sup>       |
| <b>ADHD</b>                                  |      |      |      |                          |
| WURS score (M)                               | 31.7 | 28.7 | 28.3 | 0.096 <sup>a</sup>       |
| <b><u>Personality</u></b>                    |      |      |      |                          |
|                                              | 54.9 |      |      |                          |
| <b>TCI scores (M)</b>                        |      |      |      |                          |
| Novelty Seeking (NS)                         | 54.9 | 51.5 | 48.6 | 0.001 <sup>a,b</sup>     |
| Harm Avoidance (HA)                          | 43.7 | 44.7 | 42.8 | 0.730                    |
| Determination (D)                            | 67.8 | 67.0 | 68.7 | 0.720                    |
| Cooperation (C)                              | 73.6 | 73.5 | 75.6 | 0.450                    |
| Reward Dependence (RD)                       | 60.8 | 59.1 | 60.7 | 0.460                    |
| Transcendence (T)                            | 27.7 | 33.8 | 36.7 | < 0.001 <sup>a,b</sup>   |
| Persistence (P)                              | 52.8 | 55.9 | 59.2 | 0.069 <sup>b</sup>       |

**Table 4. Profiles of the three clusters identified**

**Note:**

<sup>a</sup> significant test (p<0.05) for the comparison between cluster 1 and cluster 2

<sup>b</sup> significant test (p<0.05) for the comparison between cluster 1 and cluster 3

<sup>c</sup>significant test ( $p < 0.05$ ) for the comparison between cluster 2 and cluster 3

We identified three clusters with significant differences among the courses of gambling. Figure 1 represents the **three clusters** and the **significant variables and covariables**.

#### *The Early Onset and Short Course (EOSC) cluster (47.5%)*

This group was predominantly represented by young men (76.5% men, mean age 32.7). This group was more active than the others (73.0% were active), and more than half were single (55.4%). This cluster has the lowest onset age (16.4 years old) and the earliest beginning of problem gambling (26.5 years old). Problem gambling thus appeared approximately 10 years after gambling initiation. Moreover, psychiatric comorbidities appeared earlier in life (15.3 years). Nearly half of this cluster (46.1%) had a history of mood disorders, with the highest frequency of lifetime hypomanic or manic episodes (13.6%). This cluster had significantly the highest level of Novelty Seeking ( $M = 54.9$ ). Addictive comorbidities were also more prevalent in this group, with 28.7% and 25.5%, respectively, reporting an alcohol use disorder and a substance use disorder. This group was the only one with a majority of PG (52%) and had the highest proportion of PGST (35.2%). Seventy-one percent had already experienced at least one month without gambling, which was significantly higher than in other groups. For the two other clusters, the favourite type of gambling was predominantly pure chance games (48.2%). However, contrariwise, a majority of these gamblers identified strategic games (regrouping bank games with an element of skill and social games with skill) as their preferred gambling type (51.8%). Moreover, 20% preferred gambling on the Internet, a higher proportion than in the other clusters.

#### *The Early Onset and Long Course (EOLC) cluster (35.0%)*

This group was also predominantly constituted by men (67.6%), but was older than in the EOSC cluster ( $M = 53.4$  years old). The majority lived with a partner (61.3%), contrary to the two other clusters, even though they were those who reported the lowest frequency of familial support (84.3%). The mean gambling onset age was 17.9 years. Problem gambling in problem gamblers appeared 23.4 years after gambling initiation, and the mean duration of the gambling practice at the moment of the inclusion was 35.4 years, which was more than twice the length for the two other clusters. 45.5% presented mood disorders and 36.4% anxiety disorders. Alcohol use disorders were quite prevalent in this cluster (27.0%). Psychiatric comorbidities appeared late in life, with the mean age of the first diagnosis of psychiatric comorbidity being 23.7 years, much older than the mean age

of gambling initiation. They had the highest prevalence of suicidal attempts (18.2%) and a higher frequency of current suicidal risk than the EOSC cluster (26.7%). They had the lowest prevalence of gamblers having experienced a gambling cessation for at least one month (53.6%). The majority (51.6%) of this cluster was NPG, and the proportion of PGWT was the highest in this group (23.0%). This group had the highest proportion of bank games with an element of skill as the preferred gambling type (36.1%). Slightly less than 10% preferred Internet gambling.

#### *The Late Onset and Short Course (LOSC) cluster (17.5%)*

This group was the only one predominantly constituted by women (62.5%), with a mean age of 52.3 years old. However, the majority lived alone (57.0%), and this cluster had the lowest prevalence of active employment (52.0%). The mean age of gambling initiation was 36.1 years old, significantly older than the other two groups. However, the gambling course between the mean age of initiation and the mean age of problem gambling was the shortest among the whole sample: 9 years. Psychiatric comorbidities were more prevalent in this group; 56.0% had a history of mood disorders, especially a high prevalence of lifetime depressive disorder (48.6%). 29.5% reported a current suicidal risk, more than the two other groups. Psychiatric comorbidities appeared later in life. Indeed, the mean age of the first diagnosis of psychiatric comorbidity was 26.5 years old. The frequency of addictive disorders was the lowest in this group (19.8%). They displayed significantly the highest personality scores for transcendence ( $M = 36.7$ ). In this cluster, the frequency of NPG was the highest (55.7%), and the problem gamblers were equally either seeking treatment (23.0%) or not (21.3%). The preferred type of gambling was predominantly pure chance games for 79.8% of the cluster, and only 2.3% preferred Internet gambling.

#### **FIGURE 1.**

### **4. DISCUSSION**

#### **4.1. Main findings**

##### ***4.1.1. Three different profiles of gamblers***

Three distinct clinical profiles of gamblers were identified through the analysis of gambling characteristics. Differences in the course and characteristics of gambling corresponded to psychopathological profiles, and they were significant in terms of socio-demographic variables (gender, age, work, and marital status) and also in terms of gambling status and some comorbidities (addictive disorders, hypomanic episodes, and personality traits). We propose a classification of our clusters according to gambling characteristics: Early Onset and Short Course (EOSC) (Cluster 1), Early



1  
2  
3 Onset and Long Course (EOLC) (Cluster 2), and Late Onset and Short Course (Cluster 3). Regarding  
4 significant clinical and psychopathological covariables, this three-cluster model defined through the  
5 analysis of gambling characteristics is partly comparable to the theoretical pathways model of  
6 Blaszczynski and Nower [17], which was in turn defined through psychopathological variables.  
7  
8  
9

#### 10 *The Early Onset and Short Course cluster (Cluster 1-EOSC)*

11  
12  
13 The mean age at gambling initiation is under 18 years, which is the legal age for gambling in France.  
14 Lynch *et al.* found that young adults who had started gambling prior to the age of 18 were more  
15 likely to experience at least one symptom of GD than those who started gambling at the age of 18 or  
16 later [47]. Early initiation is described as a marker of risk of GD in later life: Kessler *et al.* (2008) found  
17 that the mean age at the onset of gambling was significantly lower among those who subsequently  
18 developed problem gambling than among those who did not [48, 49], and Jimenez *et al.* identified a  
19 younger age at the onset of gambling as associated with a greater severity of problem gambling. Our  
20 results agreed with this hypothesis: the EOSC group had a higher frequency of problem gambling and  
21 higher gambling severity than the two other groups. Nevertheless, age at initiation did not explain  
22 the course of gambling in itself: the two clusters associated with the earlier age at onset presented  
23 two different courses of gambling, either a short development (approximately 10 years) for the EOSC  
24 cluster or a long development (approximately 23 years) for the EOLC cluster.  
25  
26  
27  
28  
29  
30  
31  
32  
33

34 This cluster had a significantly higher preference for online gambling than the others. Gambling on  
35 the Internet is associated with a high availability of gambling opportunity, and online poker induces  
36 specific problems, leading problem gamblers to lose money but also to spend a large amount of time  
37 gambling [50]. Moreover, involvement in gambling and attraction to strategic games are risk factors  
38 for problem gambling [51]. Male Internet bettors face heightened risks of related gambling problems  
39 [52]. Mirroring the comments made above regarding EGM players, much may depend on the  
40 patterns of use exhibited by online sports bettors. For example, if online betting is done sporadically  
41 in a social context (e.g., watching a game together), then online play may represent no extra risk over  
42 venue-based play. On the other hand, if online sports betting facilitates different patterns of use  
43 (e.g., solitary betting in extended sessions late at night), then this would provide further evidence  
44 that the online product presents a greater risk. At the present time, concern appears to be justified,  
45 as young men in particular are increasingly seeking treatment for difficulties in controlling their  
46 online sports betting [53]  
47  
48  
49  
50  
51  
52  
53  
54  
55

56 Strategic games usually attract young males, with an earlier onset of the disorder [54]. They tend to  
57 engage in more than one specific type of problematic game and to take more risks, including betting  
58 large amounts of money [54]. This cluster included the highest frequency of PG and the highest  
59  
60

1  
2  
3 frequency of PGST, and they most frequently indicated the occurrence of gambling-free periods of  
4 one month, probably in an effort to regain control over gambling or in reaction to negative  
5 consequences.  
6  
7

8  
9 The EOSC cluster presented the highest level of ADHD symptomatology. One may suppose that  
10 psychopathological variables combined with age at onset may influence the course of gambling, as  
11 defined in the pathways model [17]. Impulsivity is also a key point of the antisocial impulsivist  
12 pathway, defined by Blaszczynski and Nower as being associated with gambling-related criminal  
13 behaviours and addictive comorbidities [17]. Novelty seeking was also high in our study, as reported  
14 in the literature, especially in social games with skill [54, 55]. This was associated with a high  
15 prevalence of psychiatric and addictive comorbidities, as previously described for PG with impulsivity  
16 and ADHD [17, 56, 57].  
17  
18  
19  
20  
21  
22

### 23 *EOLC cluster (Cluster 2)*

24  
25  
26 The EOLC cluster had a long course of gambling (35.4 years). They spent the highest amount of  
27 money on gambling, and only 53.6% had experienced a gambling cessation for at least one month.

28 We found important results concerning familial support: although EOLC gamblers lived  
29 predominantly with partners, they reported the lowest level of familial and social support related to  
30 gambling problems. We hypothesise that gambling had severe consequences on the family, as shown  
31 in the literature [58, 59], thus reducing familial support.  
32  
33  
34  
35

36 An important characteristic is the absence of any lifetime premorbid feature of psychopathology  
37 before the onset of the gambling problem. We may hypothesise that symptoms of anxiety or  
38 depression were the consequences of problem-gambling-related difficulties. However, at inclusion,  
39 they presented the highest prevalence of attempted suicide (and a current suicide risk in 26.7% of  
40 cases). One can assume suicide risk and attempted suicides to be consequences of problem-  
41 gambling-related difficulties [60]. The EOLC cluster could share similarities with the first pathway,  
42 defined by Blaszczynski and Nower as 'conditioned problem gamblers' (CG). This CG group is defined  
43 as gamblers without comorbidities who are preoccupied with gambling, engage in chasing, and  
44 fluctuate between excessive gambling and problem gambling.  
45  
46  
47  
48  
49  
50  
51  
52

### 53 *The LOSC cluster (Cluster 3)*

54  
55  
56 The LOSC gamblers predominantly preferred pure chance games. Different studies have shown that  
57 gamblers who preferred slot machines had higher levels of depression [25, 61].  
58

59 We can underline two notable points in our LOSC cluster. First, women made up the majority of the  
60

1  
2  
3 LOSC cluster (62.5%), and in this cluster the course of gambling was the shortest observed in our  
4 study. These results support the concept of a 'telescoping effect' in the course of problem gambling  
5 among women [62-64]. In the literature, this effect was indicated by female gamblers seeking  
6 treatment [65, 66] but was not confirmed in the general population [67]. In our study, we included a  
7 mixed population of gamblers (NPG, PGWT, and PGST), and our sample also consisted of gamblers  
8 who were somewhat older ( $M = 52$  years in the LOSC cluster) than in the Slustke sample [67].  
9

10  
11  
12  
13 Second, the LOSC gamblers had the highest mean age at gambling initiation but also the shortest  
14 gambling trajectory. As a consequence, we could conclude that the course of gambling and the risk of  
15 problem gambling were not systematically linked to an early age of onset, but perhaps to a  
16 combination of psychopathological variables, age at initiation, gender, and type of gambling, as  
17 hypothesised in some studies [20, 21].  
18  
19  
20

21  
22  
23 This cluster presented premorbid anxiety and/or depression: 56.0% had a lifetime history of mood  
24 disorder, with 29.5% experiencing a current suicide risk, which are the highest percentages of our  
25 sample. This cluster was also notable for the lowest frequency of seeking treatment. Suicide risk is  
26 one of the main dramatic consequences of gambling [60], and suicidal thoughts can lead to giving up  
27 gambling and accepting treatment. This course of gambling characteristic could support the  
28 hypothesis that participation in gambling is motivated by desire on the part of gamblers to modulate  
29 their emotional distress and their negative feelings [17]. The LOSC cluster might share similarities  
30 with the pathway of 'emotionally vulnerable problem gamblers' (EV) [17, 27, 28].  
31  
32  
33  
34  
35  
36  
37

#### 38 **4.2. Strengths and weaknesses of this study**

39  
40 This study has several limitations, especially the relatively restricted amount of data collected.  
41 Characteristics related to the course of gambling (age at initiation, age at onset of gambling  
42 problems, etc.) and lifetime psychiatric disorders were assessed in a retrospective manner and were  
43 self-reported, which could induce a recall bias. Moreover, we did not use DSM 5 criteria, and we did  
44 not analyse impulsivity and cognitive distortions in this population. Recruitment of patients occurred  
45 at the moment of the legalisation of online gambling in France (2010), which limits generalisation, as  
46 online gambling has since become widely available. However, the combination of NPGs and PGs who  
47 have and who have not sought treatment is one of the main strengths of our study. We also included  
48 gamblers recruited directly from gambling locations. This method gave us access to a broad spectrum  
49 of gambling activities. Finally, this sample size has rarely been achieved by studies with semi-  
50 structured interviews (studies with such high numbers of participants are generally based on  
51 telephone-based surveys).  
52  
53  
54  
55  
56  
57  
58  
59  
60

1  
2  
3 That study more accurately categorised profiles of gamblers and problem gamblers through gambling  
4 characteristics and course. It did not examine factors that increase the risk of transitioning from a  
5 non-problem gambler to a problem gambler, nor did it define vulnerability profiles associated with  
6 the emergence of problem gambling in a longitudinal study.  
7  
8  
9

#### 10 11 **4.3. Implications for clinicians and policymakers** 12

13  
14 It is important to consider gambling characteristics because preventive interventions or policy  
15 measures may reduce the risk of problem gambling or minimise harm from gambling [7]. We defined  
16 a clustering of gamblers through the analysis of variables which were easy to identify by psychiatrists  
17 or physicians in primary care: gambling characteristics, age at gambling initiation, type of gambling  
18 and gambling medium, duration of gambling activities, age at onset of psychiatric comorbidities, and  
19 history of gambling-free periods of at least one month's duration. We hypothesise that simple  
20 screening concerning these gambling characteristics could be constructed to prevent PG and to help  
21 PG identification.  
22  
23  
24  
25  
26  
27  
28

29 Prevention interventions should be tailored to these at-risk profiles. The preceding results imply that  
30 interventions need to particularly target prevention at different profiles: young adult males gambling  
31 online in strategic games, for example, or middle-aged women gambling offline to hazardous games.  
32 Public health messages should be available online and offline which are adapted to these profiles.  
33 Clinical programmes could also be adapted to these specific profiles, for we may suppose that with  
34 respect to the respective cognitive distortions, motivational training would certainly differ between  
35 these profiles.  
36  
37  
38  
39  
40  
41

42 The gambling characteristics identified in this study as significantly different between the three  
43 clusters are easily identified but could also be target of specific intervention to reduce harm in  
44 gambling, especially in at-risk profiles.  
45  
46  
47

48 We demonstrated that a large majority of gamblers in this sample started to **gamble before the legal**  
49 **age of 18 years**. For gambling prevention policy, it is worth noting that despite the ban on gambling  
50 under 18 years of age, minors can gamble very early. We stress the need to develop early  
51 interventions to provide information and prevent gambling, especially among adolescents.  
52 Prevention programmes could include targeted interventions for youth to explain gambling risks and  
53 how to avoid them. One explanation for the framing of risky gambling behaviour of youth may be  
54 gambling advertising and availability. Gambling marketing is present in many media (advertising  
55 posters, the Internet, magazines, television, etc.) that are accessible to adolescents, and its content is  
56  
57  
58  
59  
60

1  
2  
3 very attractive. A recent study showed that marketing significantly influences attitudes towards  
4 gambling, gambling behaviours, and intention to participate [68].  
5  
6

7 We also should pay attention to the **type of gambling and the medium used for gambling**. In our  
8 study, strategic games and Internet gambling seemed to be associated with more serious gambling  
9 profiles and short courses of gambling development in younger men. Targeted prevention on the  
10 Internet, especially regarding strategic games, could be developed to reduce harm from gambling.  
11 Contrariwise, a large majority of the LOSC cluster preferred to gamble in pure chance games offline.  
12 Unlike casino or Internet games, pure chance offline games (especially scratch games) in France do  
13 not include any self-exclusion programmes, and identity controls are not systematic when a ban is in  
14 place. Consequently, French gamblers with gambling problems participating in pure chance games  
15 offline are less able to put in place safeguards that may help them to quit or reduce gambling. This  
16 point is a public health concern, particularly when we consider, as in our study, that gambling  
17 problems occur in vulnerable persons. These results raise questions about the need for governments  
18 to develop policies and regulations to reduce young people's exposure to gambling products and  
19 marketing and to protect vulnerable persons from harm caused by gambling.  
20  
21  
22  
23  
24  
25  
26  
27  
28  
29  
30  
31  
32

33 Caption : figure 1 . clustering : 3 clusters and significant variables and covariables  
34  
35  
36  
37  
38  
39  
40  
41  
42  
43  
44  
45  
46  
47  
48  
49  
50  
51  
52  
53  
54  
55  
56  
57  
58  
59  
60

## REFERENCES

1. Calado, F. and M.D. Griffiths, *Problem gambling worldwide: An update and systematic review of empirical research (2000-2015)*. J Behav Addict, 2016. **5**(4): p. 592-613.
2. Costes, J.-M., et al., *Gambling Patterns and Problems of Gamblers on Licensed and Unlicensed Sites in France*. Journal of Gambling Studies / Co-Sponsored by the National Council on Problem Gambling and Institute for the Study of Gambling and Commercial Gaming, 2015.
3. Shaffer, H.J. and D.A. Korn, *Gambling and related mental disorders: a public health analysis*. Annu Rev Public Health, 2002. **23**: p. 171-212.
4. Williams, R.J., R.A. Volberg, and R.M.G. Stevens. *The population prevalence of problem gambling : methodological influences, standardized rates, jurisdictional differences, and*

- 1  
2  
3 worldwide trends. Report prepared for the Ontario Problem Gambling Research Centre and  
4 the Ontario Ministry of Health and Long term Care 2012.
5. The, L., *Problem gambling is a public health concern*. *Lancet*, 2017. **390**(10098): p. 913.
6. Hing, N., et al., *Maintaining and losing control during internet gambling : a qualitative study*  
7 *of gamblers' experience* *New media Soc.* , 2014. **17**: p. 1075-1095.
- 8  
9. Hing, N., A.M. Russell, and M. Browne, *Risk Factors for Gambling Problems on Online*  
10 *Electronic Gaming Machines, Race Betting and Sports Betting*. *Front Psychol*, 2017. **8**: p. 779.
- 11  
12. De Luigi, N., et al., *Patterns of Gambling Activities and Gambling Problems Among Italian*  
13 *High School Students: Results from a Latent Class Analysis*. *J Gambl Stud*, 2017.
- 14  
15. American Psychiatric Association, *Diagnostic and statistical manual of mental disorders (5th*  
16 *ed.)*. . 2013, Washington, DC.
- 17  
18. Stucki, S. and M. Rihs-Middel, *Prevalence of adult problem and pathological gambling*  
19 *between 2000 and 2005: an update*. *J Gambl Stud*, 2007. **23**(3): p. 245-57.
- 20  
21. Bruneau, M., et al., *Gambling transitions among adult gamblers: A multi-state model using a*  
22 *Markovian approach applied to the JEU cohort*. *Addict Behav*, 2016. **57**: p. 13-20.
- 23  
24. Wardle, H., et al., *The British Gambling prevalence survey 2010*. 2011: London : The  
25 Stationery Office
- 26  
27. Costes, J.M., et al., *Levels and gambling practices in 2010* *Lettre tendances* 2011. **77**: p. 1-8.
- 28  
29. Abbott, M.W., U. Romild, and R.A. Volberg, *Gambling and problem gambling in Sweden:*  
30 *changes between 1998 and 2009*. *J Gambl Stud*, 2014. **30**(4): p. 985-99.
- 31  
32. Guillou Landreat, M., et al., *[Gambling in elderly patients]*. *Soins Gerontol*, 2017. **22**(123): p.  
33 35-37.
- 34  
35. Caillon, J., et al., *[Pathological gambling in adolescence]*. *Arch Pediatr*, 2012. **19**(2): p. 173-9.
- 36  
37. Blaszczyński, A. and L. Nower, *A pathways model of problem and pathological gambling*.  
38 *Addiction (Abingdon, England)*, 2002. **97**(5): p. 487-499.
- 39  
40. Valleur, M., et al., *Towards a Validation of the Three Pathways Model of Pathological*  
41 *Gambling*. *J Gambl Stud*, 2016. **32**(2): p. 757-71.
- 42  
43. Ledgerwood, D.M. and N.M. Petry, *Subtyping pathological gamblers based on impulsivity,*  
44 *depression, and anxiety*. *Psychol Addict Behav*, 2010. **24**(4): p. 680-8.
- 45  
46. Jimenez-Murcia, S., et al., *Mediational Role of Age of Onset in Gambling Disorder, a Path*  
47 *Modeling Analysis*. *J Gambl Stud*, 2016. **32**(1): p. 327-40.
- 48  
49. Jimenez-Murcia, S., et al., *Age of onset in pathological gambling : clinical, therapeutic and*  
50 *personality correlates* *J Gambl Stud*, 2010. **26**(2): p. 235-48.
- 51  
52. Burge, A.N., et al., *Age of gambling initiation and severity of gambling and health problems*  
53 *among older adult problem gamblers*. *Psychiatr Serv*, 2004. **55**(12): p. 1437-9.
- 54  
55. Burge, A.N., R.H. Pietrzak, and N.M. Petry, *Pre/early adolescent onset of gambling and*  
56 *psychosocial problems in treatment-seeking pathological gamblers*. *J Gambl Stud*, 2006.  
57 **22**(3): p. 263-74.
- 58  
59. Gainsbury, S.M., et al., *The interaction between gambling activities and modes of access: a*  
60 *comparison of Internet-only, land-based only, and mixed-mode gamblers*. *Addict Behav*,  
2015. **41**: p. 34-40.
61. Challet-Bouju, G., et al., *A Gamblers Clustering Based on Their Favorite Gambling Activity*. *J*  
*Gambl Stud*, 2015. **31**(4): p. 1767-88.
62. Dufour, M.C., L. Archer, and E. Gordis, *Alcohol and the elderly*. *Clin Geriatr Med*, 1992. **8**(1):  
p. 127-41.
63. Moon, M., et al., *Subtyping Non-treatment-seeking Problem Gamblers Using the Pathways*  
*Model*. *J Gambl Stud*, 2017. **33**(3): p. 841-853.
64. Nower, L. and A. Blaszczyński, *Development and validation of the Gambling Pathways*  
*Questionnaire (GPQ)*. *Psychol Addict Behav*, 2017. **31**(1): p. 95-109.
65. Suomi, A., N.A. Dowling, and A.C. Jackson, *Problem gambling subtypes based on*  
*psychological distress, alcohol abuse and impulsivity*. *Addict Behav*, 2014. **39**(12): p. 1741-5.

- 1
  - 2
  - 3
  - 4
  - 5
  - 6
  - 7
  - 8
  - 9
  - 10
  - 11
  - 12
  - 13
  - 14
  - 15
  - 16
  - 17
  - 18
  - 19
  - 20
  - 21
  - 22
  - 23
  - 24
  - 25
  - 26
  - 27
  - 28
  - 29
  - 30
  - 31
  - 32
  - 33
  - 34
  - 35
  - 36
  - 37
  - 38
  - 39
  - 40
  - 41
  - 42
  - 43
  - 44
  - 45
  - 46
  - 47
  - 48
  - 49
  - 50
  - 51
  - 52
  - 53
  - 54
  - 55
  - 56
  - 57
  - 58
  - 59
  - 60
30. Nower, L., et al., *Subtypes of disordered gamblers: results from the National Epidemiologic Survey on Alcohol and Related Conditions*. *Addiction*, 2013. **108**(4): p. 789-98.
31. Mallorqui-bagué, N., et al., *Cognitive deficits in executive functions and decision-making impairments cluster gambling disorder sub-types* *J Gambl Stud* 2018. **34**(1): p. 209-223.
32. Challet-Bouju, G., et al., *Study protocol: the JEU cohort study--transversal multiaxial evaluation and 5-year follow-up of a cohort of French gamblers*. *BMC Psychiatry*, 2014. **14**: p. 226.
33. Toce-Gerstein, M., D.R. Gerstein, and R.A. Volberg, *A hierarchy of gambling disorders in the community*. *Addiction*, 2003. **98**(12): p. 1661-1672.
34. Potenza, M.N., *Should addictive disorders include non-substance-related conditions?* *Addiction*, 2006. **101 Suppl 1**: p. 142-51.
35. Toneatto, T. and G. Millar, *Assessing and treating problem gambling: empirical status and promising trends*. *Canadian Journal of Psychiatry. Revue Canadienne De Psychiatrie*, 2004. **49**(8): p. 517-525.
36. Boutin, C., " *Le jeu: chance ou stratégie. Choisir librement la place du jeu dans votre vie*" , ed. L.É.d. l'homme. 2010, Quebec
37. Lecrubier, Y., et al., *The Mini International Neuropsychiatric Interview (MINI). A short diagnostic structured interview: reliability and validity according to the CIDI*. *European Psychiatry*, 1997. **12**(5): p. 224-231.
38. Ward, M.F., P.H. Wender, and F.W. Reimherr, *The Wender Utah Rating Scale: an aid in the retrospective diagnosis of childhood attention deficit hyperactivity disorder*. *The American Journal of Psychiatry*, 1993. **150**(6): p. 885-890.
39. Caci, H.M., J. Bouchez, and F.J. Baylé, *An aid for diagnosing attention-deficit/hyperactivity disorder at adulthood: psychometric properties of the French versions of two Wender Utah Rating Scales (WURS-25 and WURS-K)*. *Comprehensive Psychiatry*, 2010. **51**(3): p. 325-331.
40. De Fruyt, F., L. Van De Wiele, and C. Van Heeringen, *Cloninger's Psychobiological Model of Temperament and Character and the Five-Factor Model of Personality*. *Personality and Individual Differences*, 2000. **29**(3): p. 441-452.
41. Cloninger, C., D.M. Svrakic, and T.R. Przybeck, *A psychobiological model of temperament and character*. *Archives of General Psychiatry*, 1993. **50**(12): p. 975-990.
42. N Chakroun-Vinciguerra, M.F., *French validation of a short version of the Temperament and Character Inventory (TCI-125)*. *Journal de Thérapie Comportementale et Cognitive*, 2005. **15**(1): p. 27-33.
43. Vermunt, J.K. and J. Magidson, *Latent class cluster analysis in Applied Latent Class Analysis* C.U. Press, Editor. 2002, Hagenaaars, J.A. McCutcheon, A.L.: Cambridge p. 89-106.
44. Vermunt, J.K. and J. Magidson, *Upgrade Manual for Latent GOLD 5.1 Belmont Massachusetts: Statistical Innovations Inc., in Statistical Innovations* 2016.
45. Magidson, J. and J.K. Vermunt, *Latent class models for clustering: a comparison with K-means*. *Canadian Journal of Marketing Research*, 2002. **20**: p. 36-43.
46. Vermunt, J.K., *Latent Class Modeling with Covariates: Two Improved Three-Step Approaches*. *Political Analysis*, 2010. **18**: p. 450-469.
47. Lynch, W.J., P.K. Maciejewski, and M.N. Potenza, *Psychiatric correlates of gambling in adolescents and young adults grouped by age at gambling onset*. *Arch Gen Psychiatry*, 2004. **61**(11): p. 1116-22.
48. Kessler, R.C., et al., *DSM-IV pathological gambling in the National Comorbidity Survey Replication*. *Psychol Med*, 2008. **38**(9): p. 1351-60.
49. Slutske, W.S., et al., *Test of a potential causal influence of earlier age of gambling initiation on gambling involvement and disorder: a multilevel discordant twin design*. *Psychol Addict Behav*, 2014. **28**(4): p. 1177-89.
50. Bonnaire, C., *[Internet gambling: what are the risks?]*. *Encephale*, 2012. **38**(1): p. 42-9.

- 1
- 2
- 3
- 4 51. Mouneyrac, A., et al., *Cognitive Characteristics of Strategic and Non-strategic Gamblers*. J Gambl Stud, 2017.
- 5
- 6 52. Milner, L., et al., *An exploratory study of embedded gambling promotion in Australian*
- 7 *football television broadcasts*. Communication, Politics and Culture, 2013. **46**: p. 177-198.
- 8
- 9 53. Blaszczynski A. and H. C., *Online Sports Betting has Created New Generation of Problem*
- 10 *Gamblers*, ed. T.U.o. Sydney. 2011, Sydney NSW.
- 11
- 12 54. Moragas, L., et al., *Comparative analysis of distinct phenotypes in gambling disorder based on*
- 13 *gambling preferences*. BMC Psychiatry, 2015. **15**: p. 86.
- 14
- 15 55. Bonnaire, C., M. Lejoyeux, and R. Dardennes, *Sensation seeking in a French population of*
- 16 *pathological gamblers: comparison with regular and nongamblers*. Psychol Rep, 2004. **94**(3
- 17 Pt 2): p. 1361-71.
- 18
- 19 56. Brandt, L. and G. Fischer, *Adult ADHD Is Associated With Gambling Severity and Psychiatric*
- 20 *Comorbidity Among Treatment-Seeking Problem Gamblers*. J Atten Disord, 2017: p.
- 21 1087054717690232.
- 22
- 23 57. Grall-Bronnec, M., et al., *Attention deficit hyperactivity disorder among pathological and at-*
- 24 *risk gamblers seeking treatment: a hidden disorder*. European Addiction Research, 2011.
- 25 **17**(5): p. 231-240.
- 26
- 27 58. Dowling, N.A., et al., *The impacts of problem gambling on concerned significant others*
- 28 *accessing web-based counselling*. Addict Behav, 2014. **39**(8): p. 1253-7.
- 29
- 30 59. Chan, E.M., et al., *Gambling related family coping and the impact of problem gambling on*
- 31 *families in Hong Kong*. Asian J Gambl Issues Public Health, 2016. **6**(1): p. 1.
- 32
- 33 60. Guillou-Landreat, M., et al., *Factors associated with suicidal risk among a French cohort of*
- 34 *problem gamblers seeking treatment*. Psychiatry Res, 2016. **240**: p. 11-18.
- 35
- 36 61. Bonnaire, C., C. Bungener, and I. Varescon, *Subtypes of French pathological gamblers:*
- 37 *comparison of sensation seeking, alexithymia and depression scores*. J Gambl Stud, 2009.
- 38 **25**(4): p. 455-71.
- 39
- 40 62. Bouju, G., et al., *Jeu pathologique : facteurs impliqués*. 2011.
- 41
- 42 63. Grall-Bronnec, M., et al., *Clinical profiles as a function of level and type of impulsivity in a*
- 43 *sample group of at-risk and pathological gamblers seeking treatment*. Journal of Gambling
- 44 *Studies / Co-Sponsored by the National Council on Problem Gambling and Institute for the*
- 45 *Study of Gambling and Commercial Gaming*, 2012. **28**(2): p. 239-252.
- 46
- 47 64. Zakiniaez, Y., et al., *Does Telescoping Exist in Male and Female Gamblers? Does It Matter?*
- 48 *Front Psychol*, 2017. **8**: p. 1510.
- 49
- 50 65. Grant, J.E., B.L. Odlaug, and M.E. Mooney, *Telescoping phenomenon in pathological*
- 51 *gambling: association with gender and comorbidities*. J Nerv Ment Dis, 2012. **200**(11): p. 996-
- 52 8.
- 53
- 54 66. Potenza, M.N., et al., *Gender-Related Differences in the Characteristics of Problem Gamblers*
- 55 *Using a Gambling Helpline*. American Journal of Psychiatry, 2001. **158**(9): p. 1500-1505.
- 56
- 57 67. Slutske, W.S., et al., *Telescoping and gender differences in the time course of disordered*
- 58 *gambling: evidence from a general population sample*. Addiction, 2015. **110**(1): p. 144-51.
- 59
- 60 68. Pitt, H., et al., *Factors that influence children's gambling attitudes and consumption*
- 61 *intentions: lessons for gambling harm prevention research, policies and advocacy strategies*.
- 62 *Harm Reduct J*, 2017. **14**(1): p. 11.



Figure 1. Clustering : 3 clusters and significant variables and covariables

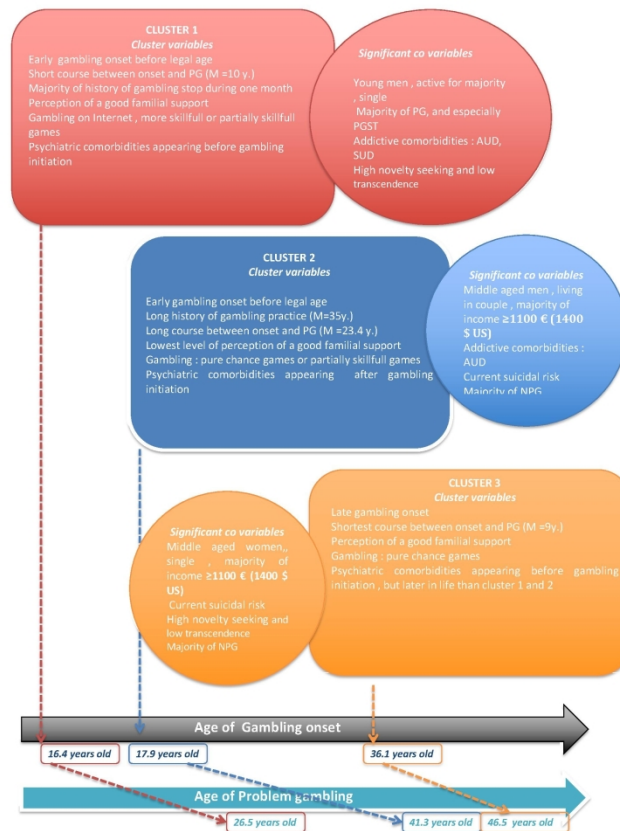

figure 1 . clustering : 3 clusters and significant variables and covariables

209x296mm (300 x 300 DPI)

1  
2  
3  
4  
5  
6  
7  
8  
9  
10  
11  
12  
13  
14  
15  
16  
17  
18  
19  
20  
21  
22  
23  
24  
25  
26  
27  
28  
29  
30  
31  
32  
33  
34  
35  
36  
37  
38  
39  
40  
41  
42  
43  
44  
45  
46  
47  
48  
49  
50  
51  
52  
53  
54  
55  
56  
57  
58  
59  
60

## STROBE Statement—checklist of items that should be included in reports of observational studies

|                              | Item No | Recommendation                                                                                                                                                                             |
|------------------------------|---------|--------------------------------------------------------------------------------------------------------------------------------------------------------------------------------------------|
| <b>Title and abstract</b>    | 1       | (a) Indicate the study's design with a commonly used term in the title or the abstract                                                                                                     |
| <b>p.1</b>                   |         | (b) Provide in the abstract an informative and balanced summary of what was done                                                                                                           |
| <b>P.3</b>                   |         | and what was found                                                                                                                                                                         |
| <b>Introduction</b>          |         |                                                                                                                                                                                            |
| Background/rationale         | 2       | Explain the scientific background and rationale for the investigation being reported                                                                                                       |
| <b>P.5</b>                   |         |                                                                                                                                                                                            |
| Objectives                   | 3       | State specific objectives, including any prespecified hypotheses                                                                                                                           |
| <b>p.6</b>                   |         |                                                                                                                                                                                            |
| <b>Methods</b>               |         |                                                                                                                                                                                            |
| Study design                 | 4       | Present key elements of study design early in the paper                                                                                                                                    |
| <b>p.7</b>                   |         |                                                                                                                                                                                            |
| Setting                      | 5       | Describe the setting, locations, and relevant dates, including periods of recruitment, exposure, follow-up, and data collection                                                            |
| <b>p.7</b>                   |         |                                                                                                                                                                                            |
| Participants                 | 6       | (a) <i>Cohort study</i> —Give the eligibility criteria, and the sources and methods of selection of participants. Describe methods of follow-up                                            |
| <b>p. 7</b>                  |         | <i>Case-control study</i> —Give the eligibility criteria, and the sources and methods of case ascertainment and control selection. Give the rationale for the choice of cases and controls |
|                              |         | <i>Cross-sectional study</i> —Give the eligibility criteria, and the sources and methods of selection of participants                                                                      |
|                              |         | (b) <i>Cohort study</i> —For matched studies, give matching criteria and number of exposed and unexposed                                                                                   |
|                              |         | <i>Case-control study</i> —For matched studies, give matching criteria and the number of controls per case                                                                                 |
| Variables                    | 7       | Clearly define all outcomes, exposures, predictors, potential confounders, and effect modifiers. Give diagnostic criteria, if applicable                                                   |
| <b>p.8</b>                   |         |                                                                                                                                                                                            |
| Data sources/<br>measurement | 8*      | For each variable of interest, give sources of data and details of methods of assessment (measurement). Describe comparability of assessment methods if there is more than one group       |
| <b>p.8</b>                   |         |                                                                                                                                                                                            |
| Bias                         | 9       | Describe any efforts to address potential sources of bias                                                                                                                                  |
| <b>p.21</b>                  |         |                                                                                                                                                                                            |
| Study size                   | 10      | Explain how the study size was arrived at                                                                                                                                                  |
| <b>p.7</b>                   |         |                                                                                                                                                                                            |
| Quantitative variables       | 11      | Explain how quantitative variables were handled in the analyses. If applicable, describe which groupings were chosen and why                                                               |
| <b>p.10</b>                  |         |                                                                                                                                                                                            |
| Statistical methods          | 12      | (a) Describe all statistical methods, including those used to control for confounding                                                                                                      |
| <b>p.10- p.11</b>            |         | (b) Describe any methods used to examine subgroups and interactions                                                                                                                        |
|                              |         | (c) Explain how missing data were addressed                                                                                                                                                |
|                              |         | (d) <i>Cohort study</i> —If applicable, explain how loss to follow-up was addressed                                                                                                        |
|                              |         | <i>Case-control study</i> —If applicable, explain how matching of cases and controls was addressed                                                                                         |
|                              |         | <i>Cross-sectional study</i> —If applicable, describe analytical methods taking account of sampling strategy                                                                               |

1  
2  
3  
4  
5  
6  
7  
8  
9  
10  
11  
12  
13  
14  
15  
16  
17  
18  
19  
20  
21  
22  
23  
24  
25  
26  
27  
28  
29  
30  
31  
32  
33  
34  
35  
36  
37  
38  
39  
40  
41  
42  
43  
44  
45  
46  
47  
48  
49  
50  
51  
52  
53  
54  
55  
56  
57  
58  
59  
60

(e) Describe any sensitivity analyses

Continued on next page

For peer review only

1  
2  
3  
4  
5  
6  
7  
8  
9  
10  
11  
12  
13  
14  
15  
16  
17  
18  
19  
20  
21  
22  
23  
24  
25  
26  
27  
28  
29  
30  
31  
32  
33  
34  
35  
36  
37  
38  
39  
40  
41  
42  
43  
44  
45  
46  
47  
48  
49  
50  
51  
52  
53  
54  
55  
56  
57  
58  
59  
60

| <b>Results</b>                       |     |                                                                                                                                                                                                                                                                                                                                                                                                               |
|--------------------------------------|-----|---------------------------------------------------------------------------------------------------------------------------------------------------------------------------------------------------------------------------------------------------------------------------------------------------------------------------------------------------------------------------------------------------------------|
| Participants<br><b>p.11</b>          | 13* | (a) Report numbers of individuals at each stage of study—eg numbers potentially eligible, examined for eligibility, confirmed eligible, included in the study, completing follow-up, and analysed<br>(b) Give reasons for non-participation at each stage<br>(c) Consider use of a flow diagram                                                                                                               |
| Descriptive data<br><b>p.11-P.12</b> | 14* | (a) Give characteristics of study participants (eg demographic, clinical, social) and information on exposures and potential confounders<br>(b) Indicate number of participants with missing data for each variable of interest<br>(c) <i>Cohort study</i> —Summarise follow-up time (eg, average and total amount)                                                                                           |
| Outcome data<br><b>p.13</b>          | 15* | <i>Cohort study</i> —Report numbers of outcome events or summary measures over time<br><i>Case-control study</i> —Report numbers in each exposure category, or summary measures of exposure<br><i>Cross-sectional study</i> —Report numbers of outcome events or summary measures                                                                                                                             |
| Main results<br><b>p.14-16</b>       | 16  | (a) Give unadjusted estimates and, if applicable, confounder-adjusted estimates and their precision (eg, 95% confidence interval). Make clear which confounders were adjusted for and why they were included<br>(b) Report category boundaries when continuous variables were categorized<br>(c) If relevant, consider translating estimates of relative risk into absolute risk for a meaningful time period |
| Other analyses<br><b>p.16</b>        | 17  | Report other analyses done—eg analyses of subgroups and interactions, and sensitivity analyses                                                                                                                                                                                                                                                                                                                |
| <b>Discussion</b>                    |     |                                                                                                                                                                                                                                                                                                                                                                                                               |
| Key results<br><b>p.18-p.20</b>      | 18  | Summarise key results with reference to study objectives                                                                                                                                                                                                                                                                                                                                                      |
| Limitations<br><b>p.20-p.21</b>      | 19  | Discuss limitations of the study, taking into account sources of potential bias or imprecision. Discuss both direction and magnitude of any potential bias                                                                                                                                                                                                                                                    |
| Interpretation<br><b>p.21-p.22</b>   | 20  | Give a cautious overall interpretation of results considering objectives, limitations, multiplicity of analyses, results from similar studies, and other relevant evidence                                                                                                                                                                                                                                    |
| Generalisability<br><b>p.21-p.22</b> | 21  | Discuss the generalisability (external validity) of the study results                                                                                                                                                                                                                                                                                                                                         |
| <b>Other information</b>             |     |                                                                                                                                                                                                                                                                                                                                                                                                               |
| Funding<br><b>p.2</b>                | 22  | Give the source of funding and the role of the funders for the present study and, if applicable, for the original study on which the present article is based                                                                                                                                                                                                                                                 |

\*Give information separately for cases and controls in case-control studies and, if applicable, for exposed and unexposed groups in cohort and cross-sectional studies.

**Note:** An Explanation and Elaboration article discusses each checklist item and gives methodological background and published examples of transparent reporting. The STROBE checklist is best used in conjunction with this article (freely available on the Web sites of PLoS Medicine at <http://www.plosmedicine.org/>, Annals of Internal Medicine at <http://www.annals.org/>, and Epidemiology at <http://www.epidem.com/>). Information on the STROBE Initiative is available at [www.strobe-statement.org](http://www.strobe-statement.org).
